# Supplementary material for: Facile access to 2-hydroxy-2-substituted indole-3-ones via a copper-catalyzed oxidative cyclization of 2-arylethynylanilines
Source: Royal Society of Chemistry journal article supplement (doi:10.1039/d3cc01390a), 2023-01-01

## Supporting Information for

### **Facile access to 2-hydroxy-3-indolinones via copper-catalyzed oxidative cyclization of 2-arylethynylanilines**

Weiqiang Sun<sup>a</sup>, Xueli Cui<sup>a</sup>, Jing Qu<sup>a</sup>, Xiaojia Cai<sup>a</sup>, Jinhui Hu<sup>a</sup>, Zhuang Xiong<sup>a</sup>, Suqin Guo<sup>a</sup>, Jun Xu<sup>a,b</sup>\*, Wen-Hua Chen<sup>a</sup>\* and Jia-Qiang Wu<sup>a</sup>\*

<sup>a</sup> School of Biotechnology and Health Sciences, Wuyi University, Jiangmen 529020, China

<sup>b</sup> School of Pharmaceutical Sciences, Sun Yat-sen University, Guangzhou 510006, China

Email: wyuchemwjq@wyu.edu.cn; whchen@wyu.edu.cn; xujun9@mail.sysu.edu.cn

### **Table of Contents**

|                                                                                          |    |
|------------------------------------------------------------------------------------------|----|
| <b>1 General information</b> .....                                                       | 1  |
| <b>2. Synthetic Methods for Starting Materials</b> .....                                 | 2  |
| <b>3. Supporting Tables and Schemes</b> .....                                            | 2  |
| <b>4. Experimental procedures and characterization data</b> .....                        | 5  |
| <b>5 Gram-scale experiment and further functionalization of 2a</b> .....                 | 22 |
| <b>6 Mechanistic study</b> .....                                                         | 25 |
| <b>6.1 Radical Quenching Experiment</b> .....                                            | 25 |
| <b>6.2 Reaction commenced under N<sub>2</sub> atmosphere</b> .....                       | 25 |
| <b>6.3 <sup>18</sup>O labeling experiments</b> .....                                     | 26 |
| <b>6.4 Trapping experiment of <sup>1</sup>O<sub>2</sub></b> .....                        | 28 |
| <b>7 X-ray crystallographic data</b> .....                                               | 29 |
| <b>8 NMR Spectra. <sup>1</sup>H NMR, <sup>13</sup>C NMR and <sup>19</sup>F NMR</b> ..... | 32 |

## 1 General information

Unless otherwise noted, commercial reagents were purchased from Adamas, Aladdin, Alfa, Bide, TCI and used without further purification. All reaction were carried out using oven-dried glassware and proceeded without special care. Thin layer chromatography (TLC) was carried out using precoated silica gel plates (0.25 mm, F254) and visualization was accomplished under UV light (254 nm). Column chromatography was performed on 200-300 mesh silica gel.

$^1\text{H}$ ,  $^{19}\text{F}$  and  $^{13}\text{C}$  NMR was recorded on a Bruker AV 500 MHz in solvents as indicated. Chemical shifts ( $\delta$ ) are given in ppm relative to TMS. The residual solvent signals were used as references and the chemical shifts converted to the TMS scale ( $\text{CDCl}_3$ :  $\delta_{\text{H}} = 7.26$  ppm,  $\delta_{\text{C}} = 77.16$  ppm;  $d_6$ -DMSO:  $\delta_{\text{H}} = 2.50$  ppm,  $\delta_{\text{C}} = 39.52$  ppm;  $d_4$ -MeOD:  $\delta_{\text{H}} = 3.31$  ppm,  $\delta_{\text{C}} = 49.00$  ppm). The following abbreviations were used to describe peak splitting patterns when appropriate: s = singlet, d = doublet, t = triplet, q = quartet, m = multiplet, dd = doublet of the doublet. Coupling constants, J, were reported in the hertz unit (Hz). High-resolution mass spectra (HRMS) were recorded on a Thermo Scientific Q Exactive UHMR ((Ultra-High Mass Range) Hybrid QuadrupoleOrbitrap™ mass spectrometer.

No attempts were made to optimize yields for substrate synthesis.

## 2. Synthetic Methods for Starting Materials

### General Procedure for the Synthetic of Substrates [1,2]

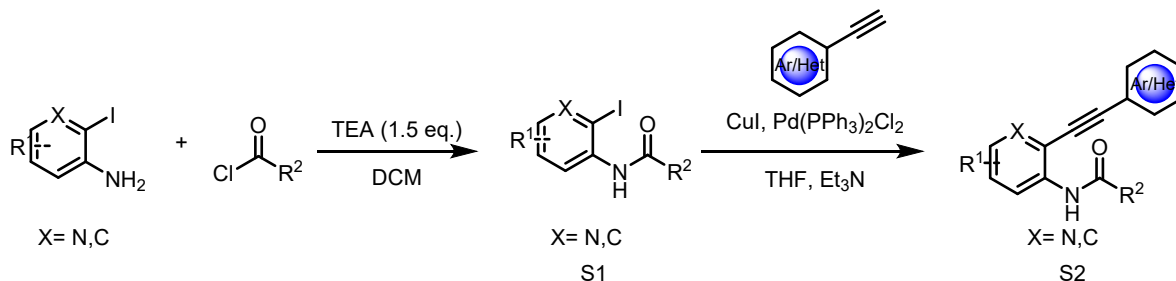

### General procedure for the synthetic of S1:

This step was carried out according to a literature method<sup>[1]</sup> with some modifications. To a solution of corresponding 2-iodoanilines (10.0 mmol) in DCM (25 mL) were added respective acid chlorides (12.0 mmol) followed by NEt<sub>3</sub> (15.0 mmol) at room temperature or 0 °C. After complete addition, the reaction was allowed to stir continuously until all the starting material was consumed completely (monitored by TLC, approx. 0.5–1h). After reaction completion, the mixture was added to brine (15 mL) and extracted with DCM (3×30 mL). The combined organic layer was washed with brine, dried over Na<sub>2</sub>SO<sub>4</sub>, and concentrated in vacuo. The crude product was purified by column chromatography to afford S1.

### General procedure for the synthetic of S2:

To a solution of aryl iodide (10.0 mmol), PdCl<sub>2</sub>(PPh<sub>3</sub>)<sub>2</sub> (0.02 eq.) and CuI (0.04 eq.) in THF (30 mL) at RT under argon. After stirring for 5 minutes, NEt<sub>3</sub> (10.0 mL) was added and ethynylbenzene (1.5 eq.) was added neat and dropwise to the reaction mixture until complete consumption of starting material (monitored by TCL, approx. 4-8h). After completion, the reaction mixture was quenched with water and extracted with ethyl acetate (3 × 20 mL). The organic layer was washed with brine, dried over Na<sub>2</sub>SO<sub>4</sub>, and concentrated in vacuo. The crude product was purified by column chromatography to afford S2.

## 3. Supporting Tables and Schemes

**Table S1.** Screening of the catalyst

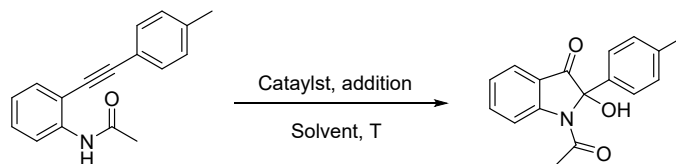

| entry | solvent/1.0 mL | catalyst/30 mol%     | T/°C | time/h | yield/% |
|-------|----------------|----------------------|------|--------|---------|
| 1     | MeCN           | Cu(OTf) <sub>2</sub> | 60   | 5      | 33      |
| 2     | MeCN           | AgOTf                | 60   | 5      | n.r.    |
| 3     | MeCN           | Pd(OAc) <sub>2</sub> | 60   | 5      | trace   |
| 4     | MeCN           | Ni(cod) <sub>2</sub> | 60   | 5      | n.r.    |

**Table S2.** Screening of the ligand

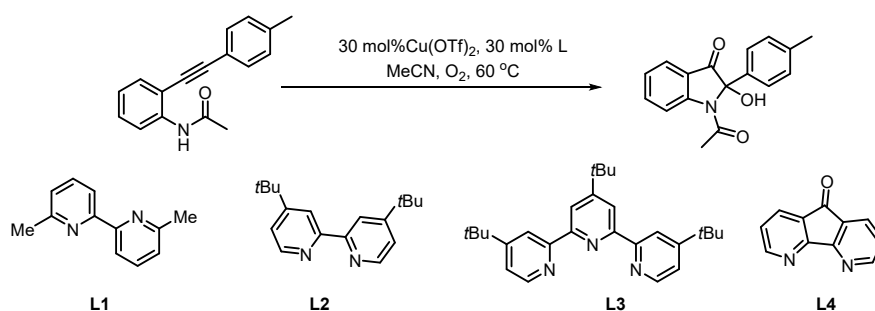

| entry | L/0.3 equiv | T/°C | time/h | yield/% |
|-------|-------------|------|--------|---------|
| 1     | L1          | 60   | 17     | 40      |
| 2     | L2          | 60   | 17     | trace   |
| 3     | L3          | 60   | 17     | n.r.    |
| 4     | L4          | 60   | 17     | n.r.    |

**Table S3.** Screening of the reaction additive

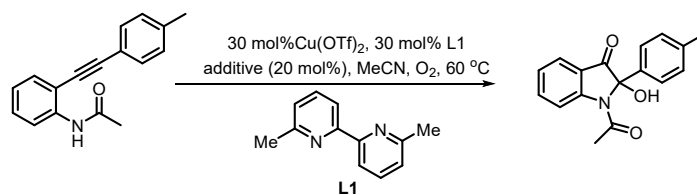

| entry | additive                        | T/°C | time/ h | yield/% |
|-------|---------------------------------|------|---------|---------|
| 1     | K <sub>2</sub> CO <sub>3</sub>  | 60   | 17      | n.r.    |
| 2     | NH <sub>4</sub> Cl              | 60   | 17      | n.r.    |
| 3     | Zn(OTf) <sub>2</sub>            | 60   | 17      | 64      |
| 4     | K <sub>2</sub> HPO <sub>4</sub> | 60   | 17      | trace.  |

**Table S4.** Screening of the reaction solvent

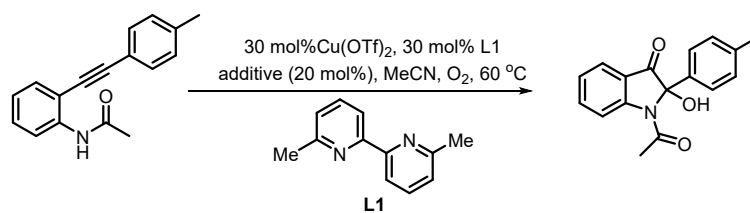

| entry | solvent          | T/°C | time/ h | yield/% |
|-------|------------------|------|---------|---------|
| 1     | HFIP             | 60   | 17      | 54      |
| 2     | THF              | 60   | 17      | trace   |
| 3     | MeCN/HFIP = 10/1 | 60   | 17      | 70      |
| 4     | MeCN/HFIP = 20/1 | 60   | 17      | 57      |
| 5     | MeCN/HFIP = 1/1  | 60   | 17      | 64      |

**Table S5.** Screening of the others reaction conditions

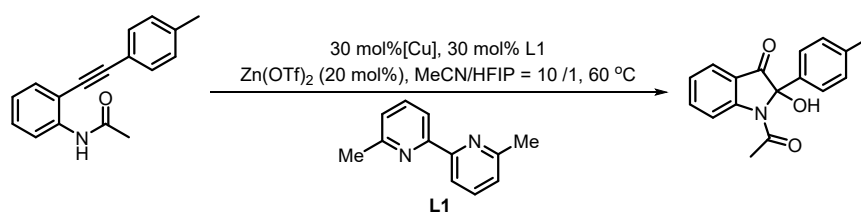

| entry | catalyst/30 mol%     | gaseous atmosphere | T/°C | time/ h | yield/% |
|-------|----------------------|--------------------|------|---------|---------|
| 1     | Cu(OTf) <sub>2</sub> | O <sub>2</sub>     | 60   | 17      | 70      |
| 2     | CuBr                 | O <sub>2</sub>     | 60   | 17      | trace   |
| 3     | CuBr <sub>2</sub>    | O <sub>2</sub>     | 60   | 17      | trace   |
| 4     | Cu(OAc) <sub>2</sub> | O <sub>2</sub>     | 60   | 17      | n.r.    |
| 5     | Cu(OTf) <sub>2</sub> | O <sub>2</sub>     | 80   | 17      | 53%     |
| 6     | Cu(OTf) <sub>2</sub> | O <sub>2</sub>     | 40   | 17      | 46%     |
| 7     | Cu(OTf) <sub>2</sub> | N <sub>2</sub>     | 60   | 17      | n.r.    |

### Scheme S1. Unsuccessful substrates

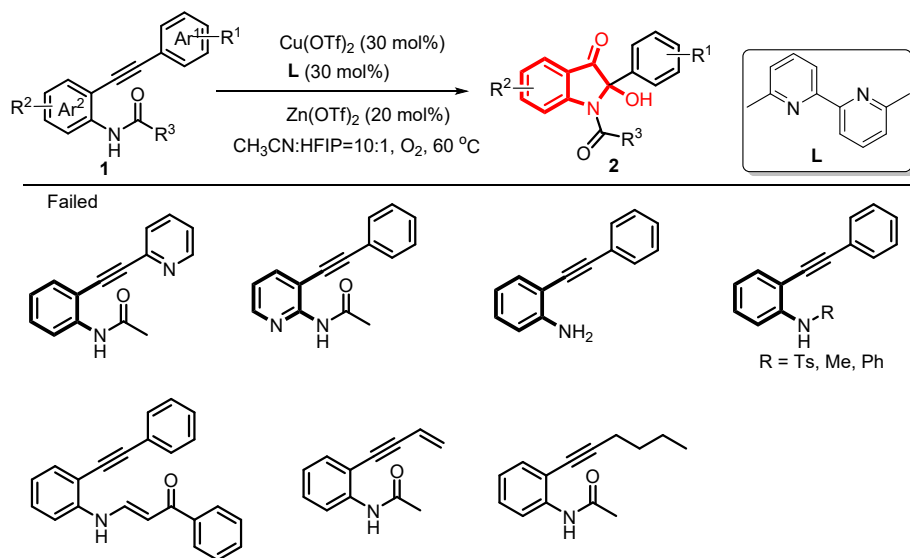

### Scheme S2. Synthesis of diaryl ethylenediones

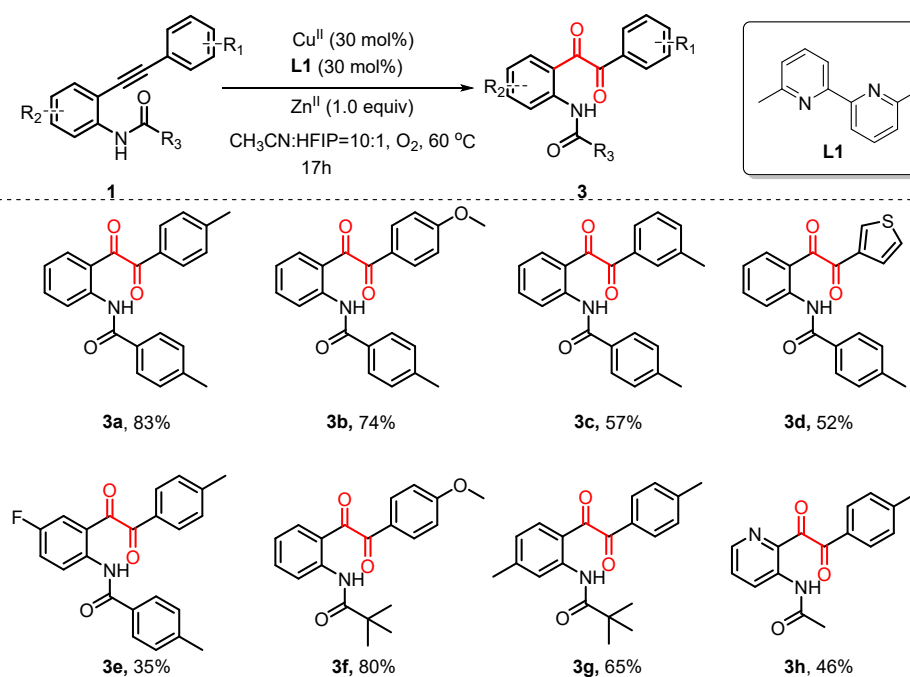

## 4. Experimental procedures and characterization data

### General Procedure A:

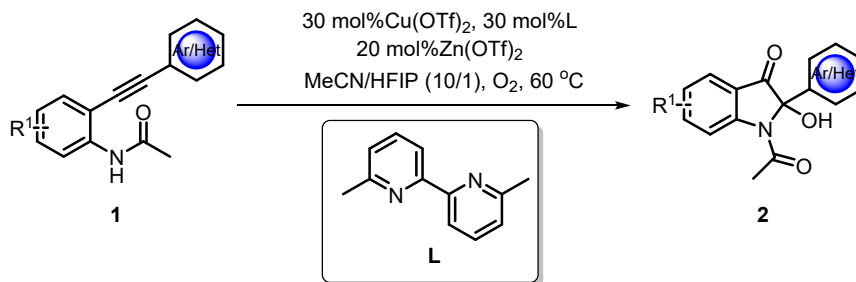

To a 15 mL-schlenk tube charged with a stirring bar was added corresponding 2-arylethynylaniline (0.2 mmol), 20 mol% Zn(OTf)<sub>2</sub>, 30 mol% Cu(OTf)<sub>2</sub>, and 30 mol% 6, 6'-dimethyl-2,2'-bipyridyl and 2.2 mL of MeCN/HFIP (10/1). The schlenk tube was evacuated and refilled with O<sub>2</sub> thrice. The reaction mixture was continuously stirred at 60 °C for 17 hours. After the reaction completed, aq. NH<sub>4</sub>Cl was added to quench the reaction. After extracting with ethyl acetate, washing with saturated sodium chloride, vacuum concentrating, and purification through the column with PE/EA = 4 : 1 to obtain the product.

### General Procedure B:

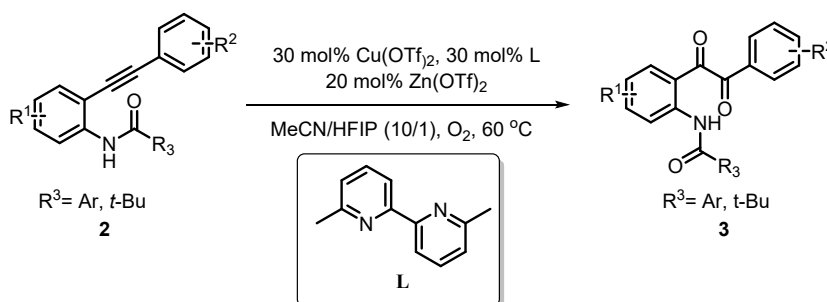

To a 15 mL-schlenk tube charged with a stirring bar was added corresponding 2-arylethynylaniline (0.2 mmol), 20 mol% Zn(OTf)<sub>2</sub>, 30 mol% Cu(OTf)<sub>2</sub>, and 30 mol% 6, 6'-dimethyl-2,2'-bipyridyl and 2.2 mL of MeCN/HFIP (10/1). The schlenk tube was evacuated and refilled with O<sub>2</sub> thrice. The reaction mixture was continuously stirred at 60 °C for 17 hours. After the reaction completed, aq. NH<sub>4</sub>Cl was added to quench the reaction. After extracting with ethyl acetate, washing with saturated sodium chloride, vacuum concentrating, and purification through the column with PE/EA = 4: 1 to obtain the product.

### 1-acetyl-2-hydroxy-2-(p-tolyl)indolin-3-one (2a)

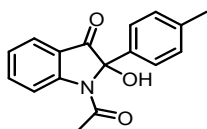

The title compound was prepared via the general procedure **A**, after purification by silica gel column chromatography (PE/EA = 4/1), **2a** was obtained as a white solid (39.5 mg, 0.140 mmol, 70%). Rf = 0.39 (PE/EA = 4/1).

$^1\text{H}$  NMR (500 MHz, DMSO- $d_6$ )  $\delta$  8.59 (d,  $J$  = 8.4 Hz, 1H), 7.97 (s, 1H), 7.83 (t,  $J$  = 7.9 Hz, 1H), 7.70 (d,  $J$  = 7.6 Hz, 1H), 7.31 (t,  $J$  = 7.5 Hz, 1H), 7.24 – 7.19 (m, 4H), 2.28 (s, 3H), 1.91 (s, 3H).  $^{13}\text{C}$  NMR (125 MHz, DMSO- $d_6$ )  $\delta$  196.2, 169.9, 152.5, 138.3, 138.2, 134.2, 129.6, 125.0, 124.7, 124.7, 120.0, 117.4, 90.1, 24.4, 20.7.

ESI-MS: calculated for  $\text{C}_{17}\text{H}_{15}\text{NO}_3$   $[\text{M}+\text{H}]^+$ : 282.1124, found: 282.1120.

### 1-acetyl-2-(4-methoxyphenyl)indolin-3-one (**2b**)

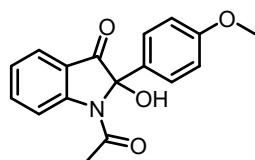

The title compound was prepared via the general procedure **A**, after purification by silica gel column chromatography (PE/EA = 8/1), **2b** was obtained as a white solid (42.2 mg, 0.142 mmol, 71%). Rf = 0.625 (PE/EA = 4/1).

$^1\text{H}$  NMR (500 MHz, DMSO- $d_6$ )  $\delta$  8.58 (d,  $J$  = 8.4 Hz, 1H), 7.95 (s, 1H), 7.84 (td,  $J$  = 8.5, 1.4 Hz, 1H), 7.70 (d,  $J$  = 7.6 Hz, 1H), 7.32 (t,  $J$  = 7.4 Hz, 1H), 7.25 (d,  $J$  = 8.8 Hz, 2H), 6.96 (d,  $J$  = 9.0 Hz, 2H), 3.73 (s, 3H), 1.93 (s, 3H).  $^{13}\text{C}$  NMR (125 MHz, DMSO- $d_6$ )  $\delta$  196.3, 169.9, 159.6, 152.4, 138.2, 128.9, 126.5, 124.8, 124.7, 112.0, 117.4, 114.5, 90.0, 55.2, 24.4.

HRMS (ESI-TOF): calculated for  $\text{C}_{17}\text{H}_{15}\text{NO}_4$   $[\text{M}+\text{Na}]^+$ : 320.0893, found: 320.0890.

### 1-acetyl-2-(4-bromophenyl)-2-hydroxyindolin-3-one (**2c**)

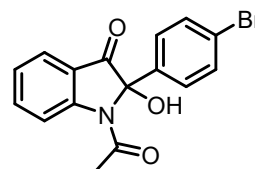

The title compound was prepared via the general procedure **A**, after purification by silica gel column chromatography (PE/EA = 8/1), **2c** was obtained as a white solid (34.6 mg, 0.10 mmol, 50 %). Rf = 0.14 (PE/EA = 4/1).

$^1\text{H}$  NMR (500 MHz, DMSO- $d_6$ )  $\delta$  8.59 (d,  $J$  = 8.4 Hz, 1H), 8.16 (s, 1H), 7.88 – 7.84 (m, 1H), 7.73 (d,  $J$  = 7.4 Hz, 1H), 7.62 (d,  $J$  = 8.6 Hz, 2H), 7.34 (t,  $J$  = 7.4 Hz, 1H), 7.30 (d,  $J$  = 8.4 Hz, 2H), 1.93 (s, 3H).  $^{13}\text{C}$  NMR (125 MHz, DMSO- $d_6$ )  $\delta$  195.7, 169.7, 152.6, 138.4, 136.6, 132.1, 127.4, 124.9, 122.3, 119.7, 117.5, 89.7, 24.4.

ESI-MS: calculated for  $\text{C}_{16}\text{H}_{12}\text{BrNO}_3$   $[\text{M}+\text{H}]^+$ : 346.0073, found: 346.0074.



### 1-acetyl-2-(2-aminophenyl)-2-hydroxyindolin-3-one (2d)

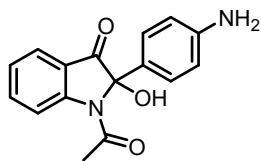

The title compound was prepared via the general procedure **A**, after purification by silica gel column chromatography (PE/EA = 8/1), **2d** was obtained as a white solid (13.1 mg, 0.046 mmol, 23%). Rf = 0.18 (PE/EA = 4/1).

<sup>1</sup>H NMR (500 MHz, Chloroform-*d*) δ 8.36 (d, *J* = 8.4 Hz, 1H), 7.53 (d, *J* = 7.7 Hz, 1H), 7.32 (td, *J* = 7.0, 1.2 Hz, 1H), 7.27 (td, *J* = 7.6, 1.0 Hz, 1H), 7.25 – 7.23 (m, 2H), 6.75 (d, *J* = 8.5 Hz, 2H), 6.54 (s, 1H), 3.89 (s, 2H), 2.11 (s, 3H). <sup>13</sup>C NMR (125 MHz, Chloroform-*d*) δ 171.9, 147.0, 140.2, 137.5, 130.2, 129.2, 124.6, 124.0, 123.6, 123.5, 120.1, 116.0, 115.0, 110.4, 27.9.

HRMS (ESI-TOF): calculated for C<sub>16</sub>H<sub>14</sub>N<sub>2</sub>O<sub>3</sub> [M+Na]<sup>+</sup>: 305.0897, found: 305.0891.

### 4-(1-acetyl-2-hydroxy-3-oxoindolin-2-yl)benzaldehyde (2e)

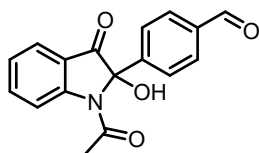

The title compound was prepared via the general procedure **A**, after purification by silica gel column chromatography (PE/EA = 8/1), **2e** was obtained as a white solid (37.8 mg, 0.128 mmol, 64%). Rf = 0.3 (PE/EA = 4/1).

<sup>1</sup>H NMR (500 MHz, DMSO-*d*<sub>6</sub>) δ 10.01 (s, 1H), 8.61 (d, *J* = 8.4 Hz, 1H), 8.29 (s, 1H), 7.96 (d, *J* = 8.5 Hz, 2H), 7.88 (td, *J* = 7.4, 1.4 Hz, 1H), 7.75 (d, *J* = 7.6 Hz, 1H), 7.59 (d, *J* = 8.1 Hz, 2H), 7.35 (t, *J* = 7.9 Hz, 1H), 1.91 (s, 3H). <sup>13</sup>C NMR (125 MHz, DMSO-*d*<sub>6</sub>) δ 195.5, 192.7, 169.6, 152.7, 143.3, 138.6, 136.4, 130.3, 126.0, 124.9, 119.7, 117.6, 89.8, 24.4.

ESI-MS: calculated for C<sub>17</sub>H<sub>13</sub>NO<sub>4</sub> [M+H]<sup>+</sup>: 296.0917, found: 296.0921.

### 1-acetyl-2-hydroxy-2-(*m*-tolyl)indolin-3-one (2f)

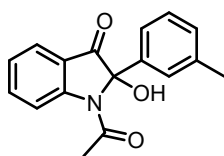

The title compound was prepared via the general procedure **A**, after purification by silica gel column chromatography (PE/EA = 8/1), **2f** was obtained as a white solid (38.1 mg, 0.135 mmol, 67%). Rf = 0.21 (PE/EA = 4/1).

<sup>1</sup>H NMR (500 MHz, DMSO-*d*<sub>6</sub>) δ 8.60 (d, *J* = 8.4 Hz, 1H), 8.01 (s, 1H), 7.85 (t, *J* = 7.5 Hz, 1H), 7.72 (d, 1H), 7.32 (t, *J* = 7.4 Hz, 1H), 7.28 (t, *J* = 7.9 Hz, 1H), 7.19 (s, 1H), 7.19 (d, *J* = 6.7 Hz, 1H), 7.10 (d, *J* = 7.7 Hz, 1H), 2.29 (s, 3H), 1.92 (s, 3H).

$^{13}\text{C}$  NMR (125 MHz,  $\text{DMSO-}d_6$ )  $\delta$  196.1, 169.9, 152.6, 138.4, 138.3, 137.1, 129.5, 129.0, 125.5, 124.8, 124.7, 122.1, 120.0, 117.4, 90.1, 24.4, 21.1.

ESI-MS: calculated for  $\text{C}_{17}\text{H}_{15}\text{NO}_3$   $[\text{M}+\text{H}]^+$ : 282.1124, found: 282.1120.

### 1-acetyl-2-hydroxy-2-(3-methoxyphenyl)indolin-3-one (2g)

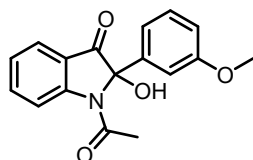

The title compound was prepared via the general procedure **A** with 1.0 equiv.  $\text{Cu}(\text{OTf})_2$ , after purification by silica gel column chromatography (PE/EA = 4/1), **2g** was obtained as a white solid (56%).  $R_f$  = 0.375 (PE/EA = 2/1).

$^1\text{H}$  NMR (500 MHz,  $\text{DMSO-}d_6$ )  $\delta$  8.59 (d,  $J$  = 8.4 Hz, 1H), 8.06 (s, 1H), 7.85 (t,  $J$  = 8.4, 7.4, 1.4 Hz, 1H), 7.73 (d,  $J$  = 7.4 Hz, 1H), 7.35 – 7.29 (m, 2H), 6.98 – 6.95 (m, 2H), 6.78 (d,  $J$  = 7.9 Hz, 1H), 3.75 (s, 3H), 1.94 (s, 3H).  $^{13}\text{C}$  NMR (125 MHz,  $\text{DMSO-}d_6$ )  $\delta$  195.8, 169.9, 159.8, 152.6, 138.8, 138.3, 130.3, 124.8, 124.7, 119.9, 117.4, 116.8, 113.8, 111.4, 89.9, 55.2, 24.4.

ESI-MS: calculated for  $\text{C}_{17}\text{H}_{15}\text{NO}_4$   $[\text{M}+\text{H}]^+$ : 298.1073, found: 298.1070.

### 1-acetyl-2-(3-chlorophenyl)-2-hydroxyindolin-3-one (2h)

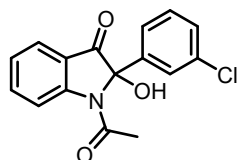

The title compound was prepared via the general procedure **A**, after purification by silica gel column chromatography (PE/EA = 8/1), **2h** was obtained as a white solid (40.0 mg, 0.132 mmol, 66%).  $R_f$  = 0.14 (PE/EA = 4/1).

$^1\text{H}$  NMR (500 MHz,  $\text{DMSO-}d_6$ )  $\delta$  8.59 (d,  $J$  = 8.4 Hz, 1H), 8.25 (s, 1H), 7.87 (td,  $J$  = 8.6, 7.3, 1.5 Hz, 1H), 7.74 (d,  $J$  = 7.6 Hz, 1H), 7.49 – 7.45 (m, 2H), 7.43 (t,  $J$  = 7.9 Hz, 1H), 7.34 (td,  $J$  = 7.5, 0.8 Hz, 1H), 7.20 (d,  $J$  = 7.7 Hz, 1H), 1.94 (s, 3H).  $^{13}\text{C}$  NMR (125 MHz,  $\text{DMSO-}d_6$ )  $\delta$  195.6, 169.6, 152.6, 139.6, 138.5, 133.9, 131.1, 129.0, 125.3, 124.9, 124.9, 123.6, 119.6, 117.5, 89.4, 24.4.

ESI-MS: calculated for  $\text{C}_{16}\text{H}_{12}\text{ClNO}_3$   $[\text{M}+\text{H}]^+$ : 302.0578, found: 302.0573.

### Methyl 3-(1-acetyl-2-hydroxy-3-oxoindolin-2-yl)benzoate(2i)

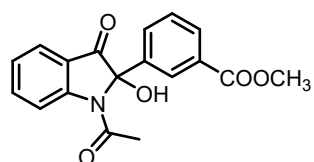

The title compound was prepared via the general procedure **A** with 1.0 equiv.  $\text{Cu}(\text{OTf})_2$ , after purification by silica gel column

chromatography (PE/EA = 8/1), **2i** was obtained as a white solid (48%). Rf = 0.15 (PE/EA = 4/1).

<sup>1</sup>H NMR (500 MHz, DMSO-*d*<sub>6</sub>) δ 8.61 (d, *J* = 8.4 Hz, 1H), 8.28 (s, 1H), 8.01 – 7.97 (m, 2H), 7.88 (td, *J* = 8.6, 1.4 Hz, 1H), 7.74 (dd, *J* = 7.4, 1.1 Hz, 1H), 7.59 – 7.56 (m, 2H), 7.36 (td, *J* = 7.6, 0.8 Hz, 1H), 3.84 (s, 3H), 1.90 (s, 3H). <sup>13</sup>C NMR (125 MHz, DMSO-*d*<sub>6</sub>) δ 195.8, 169.7, 165.8, 152.7, 138.6, 138.0, 130.5, 129.9, 129.8, 129.7, 125.9, 125.0, 119.7, 117.5, 89.6, 52.4, 24.4.

ESI-MS: calculated for C<sub>18</sub>H<sub>15</sub>NO<sub>5</sub> [M+H]<sup>+</sup>: 326.1022, found: 326.1018.

### 1-acetyl-2-hydroxy-6-methyl-2-(*p*-tolyl)indolin-3-one (**2k**)

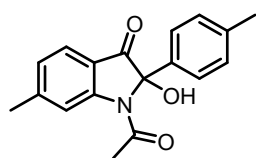

The title compound was prepared via the general procedure **A**, after purification by silica gel column chromatography (PE/EA = 8/1), **2k** was obtained as a white solid (73%). Rf = 0.2 (PE/EA = 4/1).

<sup>1</sup>H NMR (500 MHz, DMSO-*d*<sub>6</sub>) δ 8.44 (s, 1H), 7.95 (s, 1H), 7.59 (d, *J* = 7.8 Hz, 1H), 7.21 (d, *J* = 2.2 Hz, 4H), 7.16 – 7.14 (m, 1H), 2.48 (s, 3H), 2.28 (s, 3H), 1.90 (s, 3H).

<sup>13</sup>C NMR (125 MHz, DMSO-*d*<sub>6</sub>) δ 195.4, 169.9, 152.8, 149.6, 138.2, 134.4, 129.6, 125.8, 125.0, 124.6, 117.8, 117.6, 90.5, 40.0, 24.4, 22.5, 20.7.

ESI-MS: calculated for C<sub>18</sub>H<sub>17</sub>NO<sub>3</sub> [M+H]<sup>+</sup>: 296.1281, found: 296.1275.

### 1-acetyl-6-fluoro-2-hydroxy-2-(*p*-tolyl)indolin-3-one (**2l**)

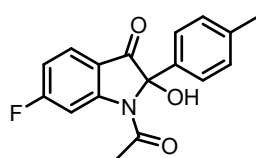

The title compound was prepared via the general procedure **A**, after purification by silica gel column chromatography (PE/EA = 4/1), **2l** was obtained as a white solid (48.4 mg, 0.162 mmol, 81%). Rf = 0.375

(PE/EA = 4/1).

<sup>1</sup>H NMR (500 MHz, DMSO-*d*<sub>6</sub>) δ 8.30 (dd, *J* = 11.1, 2.3 Hz, 1H), 8.09 (s, 1H), 7.81 (dd, *J* = 8.5, 6.0 Hz, 1H), 7.26 – 7.20 (m, 4H), 7.17 (td, *J* = 8.7, 2.3 Hz, 1H), 2.28 (s, 3H), 1.92 (s, 3H).

<sup>13</sup>C NMR (125 MHz, DMSO-*d*<sub>6</sub>) δ 194.5, 170.2, 168.0 (d, *J* = 254.0 Hz), 154.1 (d, *J* = 14.5 Hz), 138.5, 133.9, 129.7, 127.5 (d, *J* = 12.1 Hz), 125.1, 116.8, 112.6 (d, *J* = 24.1 Hz), 104.7 (d, *J* = 29.4 Hz), 90.9, 24.3, 20.7. <sup>19</sup>F NMR (471 MHz, DMSO-*d*<sub>6</sub>) δ -97.08 (dd, *J* = 11.1, 7.2 Hz).

ESI-MS: calculated for C<sub>17</sub>H<sub>14</sub>FNO<sub>3</sub> [M+H]<sup>+</sup>: 300.1030, found: 300.1025.

### 1-acetyl-2-hydroxy-5-methyl-2-(p-tolyl)indolin-3-one (2m)

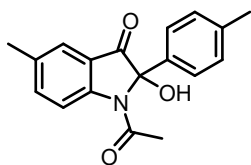

The title compound was prepared via the general procedure **A**, after purification by silica gel column chromatography (PE/EA = 8/1), **2m** was obtained as a white solid (44.3 mg, 0.150 mmol, 75%). R<sub>f</sub> = 0.25 (PE/EA = 4/1).

<sup>1</sup>H NMR (500 MHz, DMSO-*d*<sub>6</sub>) δ 8.48 (d, *J* = 8.5 Hz, 1H), 7.95 (s, 1H), 7.66 (d, *J* = 8.7 Hz, 1H), 7.5 (s, 1H), 7.20 (s, 4H), 2.35 (s, 3H), 2.28 (s, 3H), 1.89 (s, 3H). <sup>13</sup>C NMR (125 MHz, DMSO-*d*<sub>6</sub>) δ 196.2, 169.6, 150.7, 139.0, 138.2, 134.4, 134.2, 129.6, 125.0, 124.2, 120.1, 117.2, 90.3, 24.3, 20.7, 20.2.

HRMS (ESI-TOF): calculated for C<sub>18</sub>H<sub>17</sub>NO<sub>3</sub> [M+Na]<sup>+</sup>: 318.1101, found: 318.1100.

### 1-acetyl-5-bromo-2-hydroxy-2-(p-tolyl)indolin-3-one (2n)

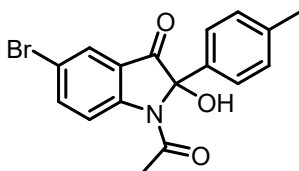

The title compound was prepared via the general procedure **A**, after purification by silica gel column chromatography (PE/EA = 8/1), **2n** was obtained as a white solid (40.3 mg, 0.112 mmol, 56%). R<sub>f</sub> = 0.29 (PE/EA = 4/1).

<sup>1</sup>H NMR (500 MHz, DMSO-*d*<sub>6</sub>) δ 8.54 (d, *J* = 8.9 Hz, 1H), 8.07 (s, 1H), 8.00 (dd, *J* = 8.9, 2.3 Hz, 1H), 7.87 (d, *J* = 2.2 Hz, 1H), 7.24 – 7.20 (m, 4H), 2.28 (s, 3H), 1.91 (s, 3H). <sup>13</sup>C NMR (125 MHz, DMSO-*d*<sub>6</sub>) δ 195.1, 182.8, 169.9, 151.4, 140.4, 138.5, 133.7, 129.7, 126.9, 125.1, 121.9, 119.5, 116.4, 90.4, 24.3, 20.7.

ESI-MS: calculated for C<sub>17</sub>H<sub>14</sub>BrNO<sub>3</sub> [M+H]<sup>+</sup>: 361.0029, found: 361.0022.

### 1-acetyl-5-fluoro-2-hydroxy-2-(p-tolyl)indolin-3-one (2o)

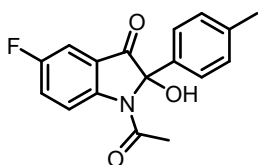

The title compound was prepared via the general procedure **A**, after purification by silica gel column chromatography (PE/EA = 4/1), **2o** was obtained as a white solid (29.7 mg, 0.099 mmol, 50%). R<sub>f</sub> = 0.55 (PE/EA = 2/1).

<sup>1</sup>H NMR (500 MHz, DMSO-*d*<sub>6</sub>) δ 8.62 (dd, *J* = 9.1, 4.3 Hz, 1H), 8.05 (s, 1H), 7.73 (td, *J* = 9.1, 2.9 Hz, 1H), 7.56 (dd, *J* = 7.0, 2.9 Hz, 1H), 7.25 – 7.20 (m, 4H), 2.29 (s, 3H), 1.90 (s, 3H). <sup>13</sup>C NMR (125 MHz, DMSO-*d*<sub>6</sub>) δ 195.7, 169.6, 158.6 (d, *J* = 244.3 Hz), 149.1, 138.5, 133.8, 129.7,

125.2 (d,  $J = 23.9$  Hz), 121.3 (d,  $J = 7.4$  Hz), 119.2 (d,  $J = 7.3$  Hz), 110.3 (d,  $J = 23.2$  Hz), 90.6, 24.2, 20.7.  $^{19}\text{F}$  NMR (471 MHz, DMSO- $d_6$ )  $\delta$  -117.28 (t,  $J = 9.5$  Hz).

ESI-MS: calculated for  $\text{C}_{17}\text{H}_{14}\text{FNO}_3$   $[\text{M}+\text{H}]^+$ : 300.1030, found: 300.1025.

### 1-acetyl-2-hydroxy-2-(p-tolyl)-5-(trifluoromethyl)indolin-3-one (2p)

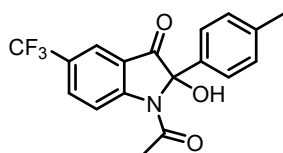

The title compound was prepared via the general procedure **A**, after purification by silica gel column chromatography (PE/EA = 8/1), **2p** was obtained as a white solid (41%).  $R_f = 0.33$  (PE/EA = 4/1).

$^1\text{H}$  NMR (500 MHz, Chloroform- $d$ )  $\delta$  8.57 (d,  $J = 8.3$  Hz, 1H), 8.10 (s, 1H), 7.74 (s, 1H), 7.56 (d,  $J = 8.7$  Hz, 1H), 7.44 (d,  $J = 8.0$  Hz, 2H), 7.22 (d,  $J = 7.8$  Hz, 2H), 2.41 (s, 3H), 2.27 (s, 3H).

$^{13}\text{C}$  NMR (125 MHz, Chloroform- $d$ )  $\delta$  168.4, 141.4, 139.9, 131.5, 129.5, 128.7 (d,  $J = 3.8$  Hz), 126.4 (d,  $J = 3.5$  Hz), 125.4 (d,  $J = 33.5$  Hz), 123.7 (d,  $J = 272.0$  Hz), 119.0, 118.6, 112.3, 98.0, 82.3, 25.1, 21.6.  $^{19}\text{F}$  NMR (471 MHz, Chloroform- $d$ )  $\delta$  -62.34.

HRMS (ESI-TOF): calculated for  $\text{C}_{18}\text{H}_{14}\text{F}_3\text{NO}_3$   $[\text{M}+\text{Na}]^+$ : 372.0818, found: 372.0816.

### 1-acetyl-2-hydroxy-4-methyl-2-(p-tolyl)indolin-3-one (2q)

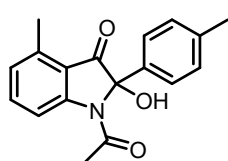

The title compound was prepared via the general procedure **A**, after purification by silica gel column chromatography (PE/EA = 8/1), **2q** was obtained as a white solid (51%).  $R_f = 0.18$  (PE/EA = 4/1).

$^1\text{H}$  NMR (500 MHz, DMSO- $d_6$ )  $\delta$  8.45 (d,  $J = 8.4$  Hz, 1H), 7.90 (s, 1H), 7.67 (t,  $J = 7.8$  Hz, 1H), 7.23 – 7.19 (m, 4H), 7.10 (d,  $J = 7.5$  Hz, 1H), 2.48 (s, 3H), 2.28 (s, 3H), 1.90 (s, 3H).  $^{13}\text{C}$  NMR (125 MHz, DMSO- $d_6$ )  $\delta$  196.8, 169.8, 153.0, 139.6, 138.2, 137.3, 134.6, 129.6, 126.1, 125.0, 117.6, 114.7, 89.7, 24.5, 20.7, 18.0.

ESI-MS: calculated for  $\text{C}_{18}\text{H}_{17}\text{NO}_3$   $[\text{M}+\text{H}]^+$ : 296.1281, found: 296.1282.

### 1-acetyl-2-hydroxy-2-(1H-indol-5-yl)indolin-3-one (2r)

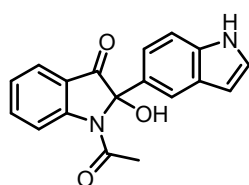

The title compound was prepared via the general procedure **A**, after purification by silica gel column chromatography (PE/EA = 8/1), **2r** was obtained as a white solid (52%).  $R_f = 0.2$  (PE/EA = 4/1).

$^1\text{H}$  NMR (500 MHz, DMSO- $d_6$ )  $\delta$  11.34 (s, 1H), 8.24 (d,  $J = 8.2$  Hz, 1H), 7.72 (s, 1H), 7.59 (d,  $J = 6.9$  Hz, 1H), 7.52 (d,  $J = 8.3$  Hz, 1H), 7.45 (t,  $J = 2.7$  Hz, 1H), 7.31 (td,  $J = 8.3, 7.8, 1.5$  Hz, 1H), 7.26 (td,  $J = 7.4, 1.2$  Hz, 1H), 7.21 (dd,  $J = 8.3, 1.6$  Hz, 1H), 6.69 (s, 1H), 6.53 (s, 1H), 1.98 (s, 3H).

$^{13}\text{C}$  NMR (125 MHz,  $\text{DMSO-}d_6$ )  $\delta$  171.6, 141.6, 136.9, 135.8, 129.0, 127.7, 126.6, 124.2, 124.2, 123.4, 122.3, 120.6, 120.2, 115.4, 111.7, 109.9, 101.6, 27.4.

HRMS (ESI-TOF): calculated for  $\text{C}_{18}\text{H}_{14}\text{N}_2\text{O}_3$   $[\text{M}+\text{Na}]^+$ : 329.0896, found: 329.0898.

### 1-acetyl-2-hydroxy-2-(thiophen-3-yl)indolin-3-one(2s)

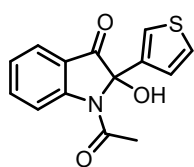

The title compound was prepared via the general procedure **A**, after purification by silica gel column chromatography (PE/EA = 4/1), **2s** was obtained as a white solid (27.2 mg, 0.100 mmol, 50%).  $R_f$  = 0.34 (PE/EA = 2/1).

$^1\text{H}$  NMR (500 MHz,  $\text{DMSO-}d_6$ )  $\delta$  8.56 (d,  $J$  = 8.4 Hz, 1H), 7.95 (s, 1H), 7.83 (t,  $J$  = 7.8 Hz, 1H), 7.72 (d,  $J$  = 7.5 Hz, 1H), 7.56 (dt,  $J$  = 8.0, 2.1 Hz, 2H), 7.32 (t,  $J$  = 7.4 Hz, 1H), 6.86 (d,  $J$  = 4.9 Hz, 1H), 2.00 (s, 3H).  $^{13}\text{C}$  NMR (125 MHz,  $\text{DMSO-}d_6$ )  $\delta$  195.5, 169.8, 152.0, 138.7, 138.2, 128.1, 124.7, 124.6, 123.8, 119.8, 117.6, 89.0, 24.2.

HRMS (ESI-TOF): calculated for  $\text{C}_{14}\text{H}_{11}\text{NO}_3\text{S}$   $[\text{M}+\text{Na}]^+$ : 296.0352, found: 296.0352.

### 1-acetyl-2-(furan-2-yl)-2-hydroxyindolin-3-one (2t)

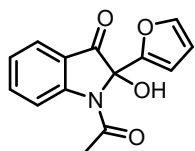

The title compound was prepared via the general procedure **A**, after purification by silica gel column chromatography (PE/EA = 4/1), **2t** was obtained as a white solid (26.2 mg, 0.102 mmol, 51%).  $R_f$  = 0.14 (PE/EA = 4/1).

$^1\text{H}$  NMR (500 MHz,  $\text{DMSO-}d_6$ )  $\delta$  8.52 (d,  $J$  = 8.4 Hz, 1H), 8.20 (s, 1H), 7.82 (ddd,  $J$  = 8.6, 7.4, 1.5 Hz, 1H), 7.74 (d,  $J$  = 7.4 Hz, 1H), 7.62 (dd,  $J$  = 1.7, 0.8 Hz, 1H), 7.31 (td,  $J$  = 7.5, 0.7 Hz, 1H), 6.69 (dd,  $J$  = 3.3, 0.8 Hz, 1H), 6.52 (dd,  $J$  = 3.3, 1.8 Hz, 1H), 2.04 (s, 3H).  $^{13}\text{C}$  NMR (125 MHz,  $\text{DMSO-}d_6$ )  $\delta$  194.7, 169.8, 152.3, 149.6, 143.9, 138.5, 124.6, 119.8, 117.6, 111.3, 109.8, 86.8, 23.4.

ESI-MS: calculated for  $\text{C}_{14}\text{H}_{11}\text{NO}_4$   $[\text{M}+\text{Na}]^+$ : 280.0580, found: 280.0581.

### 2-hydroxy-2-(4-methoxyphenyl)-3-oxoindoline-1-carbaldehyde (2u)

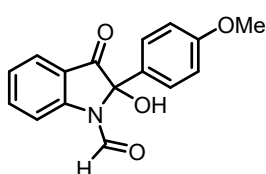

The title compound was prepared via the general procedure **A**, after purification by silica gel column chromatography (PE/EA = 4/1), **2u** was obtained as a white solid (53%).  $R_f$  = 0.37 (PE/EA = 2/1).

$^1\text{H}$  NMR (500 MHz,  $\text{DMSO-}d_6$ )  $\delta$  8.48 (s, 1H), 8.37 (d,  $J = 8.2$  Hz, 1H), 8.07 (s, 1H), 7.89 (td,  $J = 1.2, 8.4$  Hz, 1H), 7.76 (d,  $J = 7.5$  Hz, 1H), 7.37 (t,  $J = 7.4$  Hz, 1H), 7.31 (d,  $J = 8.9$  Hz, 2H), 6.96 (d,  $J = 8.9$  Hz, 2H), 3.74 (s, 3H).  $^{13}\text{C}$  NMR (125 MHz,  $\text{DMSO-}d_6$ )  $\delta$  196.1, 160.7, 159.9, 150.1, 138.5, 128.8, 127.1, 125.4, 125.1, 120.3, 116.4, 114.4, 89.3, 55.3.

HRMS (ESI-TOF): calculated for  $\text{C}_{16}\text{H}_{13}\text{NO}_4$   $[\text{M}+\text{Na}]^+$ : 306.0737, found: 306.0736.

## 2-(4-bromophenyl)-2-hydroxy-3-oxoindoline-1-carbaldehyde (2v)

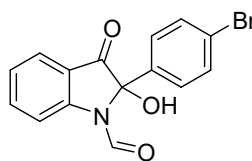

The title compound was prepared via the general procedure A with 1.0 equiv.  $\text{Cu}(\text{OTf})_2$ , after purification by silica gel column chromatography (PE/EA = 4/1), **2v** was obtained as a white solid (29.2 mg, 0.088 mmol, 44%).  $R_f = 0.33$  (PE/EA = 4/1).

$^1\text{H}$  NMR (500 MHz,  $\text{DMSO-}d_6$ )  $\delta$  8.50 (s, 1H), 8.39 (d,  $J = 8.2$  Hz, 1H), 8.28 (s, 1H), 7.93 – 7.89 (m, 1H), 7.79 (d,  $J = 7.9$  Hz, 1H), 7.63 (d,  $J = 8.6$  Hz, 2H), 7.40 (t,  $J = 7.5$  Hz, 1H), 7.36 (d,  $J = 8.6$  Hz, 2H).  $^{13}\text{C}$  NMR (125 MHz,  $\text{DMSO-}d_6$ )  $\delta$  195.5, 160.6, 150.3, 138.7, 132.0, 128.0, 125.5, 125.2, 122.7, 116.6, 89.0.

ESI-MS: calculated for  $\text{C}_{15}\text{H}_{10}\text{BrNO}_3$   $[\text{M}+\text{Na}]^+$ : 353.9736, found: 353.9735.

## 1-heptanoyl-2-hydroxy-2-phenylindolin-3-one (2w)

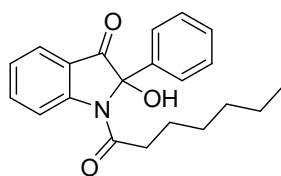

The title compound was prepared via the general procedure A, after purification by silica gel column chromatography (PE/EA = 16/1), **2w** was obtained as a white solid (30.1 mg, 0.088 mmol, 44%).  $R_f = 0.47$  (PE/EA = 8/1).

$^1\text{H}$  NMR (500 MHz,  $\text{DMSO-}d_6$ )  $\delta$  8.64 (d,  $J = 8.4$  Hz, 1H), 8.05 (s, 1H), 7.85 (ddd,  $J = 8.6, 7.5, 1.4$  Hz, 1H), 7.73 – 7.70 (m, 1H), 7.42 – 7.31 (m, 6H), 2.49 – 2.43 (m, 1H), 1.98 (ddd,  $J = 15.7, 8.4, 6.5$  Hz, 1H), 1.28 – 1.22 (m, 2H), 1.15 – 1.08 (m, 2H), 1.03 – 0.93 (m, 4H), 0.77 (t,  $J = 7.3$  Hz, 3H).

$^{13}\text{C}$  NMR (125 MHz,  $\text{DMSO-}d_6$ )  $\delta$  196.6, 173.4, 153.2, 138.7, 137.8, 129.4, 129.2, 125.5, 125.2, 125.1, 120.4, 118.0, 90.5, 35.9, 31.2, 28.5, 24.6, 22.3, 14.3.

ESI-MS: calculated for  $\text{C}_{21}\text{H}_{23}\text{NO}_3$   $[\text{M}+\text{Na}]^+$ : 360.1570, found: 360.1562.

## 2-hydroxy-2-phenyl-1-(2-phenylacetyl)indolin-3-one (2x)

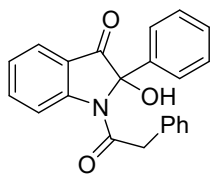

The title compound was prepared via the general procedure **A**, after purification by silica gel column chromatography (PE/EA = 4/1), **2v** was obtained as a white solid (16.5 mg, 0.048 mmol, 24%). Rf = 0.17 (PE/EA = 8/1).

$^1\text{H}$  NMR (500 MHz, DMSO- $d_6$ )  $\delta$  8.59 (d,  $J$  = 8.4 Hz, 1H), 8.29 (s, 1H), 7.85 (ddd,  $J$  = 8.6, 7.4, 1.4 Hz, 1H), 7.77 – 7.72 (m, 1H), 7.43 (p,  $J$  = 3.5, 2.8 Hz, 5H), 7.37 – 7.32 (m, 1H), 7.21 – 7.13 (m, 3H), 6.89 (dd,  $J$  = 7.7, 1.5 Hz, 2H), 3.83 (d,  $J$  = 15.7 Hz, 1H), 3.34 (s, 1H).

$^{13}\text{C}$  NMR (125 MHz, DMSO- $d_6$ )  $\delta$  196.3, 171.4, 153.0, 138.8, 137.8, 135.4, 130.0, 129.7, 129.5, 128.5, 126.9, 125.6, 125.4, 125.3, 120.6, 118.0, 90.7, 42.4.

ESI-MS: calculated for  $\text{C}_{22}\text{H}_{17}\text{NO}_3$   $[\text{M}+\text{Na}]^+$ : 366.1100, found: 366.1095.

#### 4-methyl-N-(2-(2-oxo-2-(p-tolyl)acetyl)phenyl)benzamid (3a)

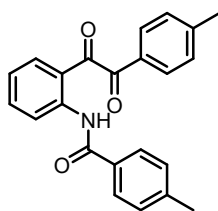

The title compound was prepared via the general procedure **B**, after purification by silica gel column chromatography (PE/EA = 8/1), **3a** was obtained as a white solid (59.1 mg, 0.165 mmol, 83%). Rf = 0.475 (PE/EA = 4/1).

$^1\text{H}$  NMR (500 MHz, Chloroform- $d$ )  $\delta$  12.32 (s, 1H), 9.08 (d,  $J$  = 8.5 Hz, 1H), 8.01 (d,  $J$  = 8.2 Hz, 2H), 7.86 (d,  $J$  = 8.1 Hz, 2H), 7.69 (t,  $J$  = 7.9 Hz, 1H), 7.65 – 7.59 (m, 1H), 7.33 (d,  $J$  = 8.1 Hz, 4H), 7.09 (t,  $J$  = 7.6 Hz, 1H), 2.43 (d,  $J$  = 5.9 Hz, 6H).  $^{13}\text{C}$  NMR (125 MHz, Chloroform- $d$ )  $\delta$  199.6, 192.9, 166.2, 146.6, 143.0, 143.0, 137.2, 134.3, 131.5, 130.4, 130.1, 129.9, 129.6, 127.6, 122.6, 120.8, 118.3, 22.0, 21.6.

ESI-MS: calculated for  $\text{C}_{23}\text{H}_{19}\text{NO}_3$   $[\text{M}+\text{H}]^+$ : 358.1437, found: 358.1437.

#### N-(2-(2-(4-methoxyphenyl)-2-oxoacetyl)phenyl)-4-methylbenzamide (3b)

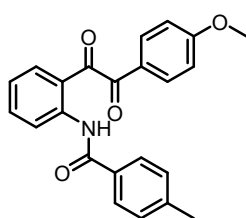

The title compound was prepared via the general procedure **B**, after purification by silica gel column chromatography (PE/EA = 8/1), **3b** was obtained as a white solid (55.5 mg, 0.149 mmol, 74%). Rf = 0.29 (PE/EA = 4/1).

$^1\text{H}$  NMR (500 MHz, Chloroform- $d$ )  $\delta$  12.33 (s, 1H), 9.06 (d,  $J$  = 8.5 Hz, 1H), 8.01 (d,  $J$  = 8.2 Hz, 2H), 7.93 (d,  $J$  = 8.8 Hz, 2H), 7.68 (t,  $J$  = 7.9 Hz, 1H), 7.64 (d,  $J$  = 6.9 Hz, 1H), 7.32 (d,  $J$  = 8.0 Hz, 2H), 7.09 (t,  $J$  = 7.6 Hz, 1H), 6.98 (d,  $J$  = 8.9 Hz, 2H), 3.88 (s, 3H), 2.42 (s, 3H).  $^{13}\text{C}$



NMR (125 MHz, Chloroform-*d*)  $\delta$  199.7, 191.8, 166.2, 165.2, 143.0, 142.9, 137.1, 134.3, 132.5, 131.6, 129.6, 127.6, 125.8, 122.6, 120.8, 118.4, 114.6, 55.7, 21.6.

HRMS (ESI-TOF): calculated for C<sub>23</sub>H<sub>19</sub>NO<sub>4</sub> [M+Na]<sup>+</sup>: 396.1206, found: 396.1206.

#### 4-methyl-N-(2-(2-oxo-2-(*m*-tolyl)acetyl)phenyl)benzamide (3c)

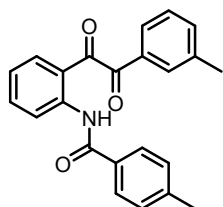

The title compound was prepared via the general procedure **B**, after purification by silica gel column chromatography (PE/EA = 16/1), **3c** was obtained as a white solid (40.8 mg, 0.114 mmol, 57 %). R<sub>f</sub> = 0.25 (PE/EA = 16/1).

<sup>1</sup>H NMR (500 MHz, Chloroform-*d*)  $\delta$  12.31 (s, 1H), 9.08 (d, *J* = 8.5 Hz, 1H), 8.02 (d, *J* = 8.2 Hz, 2H), 7.77 (d, *J* = 8.3 Hz, 2H), 7.72 – 7.67 (m, 1H), 7.62 (dd, *J* = 8.0, 1.4 Hz, 1H), 7.49 (d, *J* = 7.5 Hz, 1H), 7.42 (t, *J* = 7.6 Hz, 1H), 7.33 (d, *J* = 8.1 Hz, 2H), 7.12 – 7.08 (m, 1H), 2.43 (s, 3H), 2.42 (s, 3H). <sup>13</sup>C NMR (125 MHz, Chloroform-*d*)  $\delta$  199.5, 193.4, 166.2, 143.0, 143.0, 139.3, 137.3, 136.1, 134.3, 132.8, 131.5, 130.3, 129.6, 129.1, 127.6, 127.4, 122.7, 120.9, 118.3, 21.6, 21.3.

HRMS (ESI-TOF): calculated for C<sub>23</sub>H<sub>19</sub>NO<sub>3</sub> [M+Na]<sup>+</sup>: 380.1257, found: 380.1258.

#### 4-methyl-N-(2-(2-oxo-2-(thiophen-3-yl)acetyl)phenyl)benzamide (3d)

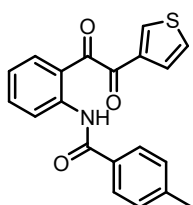

The title compound was prepared via the general procedure **B**, after purification by silica gel column chromatography (PE/EA = 8/1), **3d** was obtained as a white solid (36.6 mg, 0.105 mmol, 52%). R<sub>f</sub> = 0.42 (PE/EA = 4/1).

<sup>1</sup>H NMR (500 MHz, Chloroform-*d*)  $\delta$  12.24 (s, 1H), 9.06 (d, *J* = 8.2 Hz, 1H), 8.19 (dd, *J* = 2.8, 1.2 Hz, 1H), 8.00 (d, *J* = 8.2 Hz, 2H), 7.71 – 7.68 (m, 2H), 7.66 (dd, *J* = 5.2, 1.2 Hz, 1H), 7.43 (dd, *J* = 5.1, 2.9 Hz, 1H), 7.33 (d, *J* = 8.0 Hz, 2H), 7.14 – 7.09 (m, 1H), 2.43 (s, 3H). <sup>13</sup>C NMR (125 MHz, Chloroform-*d*)  $\delta$  198.1, 186.4, 166.2, 143.2, 143.0, 137.9, 137.3, 137.1, 134.3, 131.5, 129.6, 127.6, 127.6, 127.1, 122.6, 120.9, 117.8, 21.6.

HRMS (ESI-TOF): calculated for C<sub>20</sub>H<sub>15</sub>NO<sub>3</sub>S [M+Na]<sup>+</sup>: 372.0665, found: 372.0663.

### N-(4-fluoro-2-(2-oxo-2-(p-tolyl)acetyl)phenyl)-4-methylbenzamide (3e)

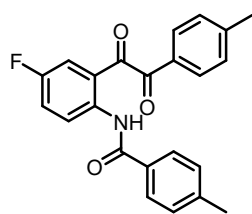

The title compound was prepared via the general procedure **B**, after purification by silica gel column chromatography (PE/EA = 32/1), **3e** was obtained as a white solid (26.0 mg, 0.069 mmol, 35%).  $R_f = 0.2$  (PE/EA = 16/1).

$^1\text{H}$  NMR (500 MHz, Chloroform-*d*)  $\delta$  12.15 (s, 1H), 9.10 (dd,  $J = 9.4, 4.9$  Hz, 1H), 7.99 (d,  $J = 8.2$  Hz, 2H), 7.86 (d,  $J = 8.2$  Hz, 2H), 7.42 (ddd,  $J = 9.6, 7.5, 3.0$  Hz, 1H), 7.36 – 7.30 (m, 5H), 2.46 (s, 3H), 2.44 (s, 3H).  $^{13}\text{C}$  NMR (125 MHz, Chloroform-*d*)  $\delta$  198.4, 192.1, 166.1, 158.0, 156.0, 147.0, 143.1, 139.4, 131.3, 130.2, 130.0, 129.7, 127.6, 124.5 (d,  $J = 21.9$  Hz), 122.9 (d,  $J = 6.7$  Hz), 119.5 (d,  $J = 23.4$  Hz), 118.9 (d,  $J = 5.3$  Hz), 22.0, 21.6.  $^{19}\text{F}$  NMR (471 MHz, Chloroform-*d*)  $\delta$  -118.11 (td,  $J = 8.1, 5.0$  Hz).

HRMS (ESI-TOF): calculated for  $\text{C}_{23}\text{H}_{18}\text{FNO}_3$   $[\text{M}+\text{Na}]^+$ : 398.1163, found: 398.1158

### N-(2-(2-(4-methoxyphenyl)-2-oxoacetyl)phenyl)pivalamide (3f)

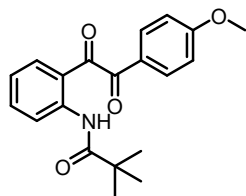

The title compound was prepared via the general procedure **B**, after purification by silica gel column chromatography (PE/EA = 8/1), **3f** was obtained as a white solid (54.6 mg, 0.161 mmol, 80%).  $R_f = 0.4$  (PE/EA = 4/1).

$^1\text{H}$  NMR (500 MHz, DMSO-*d*<sub>6</sub>)  $\delta$  10.98 (s, 1H), 8.33 (d,  $J = 8.4$  Hz, 1H), 7.97 (d,  $J = 8.8$  Hz, 2H), 7.73 (t,  $J = 7.3$  Hz, 1H), 7.64 – 7.59 (m, 1H), 7.24 (t,  $J = 7.6$  Hz, 1H), 7.13 (d,  $J = 8.8$  Hz, 2H), 3.88 (s, 3H), 1.17 (s, 9H).  $^{13}\text{C}$  NMR (125 MHz, DMSO-*d*<sub>6</sub>)  $\delta$  196.9, 190.9, 177.4, 164.8, 140.7, 136.1, 133.0, 132.8, 124.9, 123.6, 121.3, 114.7, 55.9, 26.9.

ESI-MS: calculated for  $\text{C}_{20}\text{H}_{21}\text{NO}_4$   $[\text{M}+\text{H}]^+$ : 340.1543, found: 340.1548.

### N-(5-methyl-2-(2-oxo-2-(p-tolyl)acetyl)phenyl)pivalamide (3g)

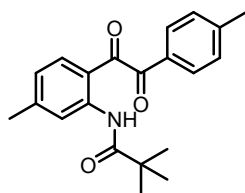

The title compound was prepared via the general procedure **B**, after purification by silica gel column chromatography (PE/EA = 8/1), **3g** was obtained as a white solid (44.2 mg, 0.130 mmol, 65%).  $R_f = 0.57$  (PE/EA = 4/1)

$^1\text{H}$  NMR (500 MHz, Chloroform-*d*)  $\delta$  11.68 (s, 1H), 8.80 (s, 1H), 7.85 (d,  $J$  = 8.2 Hz, 2H), 7.46 (d,  $J$  = 8.1 Hz, 1H), 7.34 (d,  $J$  = 8.0 Hz, 2H), 6.88 (d,  $J$  = 8.1 Hz, 1H), 2.47 (s, 3H), 2.43 (s, 3H), 1.41 (s, 9H).  $^{13}\text{C}$  NMR (125 MHz, Chloroform-*d*)  $\delta$  198.6, 193.2, 178.8, 149.1, 146.4, 142.9, 134.2, 130.5, 130.1, 129.9, 123.4, 121.0, 116.2, 40.6, 27.6, 22.6, 22.0.

HRMS (ESI-TOF): calculated for  $\text{C}_{21}\text{H}_{23}\text{NO}_3$   $[\text{M}+\text{Na}]^+$ : 360.1570, found: 360.1565.

### N-(2-(2-oxo-2-(*p*-tolyl)acetyl)pyridine-3-yl)acetamide (**3h**)

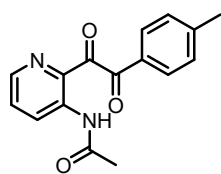

The title compound was prepared via the general procedure **B**, after purification by silica gel column chromatography (PE/EA = 8/1), **3h** was obtained as a white solid (25.7 mg, 0.091 mmol, 46%).  $R_f$  = 0.13 (PE/EA = 4/1).

$^1\text{H}$  NMR (500 MHz, DMSO-*d*<sub>6</sub>)  $\delta$  10.65 (s, 1H), 8.80 (dd,  $J$  = 8.6, 1.3 Hz, 1H), 8.34 (dd,  $J$  = 4.4, 1.3 Hz, 1H), 7.80 (d,  $J$  = 8.2 Hz, 2H), 7.72 (dd,  $J$  = 8.7, 4.4 Hz, 1H), 7.39 (d,  $J$  = 8.0 Hz, 2H), 2.40 (s, 3H), 2.24 (s, 3H).  $^{13}\text{C}$  NMR (125 MHz, DMSO-*d*<sub>6</sub>)  $\delta$  198.2, 195.1, 170.3, 146.3, 144.6, 138.4, 137.1, 130.7, 130.3, 130.2, 129.8, 129.7, 25.1, 21.9.

ESI-MS: calculated for  $\text{C}_{16}\text{H}_{14}\text{N}_2\text{O}_3$   $[\text{M}+\text{H}]^+$ : 283.1077, found: 283.1079.

### General Procedure C:

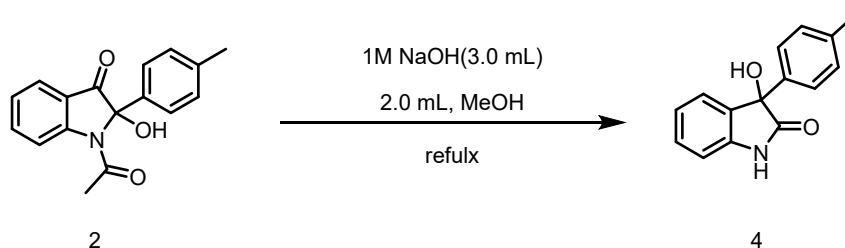

To a 25mL round bottom flask was added 0.2 mmol **2**, 2.0 mL methanol and 3.0 mL (1M NaOH). The reaction mixture was refluxed for 2-8h. After the reaction completed, saturated sodium bicarbonate solution was added, extracted with ethyl acetate, the organic phase was collected, dried with anhydrous sodium sulfate, and concentrated in vacuo. The crude product was purified by column chromatography to afford **4**

### 2-hydroxy-2-(*p*-tolyl)indolin-3-one (**4a**)

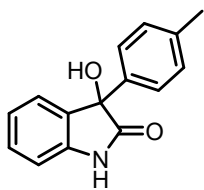

The title compound was prepared via the general procedure C, after purification by silica gel column chromatography (PE/EA = 2/1), **4a** was obtained as a White solid (81%). R<sub>f</sub> = 0.46 (PE/EA = 1/1).

<sup>1</sup>H NMR (500 MHz, DMSO-*d*<sub>6</sub>) δ 10.34 (s, 1H), 7.22 (t, *J* = 7.7 Hz, 1H), 7.17 (d, *J* = 8.1 Hz, 2H), 7.11 – 7.07 (m, 3H), 6.95 (t, *J* = 7.5 Hz, 1H), 6.89 (d, *J* = 7.7 Hz, 1H), 6.54 (s, 1H), 2.26 (s, 3H). <sup>13</sup>C NMR (125 MHz, DMSO-*d*<sub>6</sub>) δ 178.6, 141.9, 138.6, 136.5, 133.8, 129.1, 128.6, 125.4, 124.7, 121.9, 109.8, 77.2, 20.7.

HRMS (ESI-TOF): calculated for C<sub>15</sub>H<sub>13</sub>NO<sub>2</sub> [M+Na]<sup>+</sup>: 262.0838, found: 262.0838.

### 3-hydroxy-6-methyl-3-(p-tolyl)indolin-2-one (**4b**)

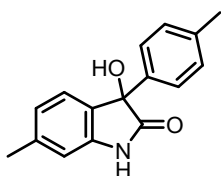

The title compound was prepared via the general procedure C, after purification by silica gel column chromatography (PE/EA = 2/1), **4b** was obtained as a White solid (95%). R<sub>f</sub> = 0.48 (PE/EA = 1/1).

<sup>1</sup>H NMR (500 MHz, DMSO-*d*<sub>6</sub>) δ 10.31 (s, 1H), 7.14 (d, *J* = 8.3 Hz, 2H), 7.10 (d, *J* = 8.2 Hz, 2H), 6.95 (d, *J* = 7.5 Hz, 1H), 6.77 (d, *J* = 7.5 Hz, 1H), 6.70 (s, 1H), 6.48 (s, 1H), 2.29 (s, 3H), 2.26 (s, 3H).

<sup>13</sup>C NMR (126 MHz, DMSO-*d*<sub>6</sub>) δ 179.3, 142.5, 139.2, 139.2, 136.9, 131.4, 129.0, 125.9, 125.0, 122.9, 110.9, 77.5, 21.8, 21.1.

ESI-MS: calculated for C<sub>16</sub>H<sub>15</sub>NO<sub>2</sub> [M+Na]<sup>+</sup>: 276.0994, found: 276.0995.

### 3-hydroxy-3-(m-tolyl)indolin-2-one (**4c**)

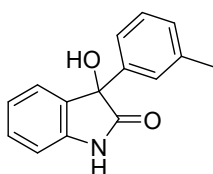

The title compound was prepared via the general procedure C, after purification by silica gel column chromatography (PE/EA = 2/1), **4c** was obtained as a White solid (72%). R<sub>f</sub> = 0.38 (PE/EA = 1/1).

<sup>1</sup>H NMR (500 MHz, DMSO-*d*<sub>6</sub>) δ 10.39 (s, 1H), 7.24 (t, *J* = 7.5 Hz, 1H), 7.18 (t, *J* = 7.6 Hz, 1H), 7.11 (s, 1H), 7.07 (t, *J* = 6.8 Hz, 2H), 7.03 (d, *J* = 7.7 Hz, 1H), 6.96 (t, *J* = 7.4 Hz, 1H), 6.89 (d, *J* = 7.7 Hz, 1H), 6.58 (s, 1H), 2.26 (s, 3H).

<sup>13</sup>C NMR (125MHz, DMSO-*d*<sub>6</sub>) δ 179.0, 142.4, 142.0, 137.6, 134.3, 129.7, 128.5, 128.5, 126.3, 125.2, 123.0, 122.5, 110.3, 77.7, 21.6.

### 3-(3-chlorophenyl)-3-hydroxyindolin-2-one (**4d**)

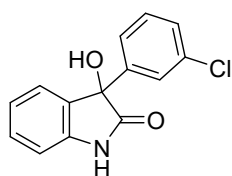

The title compound was prepared via the general procedure C, after purification by silica gel column chromatography (PE/EA = 2/1), **4d** was obtained as a White solid (80%). R<sub>f</sub> = 0.42 (PE/EA = 1/1).

<sup>1</sup>H NMR (500 MHz, DMSO-*d*<sub>6</sub>) δ 10.50 (s, 1H), 7.37 – 7.31 (m, 3H), 7.28 (td, *J* = 7.7, 1.2 Hz, 1H), 7.12 (d, *J* = 7.2 Hz, 1H), 7.10 – 7.07 (m, 1H), 7.01 – 6.97 (m, 1H), 6.92 (d, *J* = 7.7 Hz, 1H), 6.83 (s, 1H).

<sup>13</sup>C NMR (125MHz, DMSO-*d*<sub>6</sub>) δ 178.3, 144.4, 142.4, 133.4, 133.4, 130.6, 130.1, 128.0, 125.8, 125.3, 124.6, 122.8, 110.5, 77.4.

### 3-hydroxy-3-(thiophen-3-yl)indolin-2-one (**4e**)

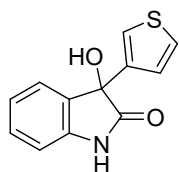

The title compound was prepared via the general procedure C, after purification by silica gel column chromatography (PE/EA = 2/1), **4e** was obtained as a White solid (69%). R<sub>f</sub> = 0.44 (PE/EA = 1/1).

$^1\text{H}$  NMR (500 MHz,  $\text{DMSO-}d_6$ )  $\delta$  10.39 (s, 1H), 7.47 (dd,  $J = 5.0, 3.0$  Hz, 1H), 7.28 – 7.23 (m, 2H), 7.21 (dd,  $J = 3.0, 1.2$  Hz, 1H), 7.02 (dd,  $J = 5.1, 1.2$  Hz, 1H), 6.99 (td,  $J = 8.3, 7.6, 0.8$  Hz, 1H), 6.90 – 6.86 (m, 1H), 6.60 (s, 1H).

$^{13}\text{C}$  NMR (125MHz,  $\text{DMSO-}d_6$ )  $\delta$  178.3, 142.9, 142.0, 133.4, 129.7, 126.9, 126.7, 125.2, 122.6, 122.4, 110.3, 76.0.

### 5-fluoro-3-hydroxy-3-(p-tolyl)indolin-2-one (4f)

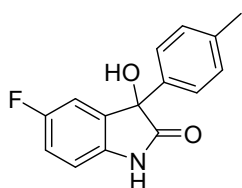

The title compound was prepared via the general procedure C, after purification by silica gel column chromatography (PE/EA = 2/1), **4f** was obtained as a White solid (57%).  $R_f = 0.32$  (PE/EA = 1/1).

$^1\text{H}$  NMR (500 MHz,  $\text{DMSO-}d_6$ )  $\delta$  10.41 (s, 1H), 7.14 (q,  $J = 8.4$  Hz, 4H), 7.11 – 7.07 (m, 1H), 6.94 (dd,  $J = 8.0, 2.7$  Hz, 1H), 6.89 (dd,  $J = 8.5, 4.3$  Hz, 1H), 6.70 (s, 1H), 2.27 (s, 3H).  $^{13}\text{C}$  NMR (125 MHz,  $\text{DMSO-}d_6$ )  $\delta$  179.0, 159.6, 157.7, 138.5, 137.3, 136.0, 135.9, 129.2, 125.8, 116.0, 115.8, 112.8, 112.6, 111.2, 111.2, 77.9, 21.1.

$^{19}\text{F}$  NMR (471 MHz,  $\text{DMSO-}d_6$ )  $\delta$  -121.31 (d,  $J = 13.4$  Hz).

### 5-bromo-3-hydroxy-3-(p-tolyl)indolin-2-one (4g)

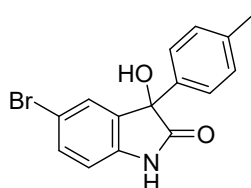

The title compound was prepared via the general procedure C, after purification by silica gel column chromatography (PE/EA = 2/1), **4g** was obtained as a White solid (70%).  $R_f = 0.45$  (PE/EA = 1/1).

$^1\text{H}$  NMR (500 MHz,  $\text{DMSO-}d_6$ )  $\delta$  10.55 (s, 1H), 7.43 (dd,  $J = 8.3, 2.1$  Hz, 1H), 7.20 (d,  $J = 2.0$  Hz, 1H), 7.18 – 7.12 (m, 4H), 6.88 (d,  $J = 8.3$  Hz, 1H), 6.74 (s, 1H), 2.27 (s, 3H).

$^{13}\text{C}$  NMR (125 MHz,  $\text{DMSO-}d_6$ )  $\delta$  178.5, 141.7, 138.3, 137.4, 136.7, 132.3, 129.3, 127.8, 125.7, 114.1, 112.4, 77.7, 21.1

### 3-hydroxy-4-methyl-3-(p-tolyl)indolin-2-one (4h)

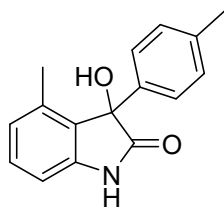

The title compound was prepared via the general procedure C, after purification by silica gel column chromatography (PE/EA = 2/1), **4h** was obtained as a White solid (48%). R<sub>f</sub> = 0.40 (PE/EA = 1/1).

<sup>1</sup>H NMR (500 MHz, DMSO-*d*<sub>6</sub>) δ 10.28 (s, 1H), 7.16 (d, *J* = 7.7 Hz, 1H), 7.11 (s, 4H), 6.73 (dd, *J* = 7.5, 5.0 Hz, 2H), 6.44 (s, 1H), 2.27 (s, 3H), 1.92 (s, 3H).

<sup>13</sup>C NMR (125 MHz, DMSO-*d*<sub>6</sub>) δ 179.0, 142.6, 137.7, 136.8, 135.9, 131.6, 129.6, 129.1, 125.5, 124.3, 107.8, 78.0, 39.4, 21.1, 17.4.

ESI-MS: calculated for C<sub>16</sub>H<sub>15</sub>NO<sub>2</sub> [M+Na]<sup>+</sup>: 276.0994, found: 276.0996.

### 5 Gram-scale experiment and further functionalization of 2a

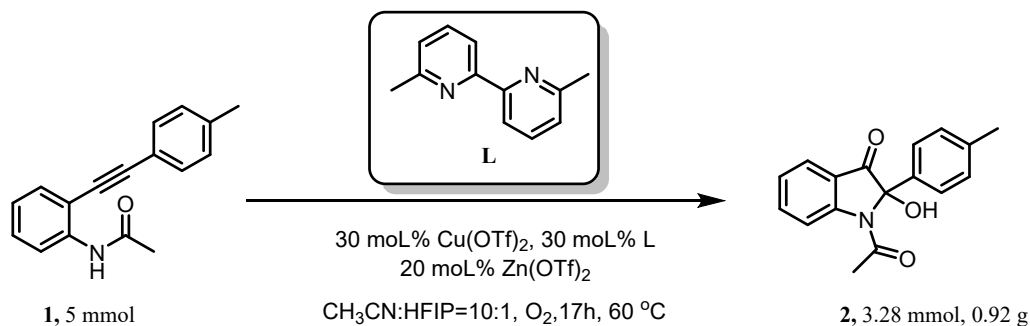

To a 100 mL round bottom flask was added **1** (5.0 mol, 1.0 eq.) and Cu(OTf)<sub>2</sub> (542 mg, 30 mol%), **L** (273.4 mg, 30 mol%) and Zn(OTf)<sub>2</sub> (363 mg, 20 mol%), MeCN (50.0 mL) and HFIP (5.0 mL). The reaction mixture was carried out under oxygen for 17 hours. The reaction was detected by TLC. After the reaction was complete, the organic phase was extracted three times with ethyl acetate and saturated brine and dried over Na<sub>2</sub>SO<sub>4</sub>. The organic phase obtained was concentrated in vacuo and column chromatographed with PE/EA (4:1) to **2** (69%) of the product.

### Transformation of 2a to 5

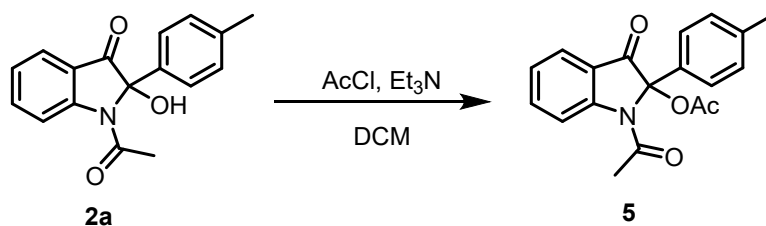

To a 25 mL round-bottom flask was added **2a** (0.2 mmol), 2.0 mL DCM, and Et<sub>3</sub>N (1.0 mL). The reaction mixture was stirred under rt for 10 min, then 0.3 mL AcCl was added to the reaction mixture and stirred for 1 hour. The reaction was detected by TLC. After the reaction was complete, the organic phase was extracted three times with ethyl acetate and saturated brine and dried over Na<sub>2</sub>SO<sub>4</sub>. A white solid product (32.9 mg, 51%) was obtained by silica gel column chromatography (PE/EA = 4/1).

White solid (32.9 mg, 51 %). R<sub>f</sub> = 0.46 (PE/EA = 4/1).

<sup>1</sup>H NMR (500 MHz, Chloroform-d) δ 8.69 (d, J = 8.4 Hz, 1H), 7.74 (t, J = 7.7 Hz, 2H), 7.32 (d, J = 8.3 Hz, 2H), 7.28 (t, J = 7.9 Hz, 1H), 7.22 (d, J = 8.0 Hz, 2H), 2.36 (s, 3H), 2.29 (s, 3H), 2.06 (s, 3H).

<sup>13</sup>C NMR (125 MHz, DMSO-d<sub>6</sub>) δ 187.0, 165.0, 163.4, 147.3, 135.3, 132.7, 125.7, 125.4, 120.2, 120.2, 120.1, 116.4, 113.1, 86.2, 20.1, 16.4, 15.8.

ESI-MS: calculated for C<sub>19</sub>H<sub>17</sub>NO<sub>4</sub> [M+Na]<sup>+</sup>: 346.1049, found: 346.1050.

### Transformation of **2a** to **6**<sup>[3]</sup>

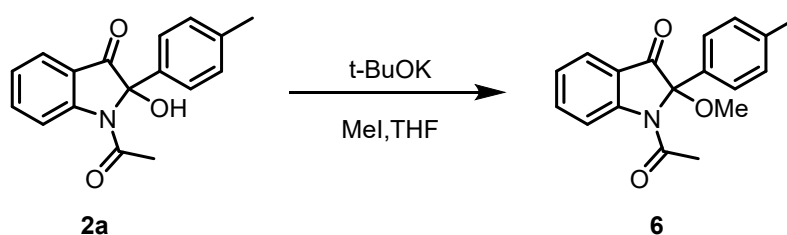

To a 25 mL round-bottom flask, was added **2a** (56.3 mg, 0.2 mmol) and 2.0 mL dry THF. To the reaction mixture was added 1M *t*-BuOK (0.3 mL) dropwise at room temperature. After stirring for 2 hours, MeI (5.0 eq.) dissolved in 2.0 mL dry THF was added dropwise at room temperature and the mixture was stirred at temperature overnight. The reaction mixture was diluted with H<sub>2</sub>O and extracted with EA (3 × 30 mL). The organic phase was dried with dry Na<sub>2</sub>SO<sub>4</sub>, concentrated in vacuum, and silica column chromatography to obtain **6** as a white solid (25.9 mg, 0.088 mmol, 46 %). R<sub>f</sub> = 0.37 (PE/EA = 4/1).



$^1\text{H}$  NMR (500 MHz,  $\text{DMSO-}d_6$ )  $\delta$  8.66 (d,  $J$  = 8.4 Hz, 1H), 7.89 (ddd,  $J$  = 8.6, 7.4, 1.4 Hz, 1H), 7.75 – 7.72 (m, 1H), 7.37 – 7.33 (m, 1H), 7.22 (s, 4H), 3.26 (s, 3H), 2.28 (s, 3H), 1.90 (s, 3H).  
 $^{13}\text{C}$  NMR (125 MHz,  $\text{DMSO-}d_6$ )  $\delta$  195.4, 170.3, 153.9, 139.4, 133.0, 130.3, 125.6, 125.3, 125.1, 120.8, 118.0, 94.9, 52.0, 24.3, 21.1.

HRMS (ESI-TOF): calculated for  $\text{C}_{18}\text{H}_{17}\text{NO}_3$   $[\text{M}+\text{Na}]^+$ : 318.1100, found: 318.1102.

#### Transformation of **2a** to **7**<sup>[4]</sup>

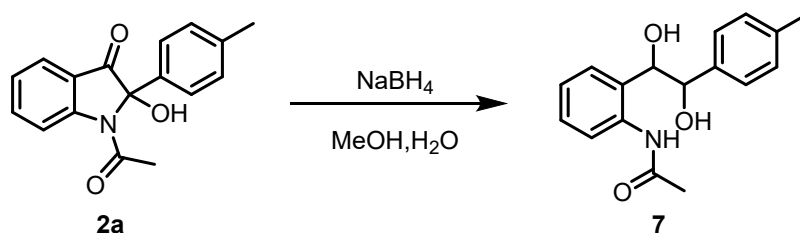

To a 25 mL round bottom flask was added **2a** (0.2 mmol), 3.0 mL methanol, and 0.2 mL  $\text{H}_2\text{O}$ . Under the condition of the ice bath, 5.0 equivalent of  $\text{NaBH}_4$  was added, and the reaction was stirred for 30 minutes. The reaction mixture was allowed to warm to room temperature. After stirring for 1 h, the mixture was diluted with  $\text{CHCl}_3$ , wash with  $\text{H}_2\text{O}$ . The organic solvent is dried with anhydrous sodium sulfate, Column chromatography with PE/EA (1/1) to obtain **7** as a white solid (42.7 mg, 0.150 mmol, 75 %).  $R_f$  = 0.29 (PE/EA = 1/2).

$^1\text{H}$  NMR (500 MHz,  $\text{DMSO-}d_6$ )  $\delta$  9.46 (s, 1H), 7.69 (d,  $J$  = 7.8 Hz, 1H), 7.18 (t,  $J$  = 7.3 Hz, 2H), 7.14 (d,  $J$  = 7.9 Hz, 2H), 7.07 (d,  $J$  = 7.9 Hz, 2H), 7.04 – 7.00 (m, 1H), 5.69 (d,  $J$  = 4.7 Hz, 1H), 5.60 (d,  $J$  = 4.4 Hz, 1H), 4.78 (dd,  $J$  = 6.3, 4.5 Hz, 1H), 4.57 (d,  $J$  = 5.2 Hz, 1H), 2.27 (s, 3H), 2.02 (s, 3H).

$^{13}\text{C}$  NMR (125 MHz,  $\text{DMSO-}d_6$ )  $\delta$  168.2, 140.4, 136.9, 136.2, 134.6, 128.6, 128.4, 127.7, 127.3, 124.1, 123.5, 77.1, 75.1, 24.5, 21.2.

HRMS (ESI-TOF): calculated for  $\text{C}_{17}\text{H}_{19}\text{NO}_3$   $[\text{M}+\text{Na}]^+$ : 308.1257, found: 308.1258.

#### Synthetic Transformation of **2a** to **8**<sup>[5]</sup>

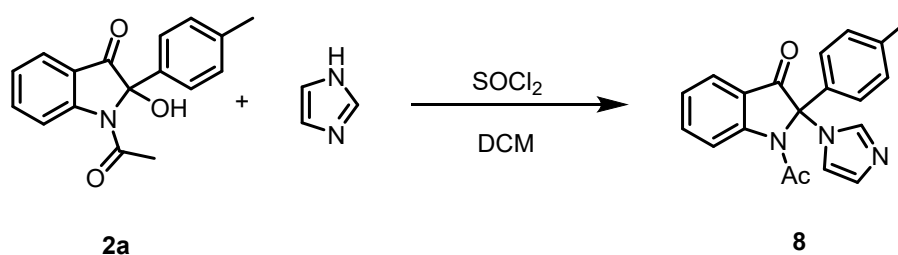

To a solution of imidazole (109 mg, 5.6 mmol) in DCM (2.0 mL) was added SOCl<sub>2</sub> (40 μL) at 0 °C. After the reaction mixture was stirred for 5 min at 0 °C, **2a** (56.3 mg, 0.2 mmol) was added with stirring. After 1 h, the reaction mixture was diluted with H<sub>2</sub>O and extracted with DCM (3 × 10 mL). The combined organic layers were washed with brine (10 mL) and dried over Na<sub>2</sub>SO<sub>4</sub>, and then concentrated under reduced pressure. A white solid product (30.1 mg, 0.091 mmol, 45 %) was obtained by silica gel column chromatography (PE/EA = 32/1).

White solid (30.1 mg, 0.091 mmol, 45%). R<sub>f</sub> = 0.57 (PE/EA = 32/1).

<sup>1</sup>H NMR (500 MHz, Chloroform-*d*) δ 8.61 (s, 1H), 7.80 – 7.74 (m, 2H), 7.72 (s, 1H), 7.46 (d, *J* = 8.2 Hz, 2H), 7.29 (t, *J* = 7.4 Hz, 1H), 7.24 (s, 2H), 7.13 (s, 1H), 6.94 (s, 1H), 2.36 (s, 3H), 1.85 (s, 3H).

<sup>13</sup>C NMR (125 MHz, Chloroform-*d*) δ 192.2, 169.8, 152.5, 140.9, 138.8, 137.6, 130.2, 130.1, 127.3, 125.9, 125.6, 119.4, 118.8, 118.1, 81.4, 25.1, 21.2.

ESI-MS: calculated for C<sub>20</sub>H<sub>17</sub>N<sub>3</sub>O<sub>2</sub> [M+H]<sup>+</sup>: 332.1393, found: 332.1391.

## 6 Mechanistic study

### 6.1 Radical Quenching Experiment

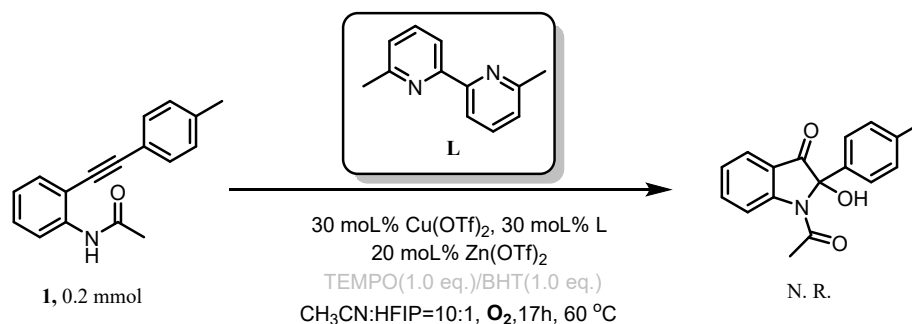

To a 15 mL-schlenk tube charged with a stirring bar, was added **1** (0.2 mmol, 1.0 eq.), Cu(OTf)<sub>2</sub> (21.8 mg, 30 mol%), **L** (10.9 mg, 30 mol%), Zn(OTf)<sub>2</sub> (14.6 mg, 20 mol%), and TEMPO (31.3 mg, 1.0 eq.) or BHT (44.1 mg, 1.0 eq.) in 2.2 mL of MeCN/HFIP (10/1). The reaction was carried out under oxygen for 17 hours. Product **2** was not observed by TLC.

### 6.2 Reaction commenced under N<sub>2</sub> atmosphere

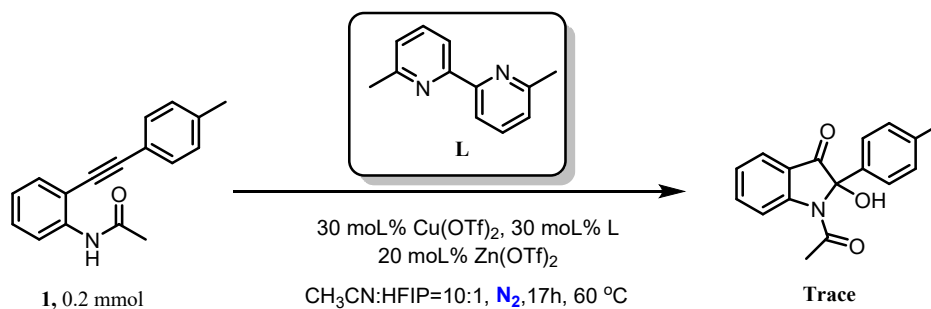

To a 15 mL-schlenk tube charged with a stirring bar was added **1** (0.2 mmol, 1.0 eq.), Cu(OTf)<sub>2</sub> (21.8 mg, 30 mol%), **L** (10.9 mg, 30 mol%) and Zn(OTf)<sub>2</sub> (14.6 mg, 20 mol% in 2.2 mL of MeCN/HFIP (10/1). The reaction was carried out under nitrogen for 17 hours. Product **2** was not observed by TLC.

### 6.3 <sup>18</sup>O labeling experiments

Q-TOF data of **2a** for the reaction in the presence of <sup>18</sup>O<sub>2</sub> and H<sub>2</sub><sup>18</sup>O.

#### (i) O<sub>2</sub>-<sup>18</sup>O labeling experiments

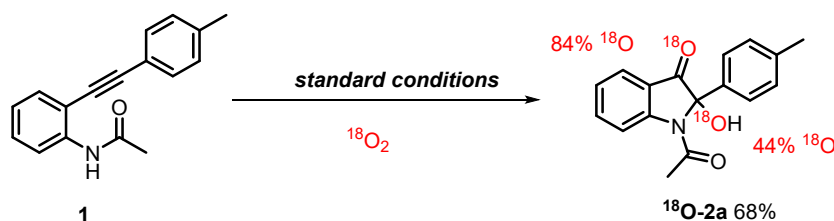

Reaction conditions: **1** (0.2 mmol), Cu(OTf)<sub>2</sub> (30 mol%), Zn(OTf)<sub>2</sub> (20 mol%), 6,6'- dimethyl -2,2'-dipyridyl (30 mol%) in 10:1 MeCN/HFIP (2.2 mL), 60 °C under <sup>18</sup>O<sub>2</sub> atmosphere (1 atm) for 17 h. Isolated yield. The percentage of <sup>18</sup>O was determined by Q-TOF.

The Q-TOF spectra of <sup>18</sup>O-**2a** for the reaction under <sup>18</sup>O<sub>2</sub> atmosphere

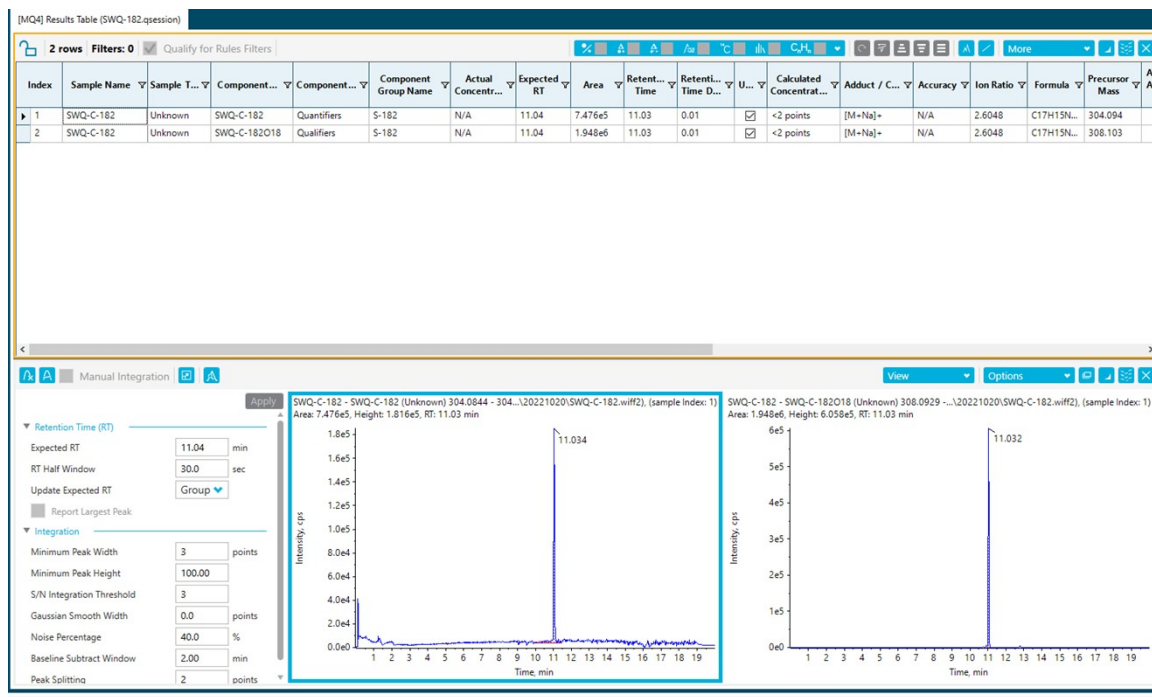

The Q-TOF spectra of  $^{18}\text{O}$ -**2a** for the reaction under  $^{18}\text{O}_2$  atmosphere

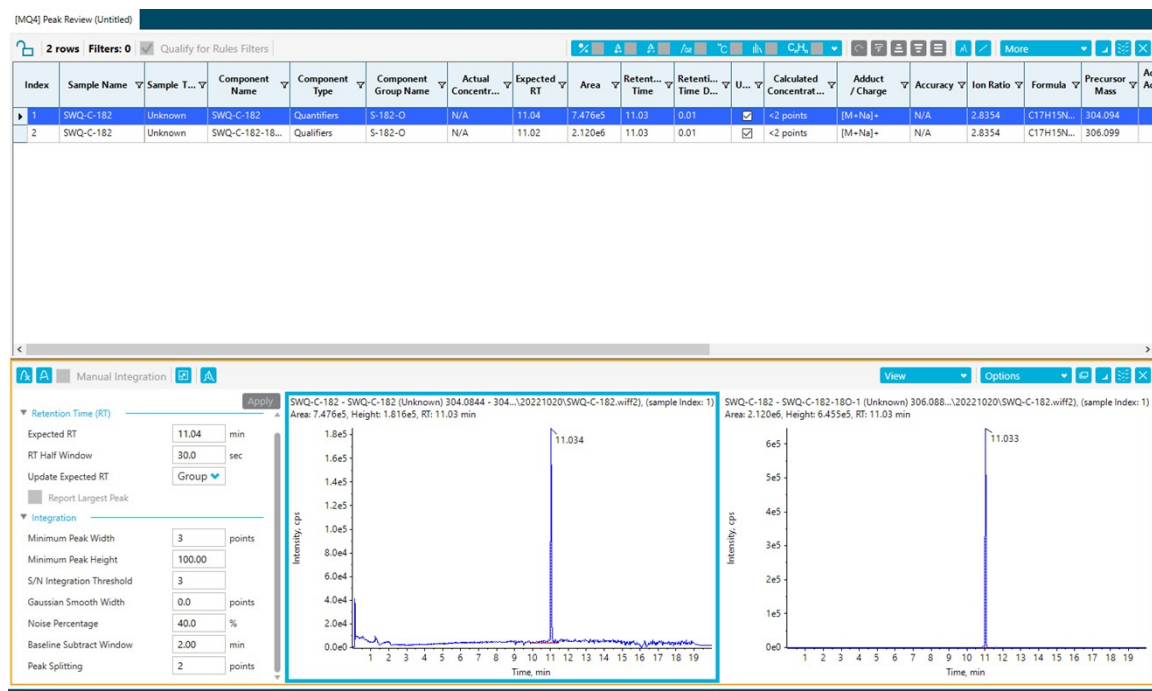

(ii)  $\text{H}_2^{18}\text{O}$ - $^{18}\text{O}$  labeling experiments

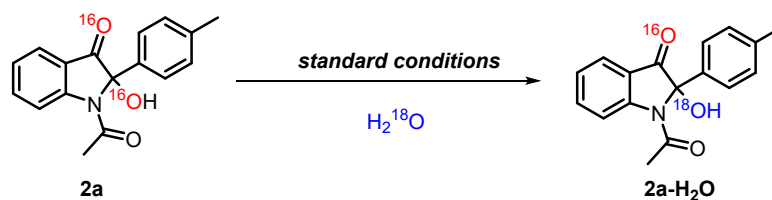

Reaction conditions: **1** (0.2 mmol), Cu(OTf)<sub>2</sub> (30 mol%), Zn(OTf)<sub>2</sub> (20 mol%), 6,6'- dimethyl -2,2'-dipyridyl (30 mol%), and H<sub>2</sub><sup>18</sup>O (5.0 equiv) in 10:1 MeCN/HFIP (2.2 mL) with stirring at 60 °C for 17 - 24 h. Isolated yield. The percentage of <sup>18</sup>O was determined by Q-TOF.

The Q-TOF spectra of **2a-H<sub>2</sub>O** for the reaction in H<sub>2</sub><sup>18</sup>O (5.0 equiv) (13%)

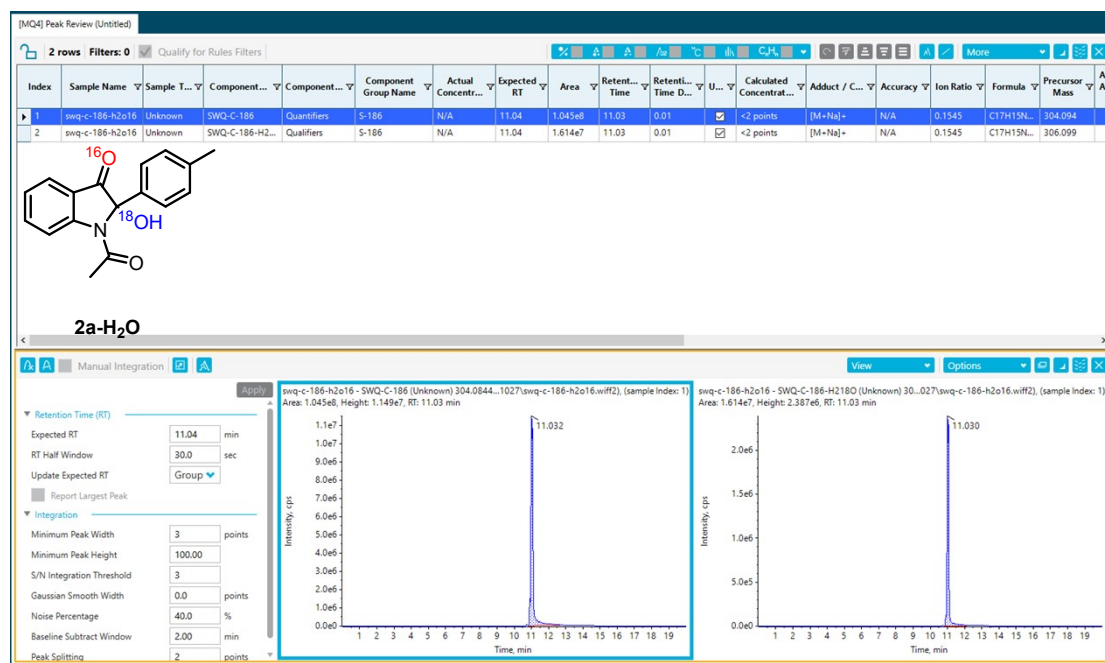

## 6.4 Trapping experiment of <sup>1</sup>O<sub>2</sub>

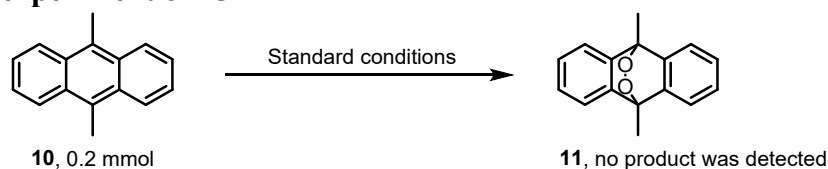

To a 15 mL-schlenk tube charged with a stirring bar was added **10** (0.2 mmol, 1.0 eq.), Cu(OTf)<sub>2</sub> (21.8 mg, 30 mol%), **L** (10.9 mg, 30 mol%) and Zn(OTf)<sub>2</sub> (14.6 mg, 20 mol% in 2.2 mL of MeCN/HFIP (10/1). The reaction was carried out under nitrogen for 17 hours. Product **11** was not observed by TLC and LC-MS.

## 7 X-ray crystallographic data

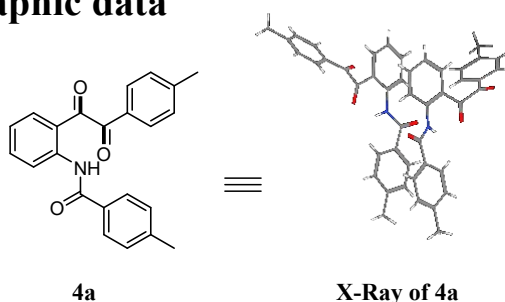

|                                             |                                                               |
|---------------------------------------------|---------------------------------------------------------------|
| CCDC number                                 | <b>2237535</b>                                                |
| Identification code                         | <b>4a</b>                                                     |
| Empirical formula                           | C <sub>23</sub> H <sub>19</sub> NO <sub>3</sub>               |
| Formula weight                              | 357.39                                                        |
| Temperature/K                               | 296.89(18)                                                    |
| Crystal system                              | triclinic                                                     |
| Space group                                 | P-1                                                           |
| a/Å                                         | 7.90540(10)                                                   |
| b/Å                                         | 13.1683(3)                                                    |
| c/Å                                         | 19.1538(4)                                                    |
| α/°                                         | 90.215(2)                                                     |
| β/°                                         | 96.665(2)                                                     |
| γ/°                                         | 106.787(2)                                                    |
| Volume/Å <sup>3</sup>                       | 1894.59(7)                                                    |
| Z                                           | 4                                                             |
| ρ <sub>calc</sub> /cm <sup>3</sup>          | 1.253                                                         |
| μ/mm <sup>-1</sup>                          | 0.668                                                         |
| F(000)                                      | 752.0                                                         |
| Crystal size/mm <sup>3</sup>                | 0.23 × 0.2 × 0.15                                             |
| Radiation                                   | Cu Kα (λ = 1.54184)                                           |
| 2θ range for data collection/°              | 7.016 to 155.276                                              |
| Index ranges                                | -9 ≤ h ≤ 9, -16 ≤ k ≤ 16, -24 ≤ l ≤ 18                        |
| Reflections collected                       | 24273                                                         |
| Independent reflections                     | 7566 [R <sub>int</sub> = 0.0247, R <sub>sigma</sub> = 0.0256] |
| Data/restraints/parameters                  | 7566/0/491                                                    |
| Goodness-of-fit on F <sup>2</sup>           | 1.040                                                         |
| Final R indexes [I ≥ 2σ (I)]                | R <sub>1</sub> = 0.0555, wR <sub>2</sub> = 0.1459             |
| Final R indexes [all data]                  | R <sub>1</sub> = 0.0668, wR <sub>2</sub> = 0.1540             |
| Largest diff. peak/hole / e Å <sup>-3</sup> | 0.23/-0.17                                                    |

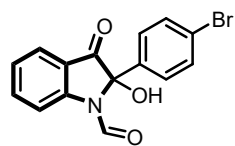

2v

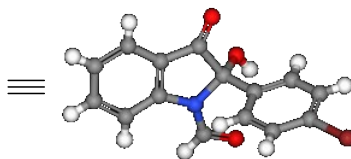

X-Ray of 2v

|                                                              |                                                                            |
|--------------------------------------------------------------|----------------------------------------------------------------------------|
| CCDC number                                                  | 2237688                                                                    |
| Empirical formula                                            | C <sub>17</sub> H <sub>14</sub> BrNO <sub>4</sub>                          |
| Formula weight                                               | 376.15                                                                     |
| Temperature [K]                                              | 298.19(10)                                                                 |
| Crystal system                                               | monoclinic                                                                 |
| Space group (number)                                         | <i>C</i> 2/ <i>c</i> (15)                                                  |
| <i>a</i> [Å]                                                 | 24.4178(4)                                                                 |
| <i>b</i> [Å]                                                 | 5.70910(10)                                                                |
| <i>c</i> [Å]                                                 | 26.1253(4)                                                                 |
| $\alpha$ [°]                                                 | 90                                                                         |
| $\beta$ [°]                                                  | 112.314(2)                                                                 |
| $\gamma$ [°]                                                 | 90                                                                         |
| Volume [Å <sup>3</sup> ]                                     | 3369.24(11)                                                                |
| <i>Z</i>                                                     | 8                                                                          |
| $\rho_{\text{calc}}$ [gcm <sup>-3</sup> ]                    | 1.483                                                                      |
| $\mu$ [mm <sup>-1</sup> ]                                    | 3.381                                                                      |
| <i>F</i> (000)                                               | 1328                                                                       |
| Crystal size [mm <sup>3</sup> ]                              | 0.25×0.24×0.2                                                              |
| Crystal colour                                               | colourless                                                                 |
| Crystal shape                                                | block                                                                      |
| Radiation                                                    | Cu <i>K</i> <sub>α</sub> ( $\lambda$ =1.54184 Å)                           |
| 2 $\theta$ range [°]                                         | 7.32 to 152.54 (0.79 Å)                                                    |
| Index ranges                                                 | -28 ≤ <i>h</i> ≤ 30, -4 ≤ <i>k</i> ≤ 7, -32 ≤ <i>l</i> ≤ 31                |
| Reflections collected                                        | 10924                                                                      |
| Independent reflections                                      | 3350, <i>R</i> <sub>int</sub> = 0.0213, <i>R</i> <sub>sigma</sub> = 0.0202 |
| Completeness to $\theta$ = 67.684°                           | 99.8 %                                                                     |
| Data / Restraints / Parameters                               | 3350/0/182                                                                 |
| Goodness-of-fit on <i>F</i> <sup>2</sup>                     | 1.053                                                                      |
| Final <i>R</i> indexes [ <i>I</i> ≥ 2 $\sigma$ ( <i>I</i> )] | <i>R</i> <sub>1</sub> = 0.0401, <i>wR</i> <sub>2</sub> = 0.1212            |
| Final <i>R</i> indexes [all data]                            | <i>R</i> <sub>1</sub> = 0.0419, <i>wR</i> <sub>2</sub> = 0.1230            |
| Largest peak/hole [eÅ <sup>-3</sup> ]                        | 1.02/-0.76                                                                 |
| Empirical formula                                            | 3350/0/182                                                                 |
| Formula weight                                               | 1.053                                                                      |

## References:

- [1] Amol Milind Garkhedkar, Babasaheb Sopan Gore, Wan-Ping Hu, and Jeh-Jeng Wang., Lewis Acid Catalyzed Atom-Economic Synthesis of C2-Substituted Indoles from o-Amido Alkynols. *Org. Lett.* **2020**, 22(9); 3531–3536.
- [2] Shrikant D. Tambe, Naeem Iqbal, and Eun Jin Cho., Nickel Catalyzed trans-Carboamination across Internal Alkynes to Access Multifunctionalized Indoles. *Org. Lett.* **2020**, 22(21); 8550–8554
- [3] Kanako Nozawa-Kumada, Yuta Matsuzawa, Kanako Ono, Masanori Shigeno, Yoshinori Kondo, Copper-catalyzed aerobic double functionalization of benzylic C(sp<sup>3</sup>)–H bonds for the synthesis of 3-hydroxyisoindolinones. *Chem. Commun.* **2021**, 57, 8604.
- [4] Chun-Sheng Chien, Atsushi Hasegawa, Tomomi Kawasaki, Masanori Sakamoto, A Novel Synthesis of 1-Acylindoxyls. *Chem. Pharm. Bull.* **1986**, 34( 4 ); 1493 - 1496.
- [5] Anna E Cholewczynski, Peyton C Williams, Joshua G Pierce, Stereocontrolled Synthesis of (±)-Melokhanine E via an Intramolecular Formal [3 + 2] Cycloaddition. *Org. Lett.* **2020**, 22, 714–717.



# 8 NMR Spectra. <sup>1</sup>H NMR, <sup>13</sup>C NMR and <sup>19</sup>F NMR

## 1-acetyl-2-hydroxy-2-(p-tolyl)indolin-3-one (2a)

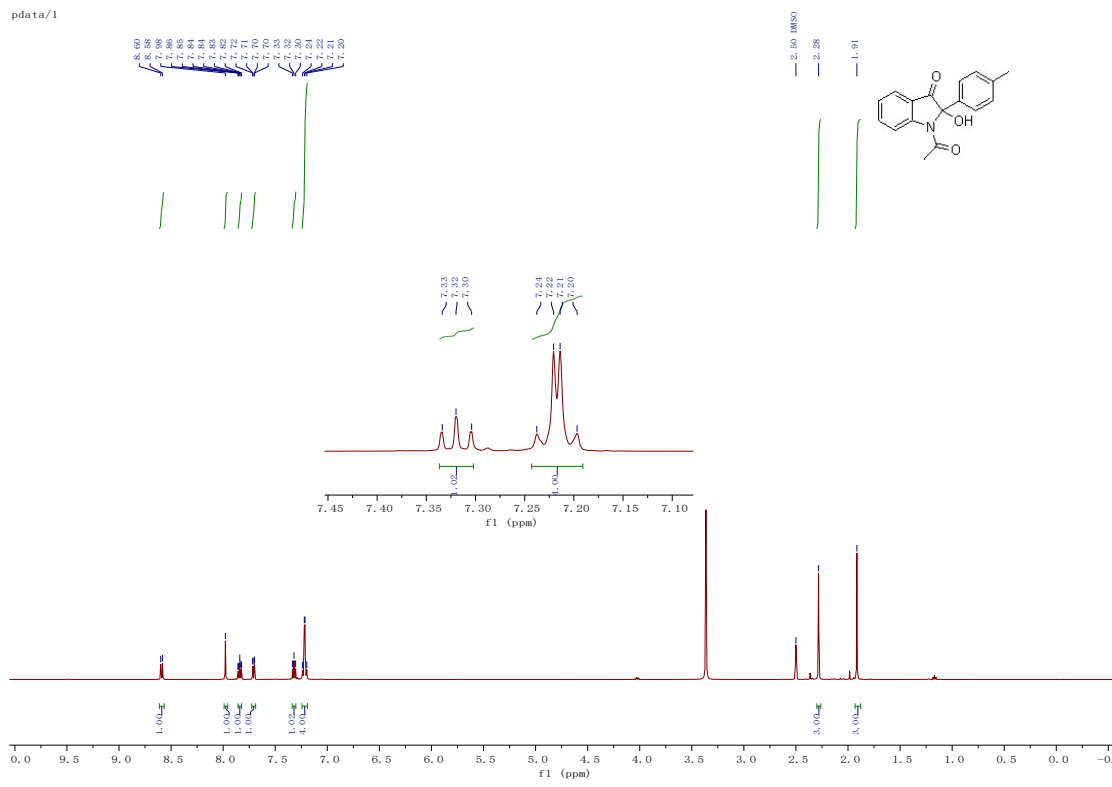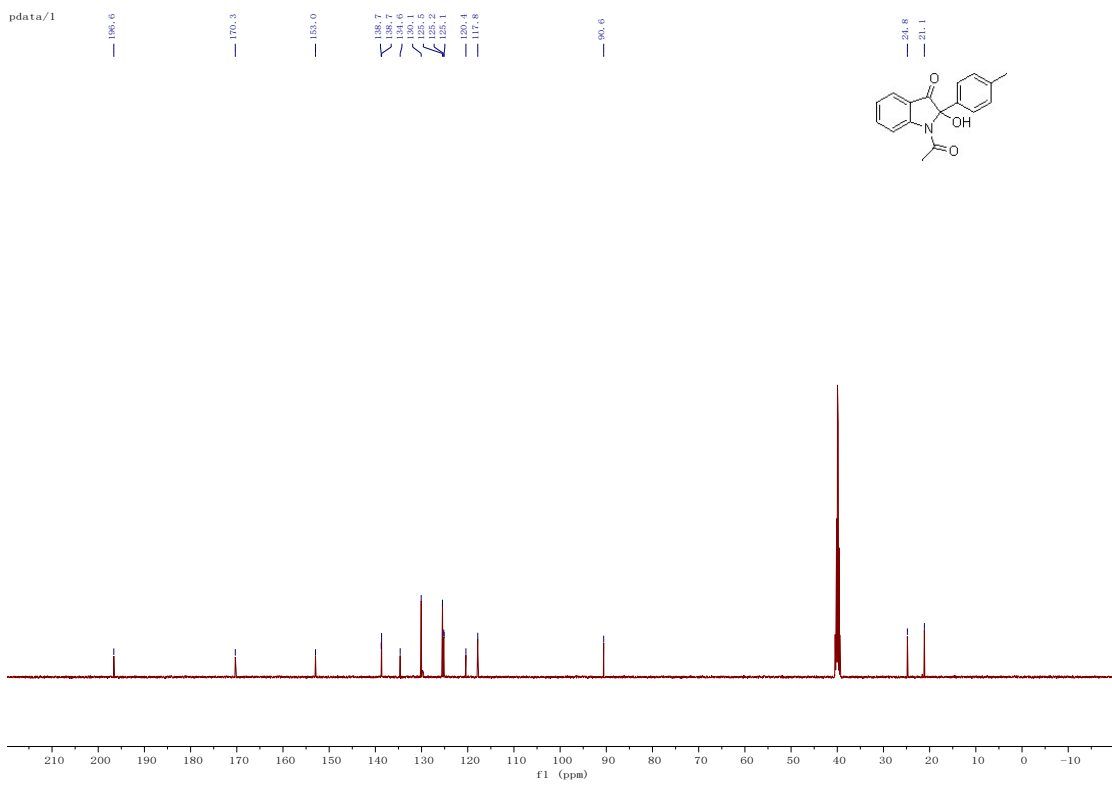

# 1-acetyl-2-hydroxy-2-(4-methoxyphenyl)indolin-3-one (2b)

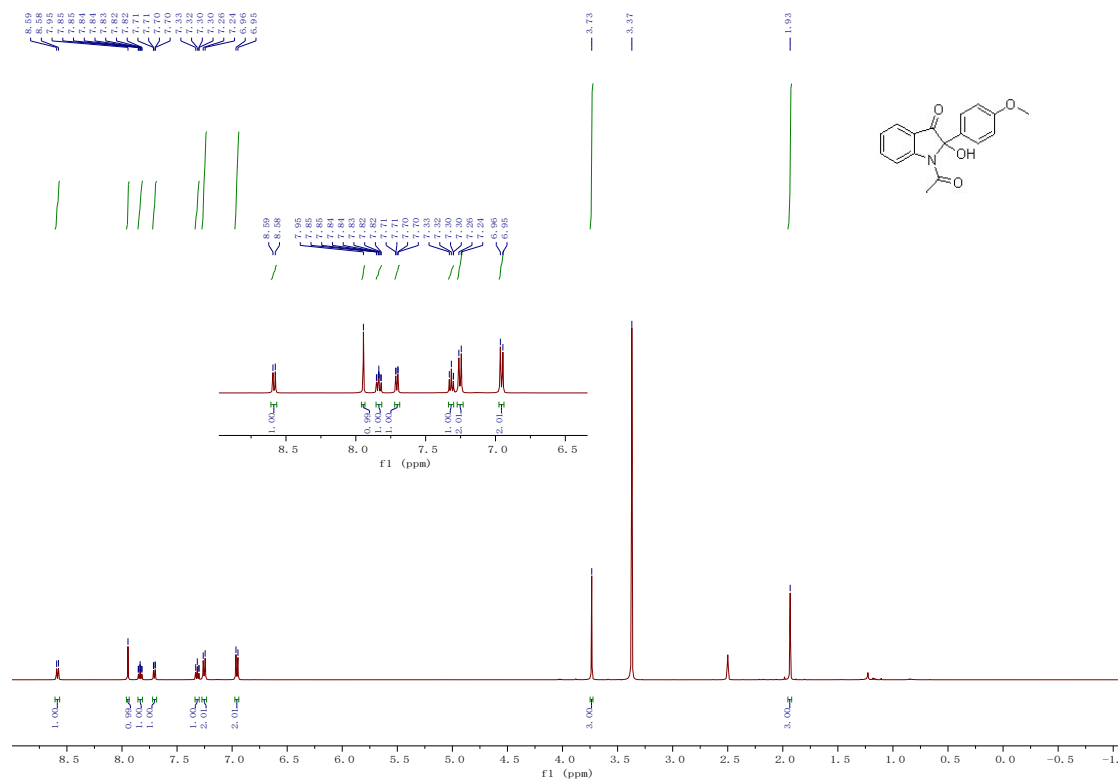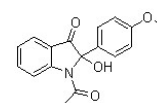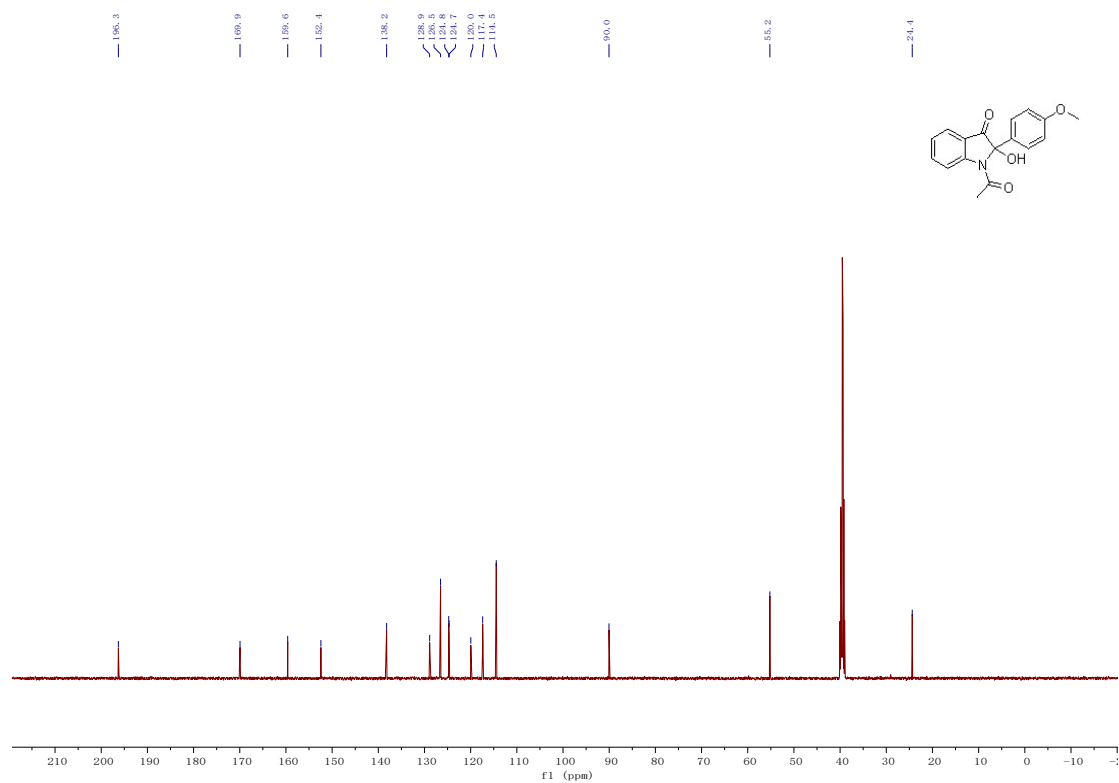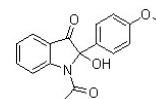

# 1-acetyl-2-(4-bromophenyl)-2-hydroxyindolin-3-one (2c)

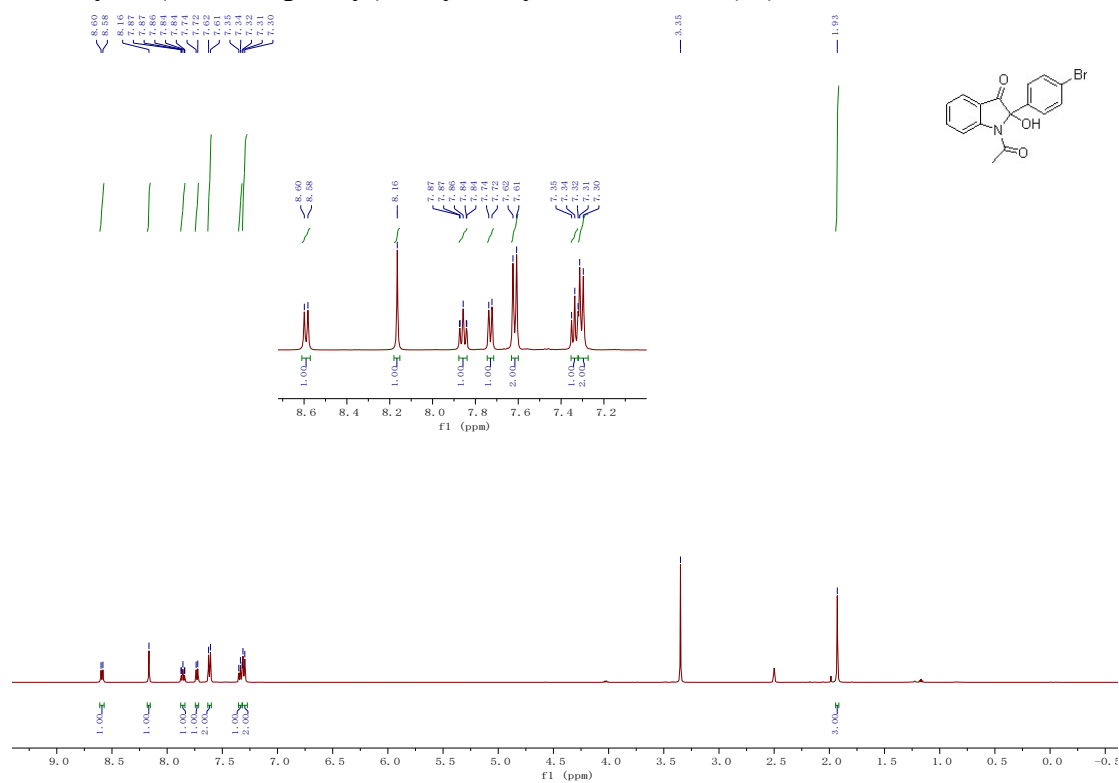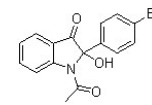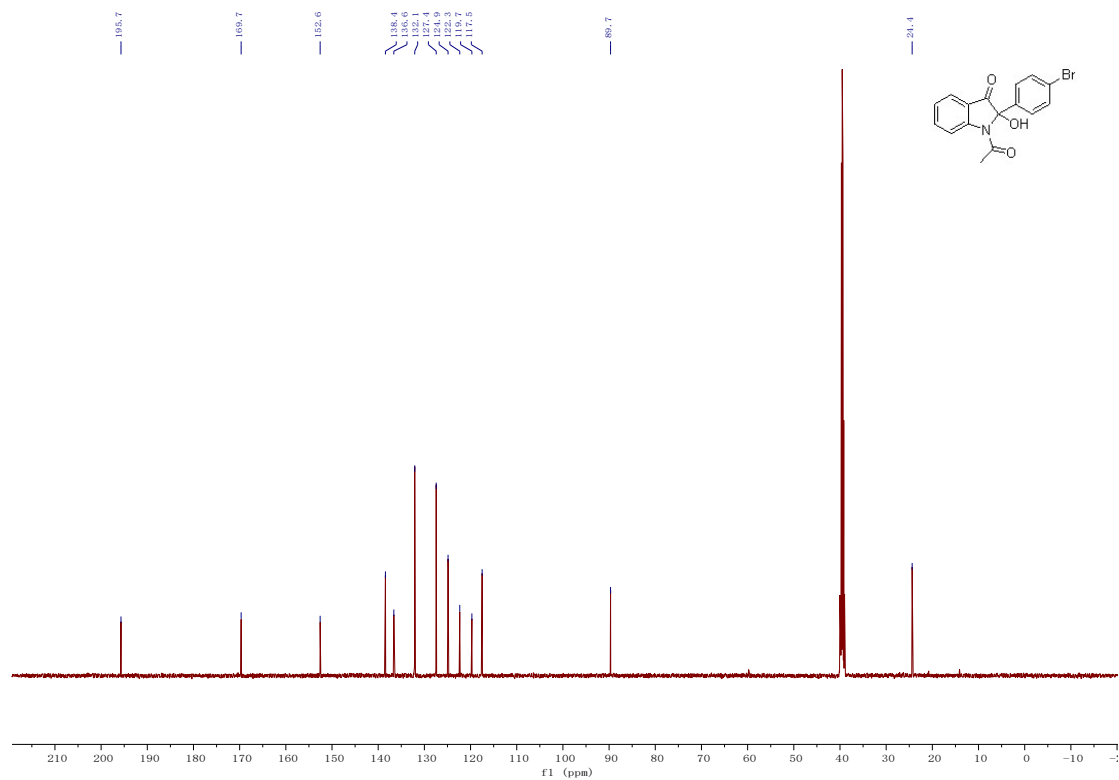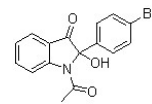

# 1-acetyl-2-(2-aminophenyl)-2-hydroxyindolin-3-one (2d)

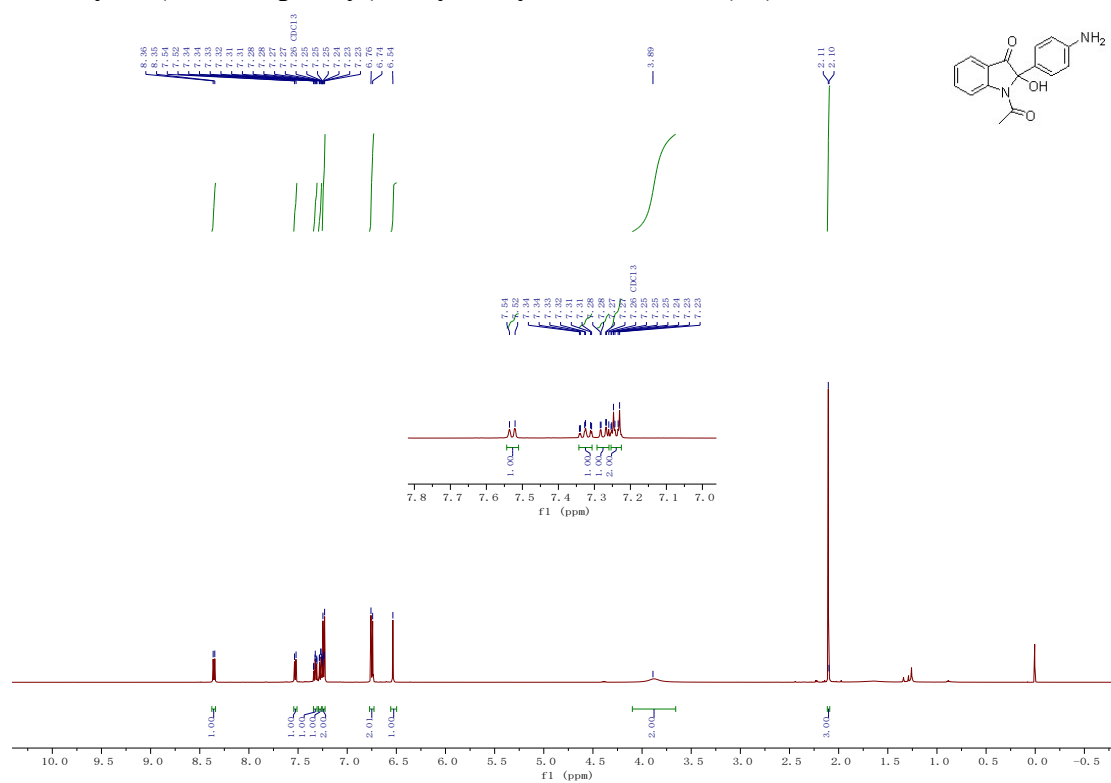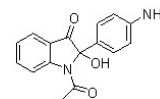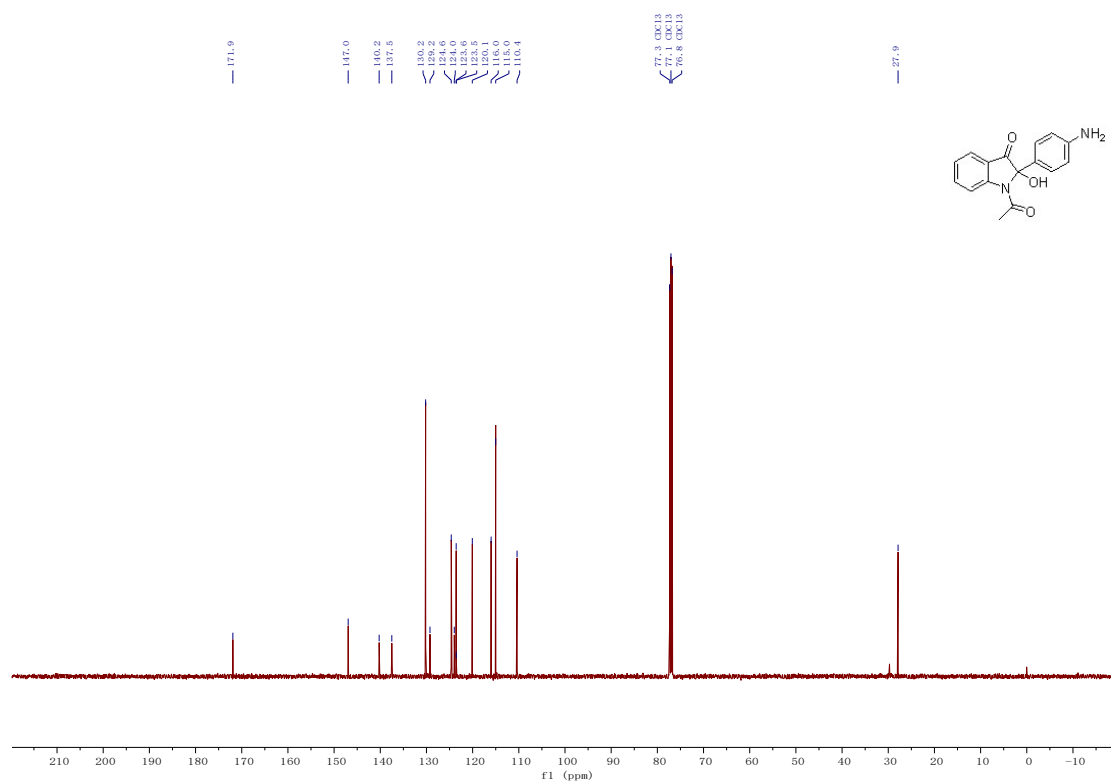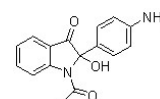

# 4-(1-acetyl-2-hydroxy-3-oxindolin-2-yl)benzaldehyde (2e)

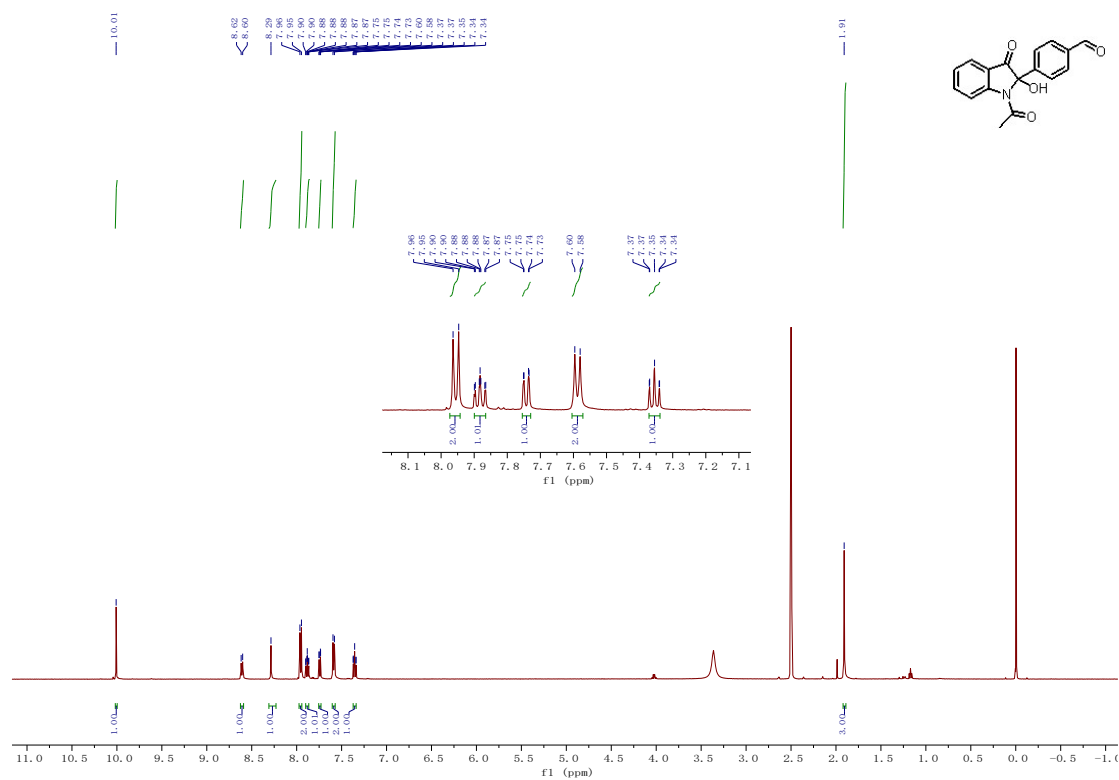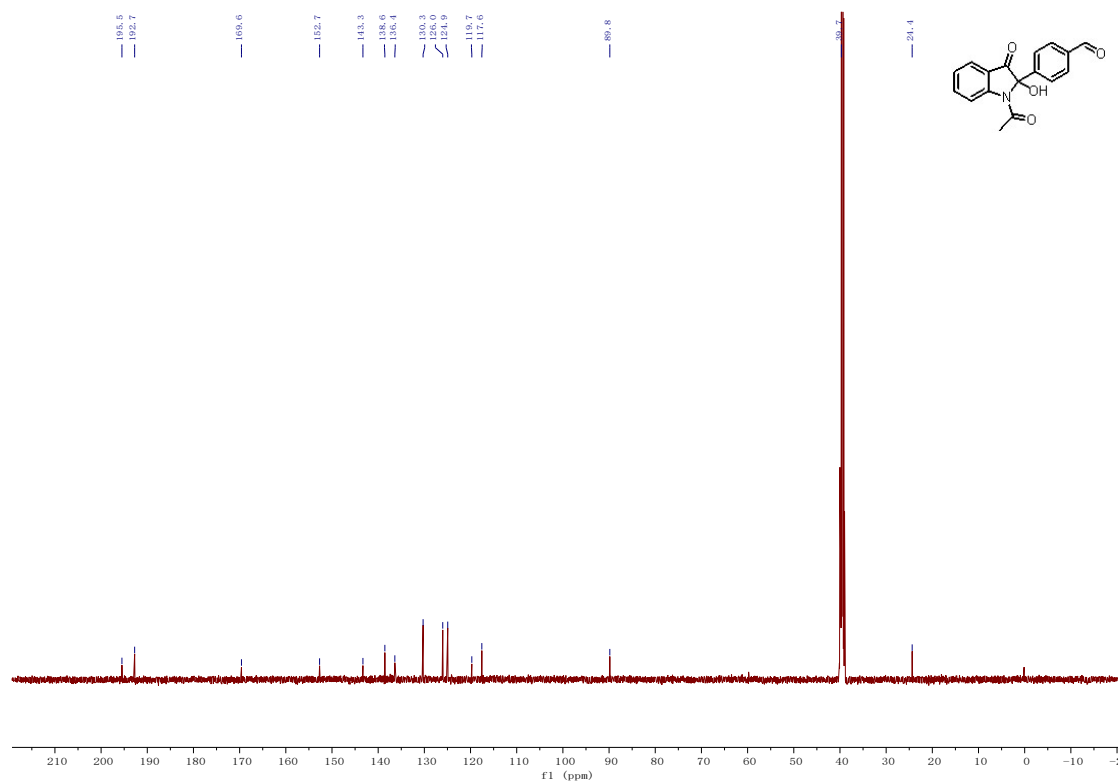

# 1-acetyl-2-hydroxy-2-(m-tolyl)indolin-3-one (2f)

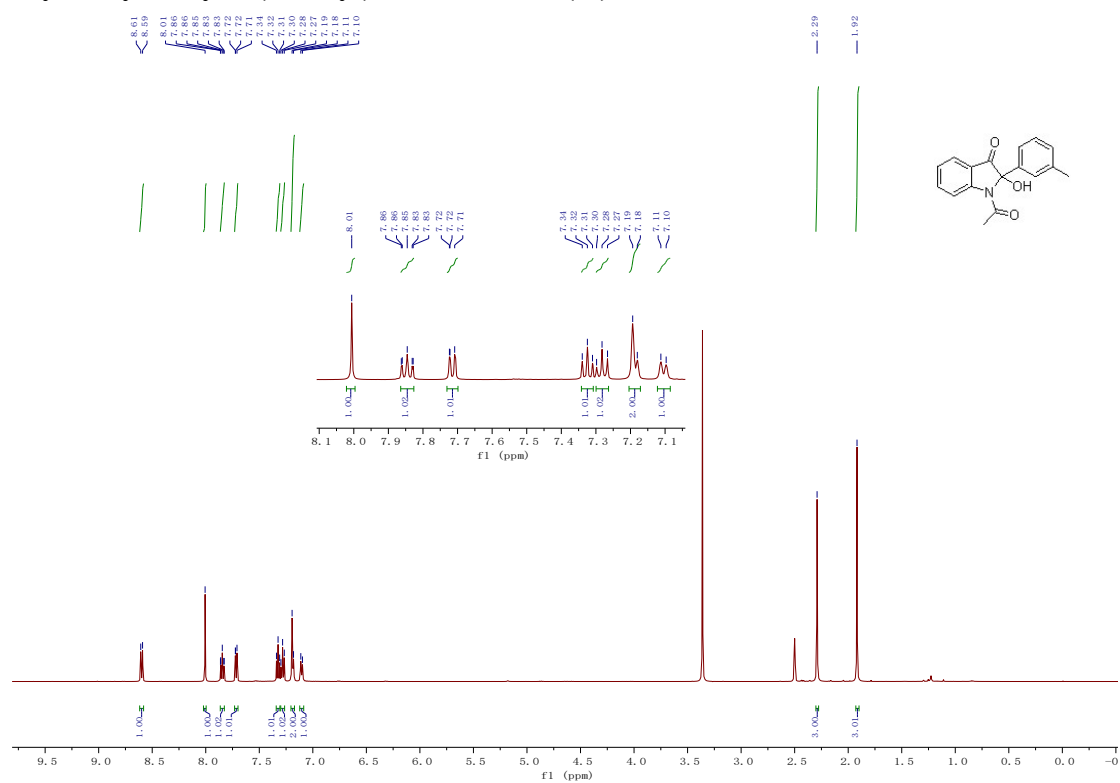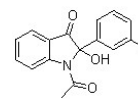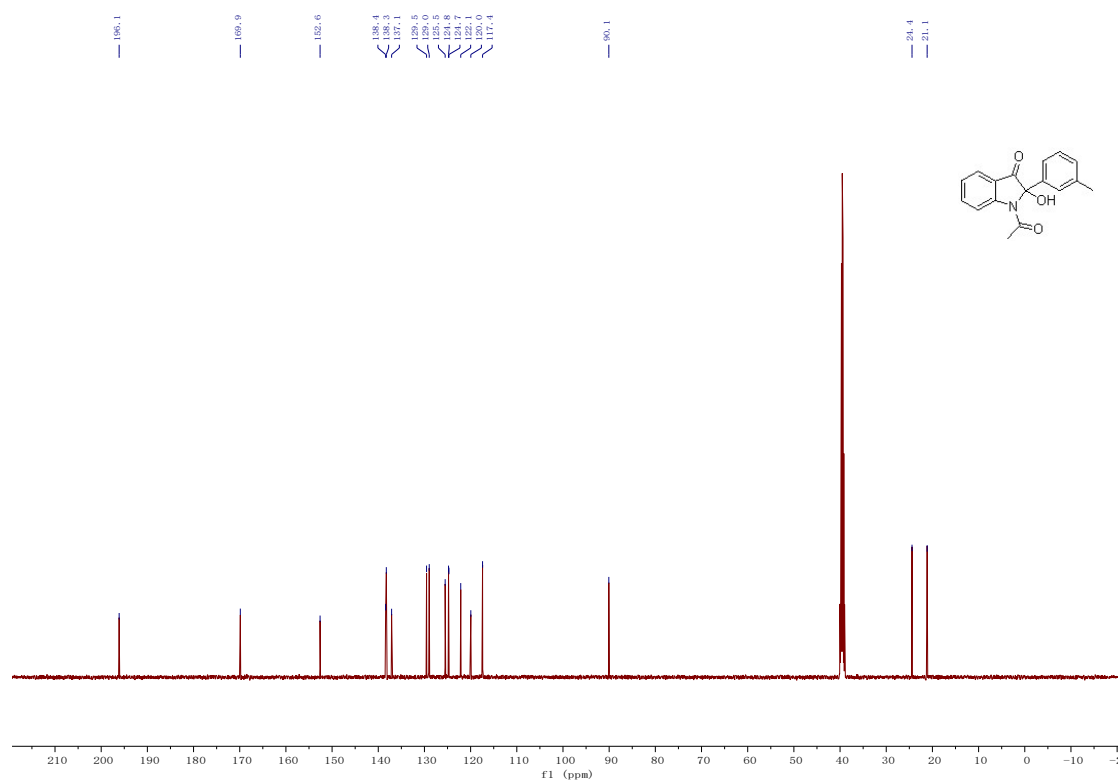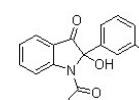

# 1-acetyl-2-hydroxy-2-(3-methoxyphenyl)indolin-3-one (2g)

pdata/1

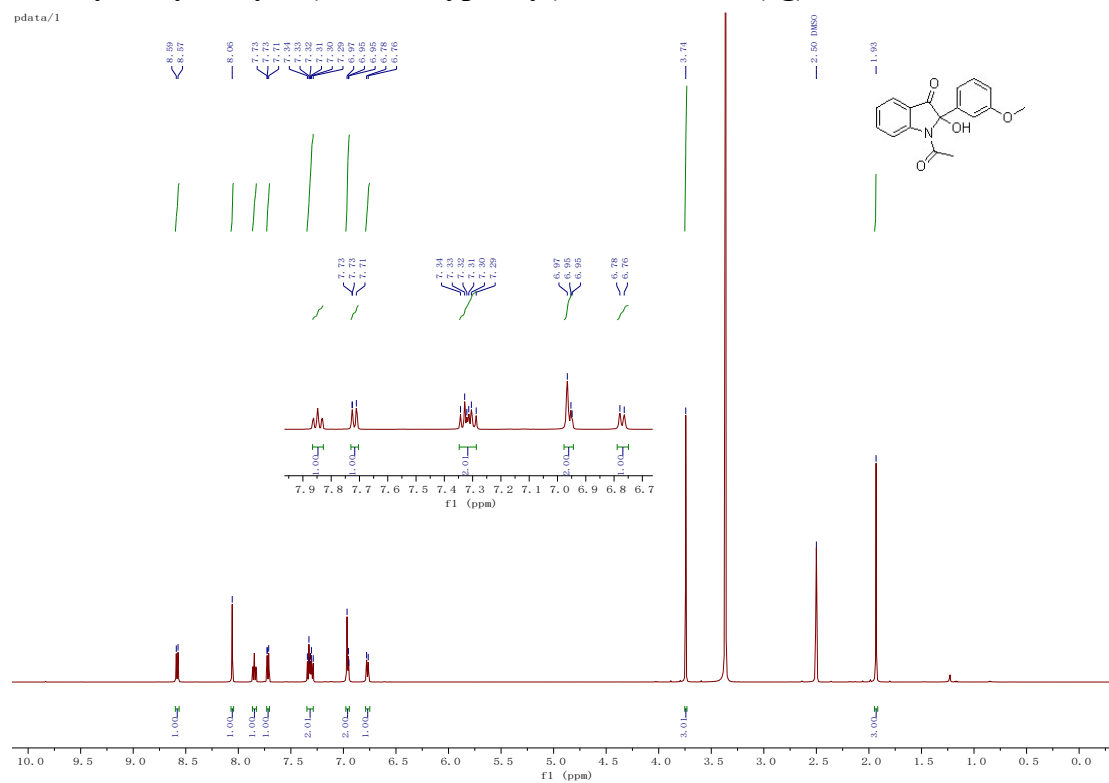

pdata/1

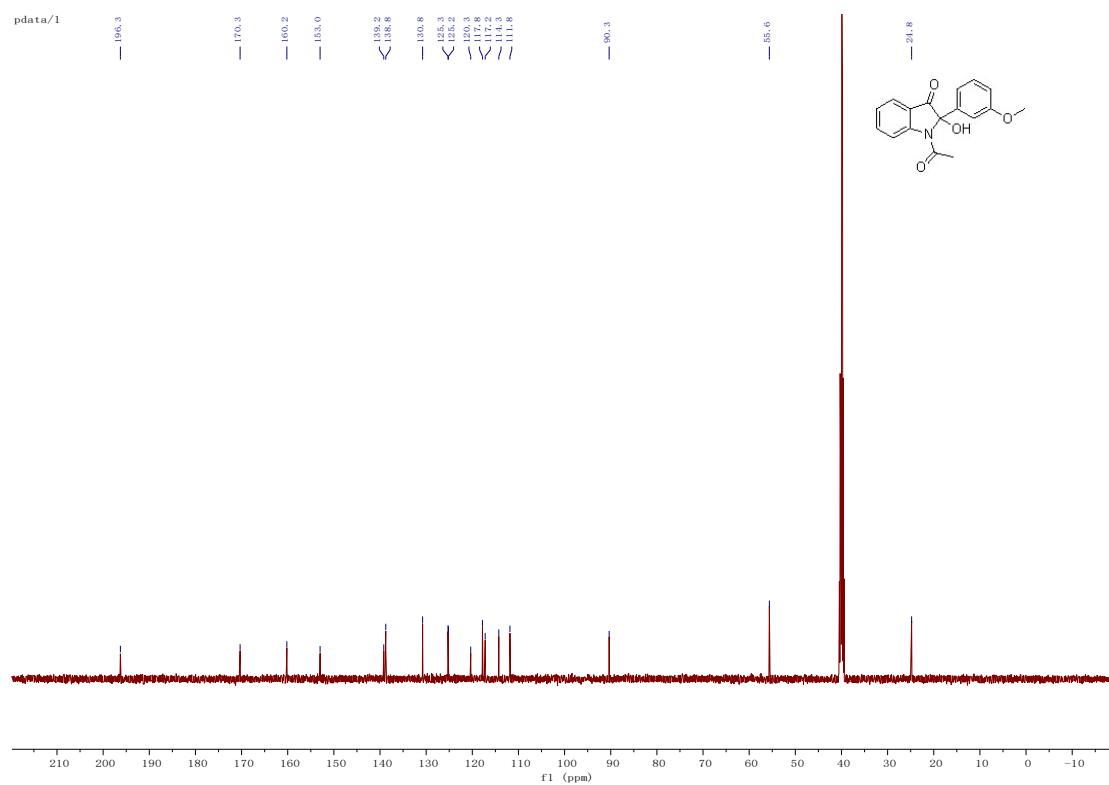







# 1-acetyl-2-hydroxy-6-methyl-2-(p-tolyl)indolin-3-one (2k)

pdata/1

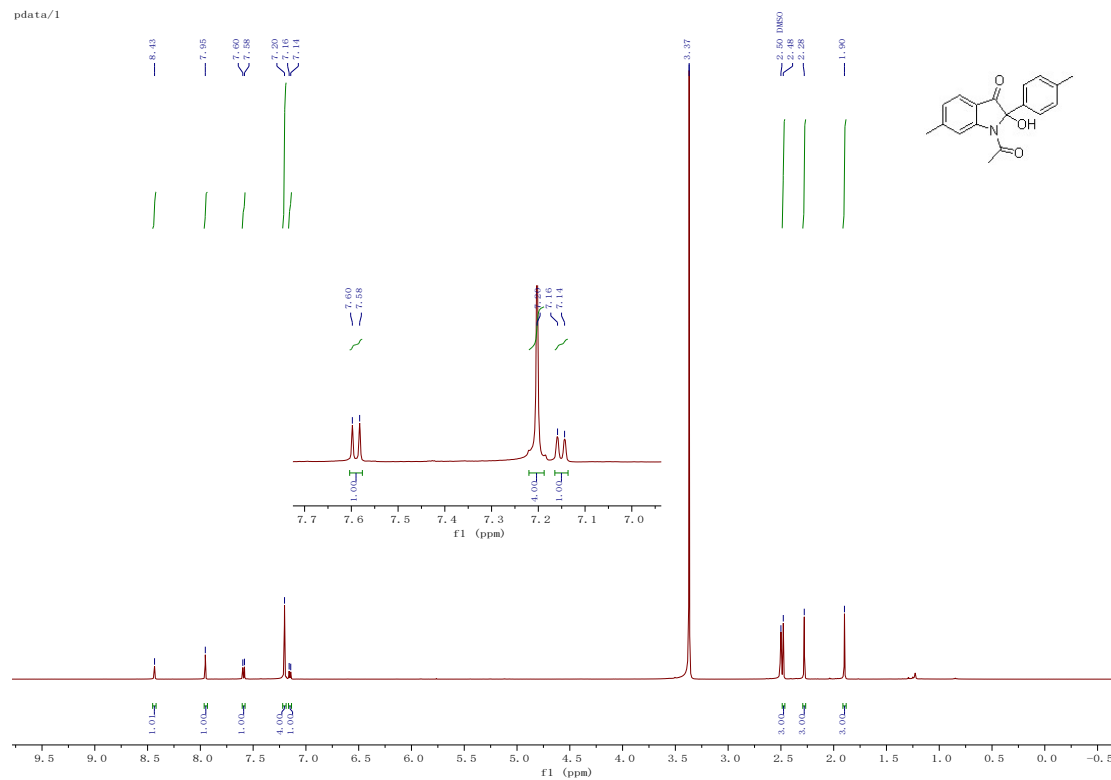

pdata/1

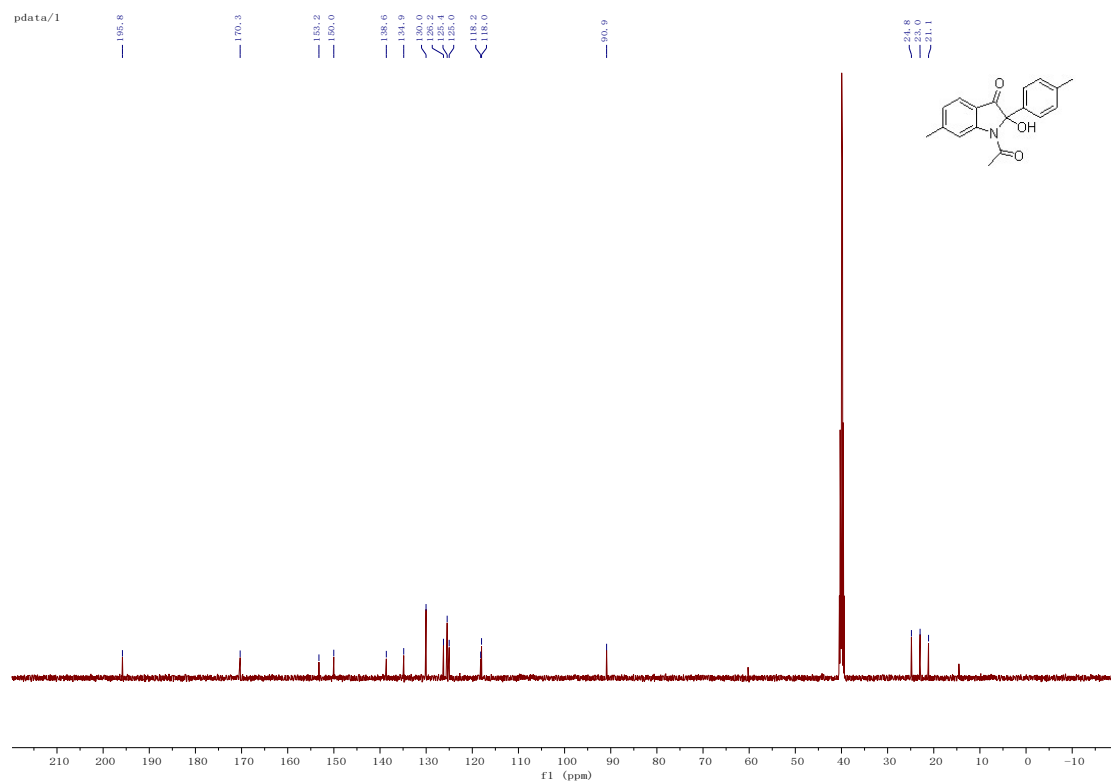

# 1-acetyl-6-fluoro-2-hydroxy-2-(p-tolyl)indolin-3-one (21)

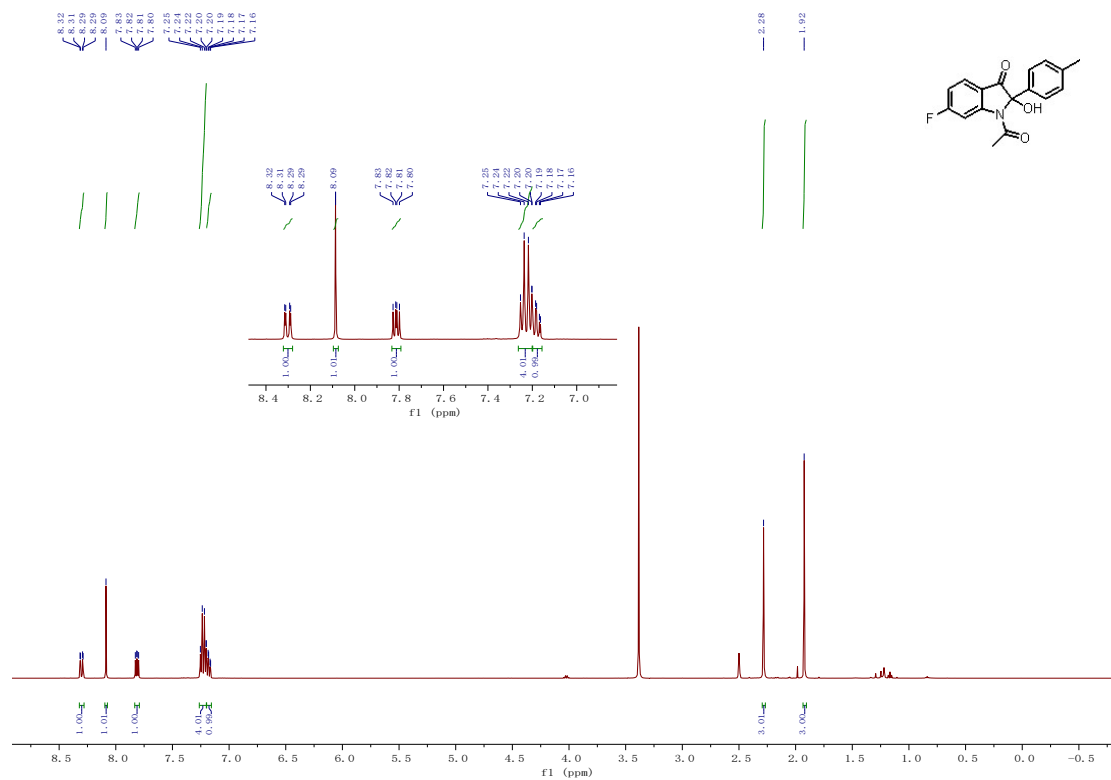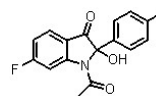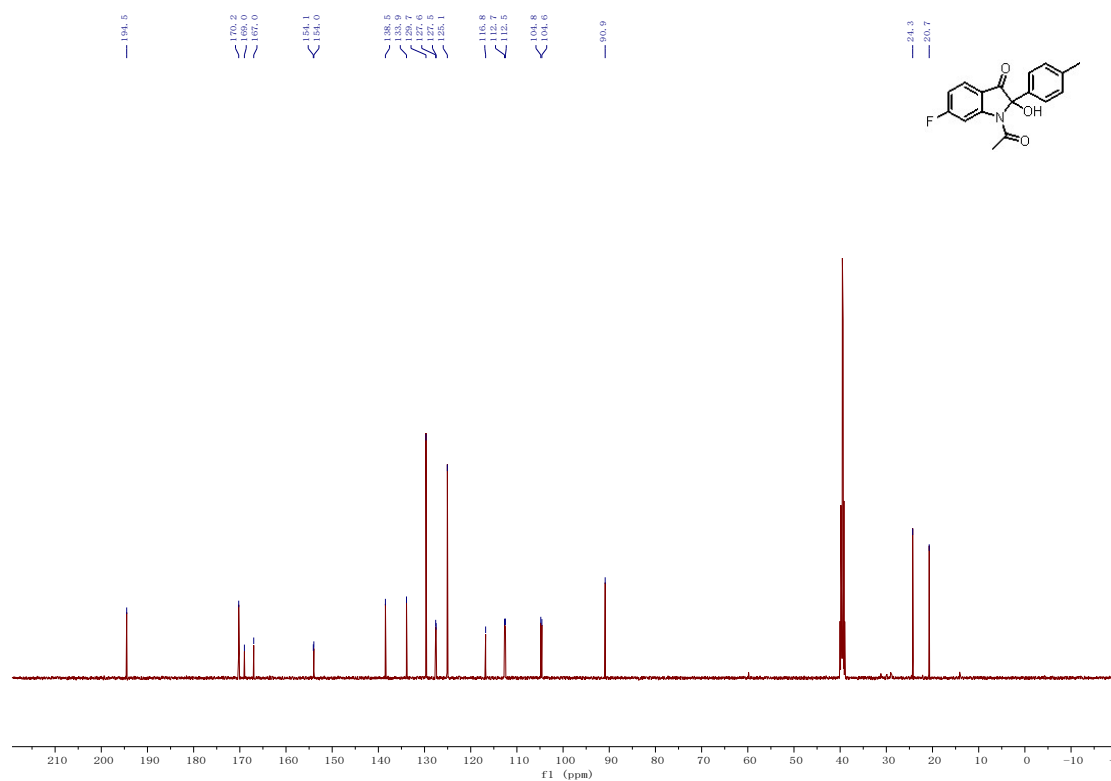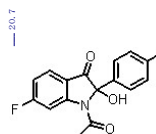

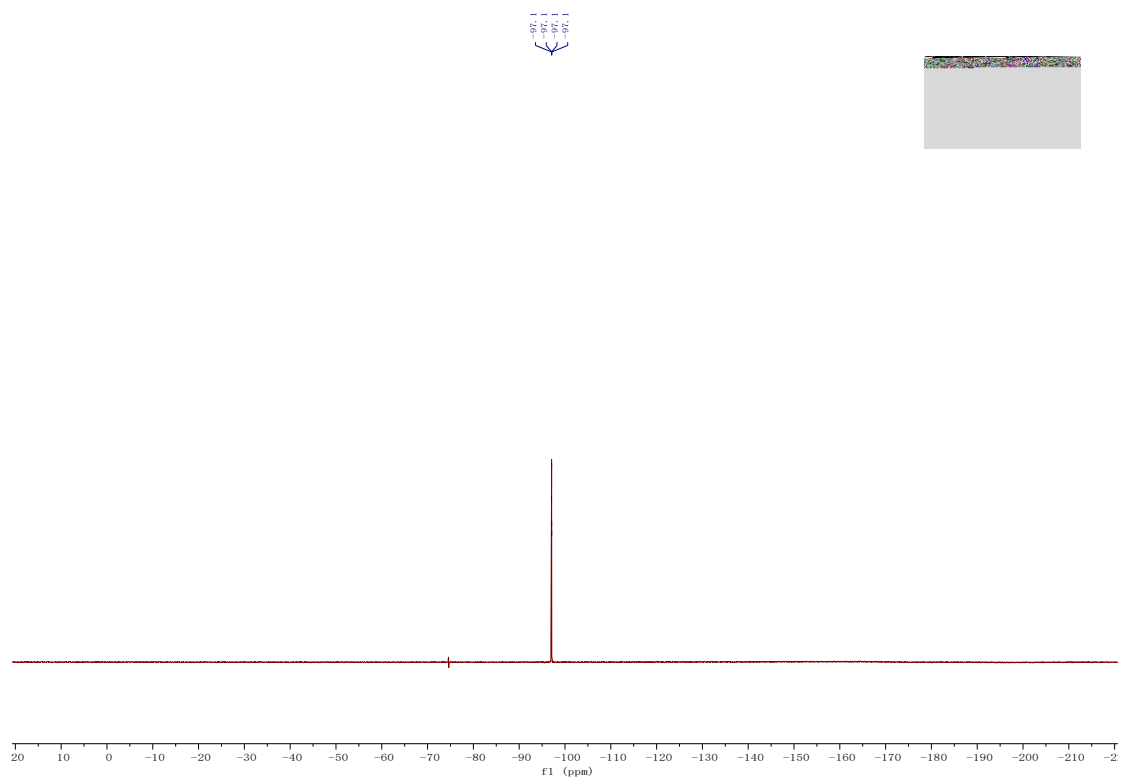

# 1-acetyl-2-hydroxy-5-methyl-2-(p-tolyl)indolin-3-one (2m)

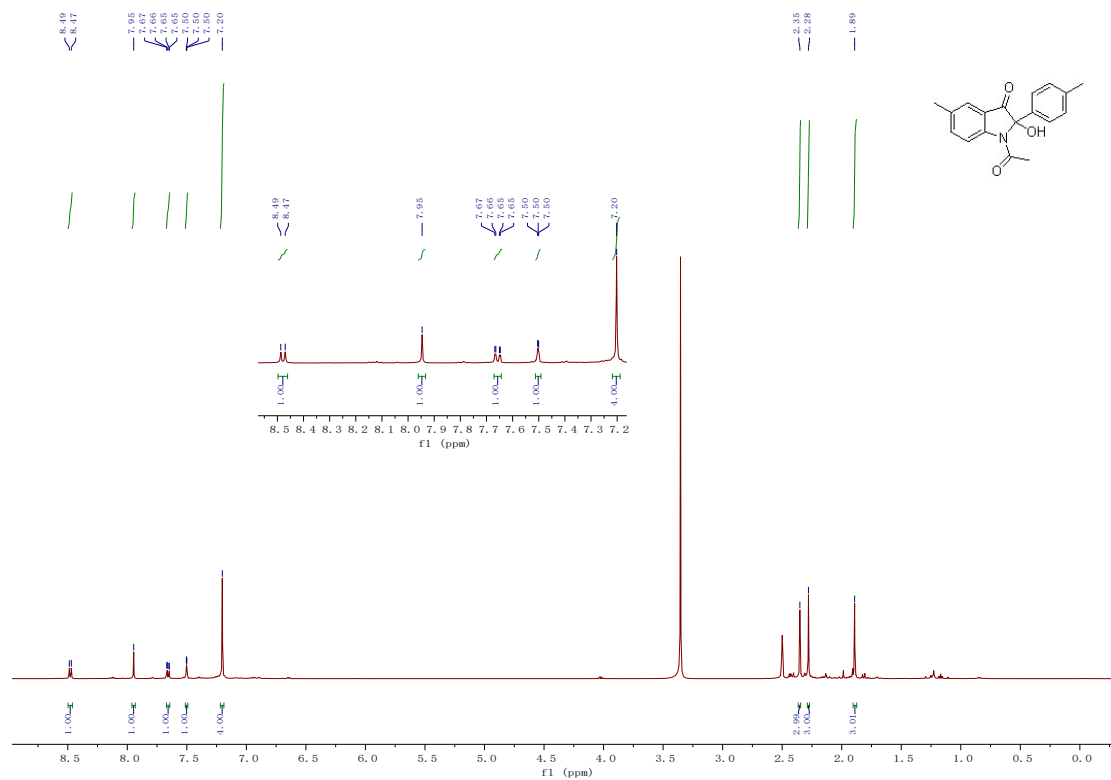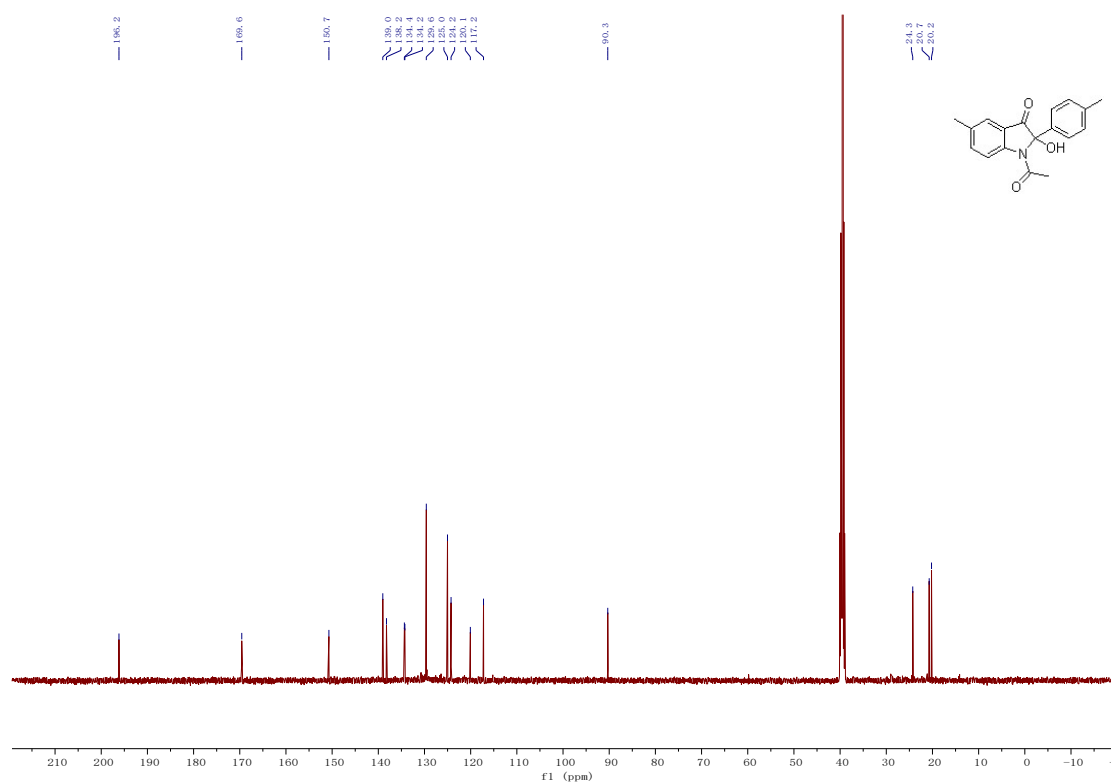

# 1-acetyl-5-bromo-2-hydroxy-2-(p-tolyl)indolin-3-one (2n)

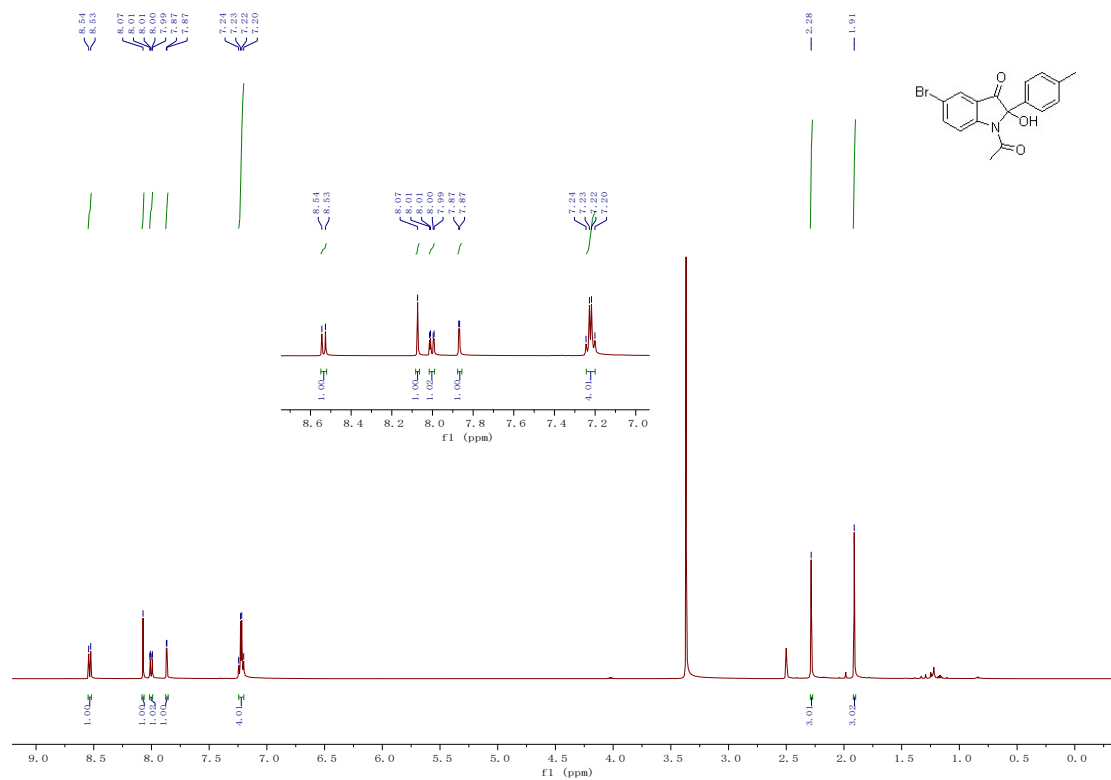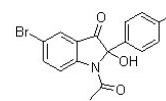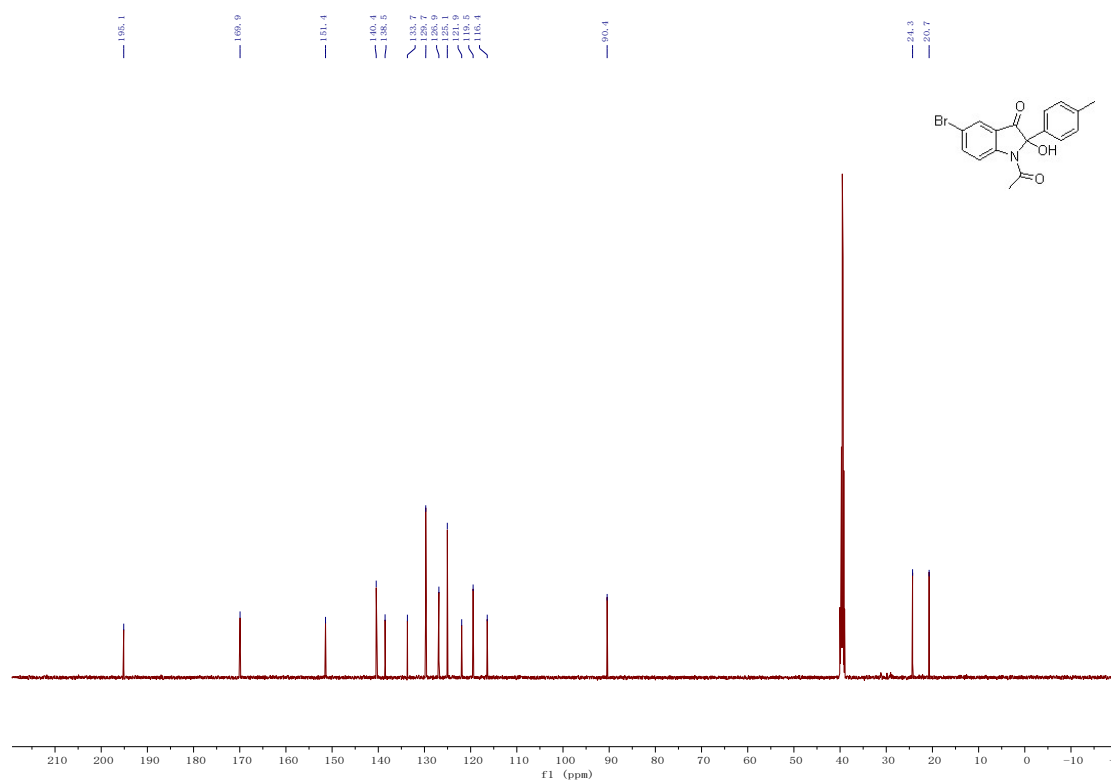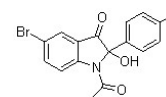

# 1-acetyl-5-fluoro-2-hydroxy-2-(p-tolyl)indolin-3-one (2o)

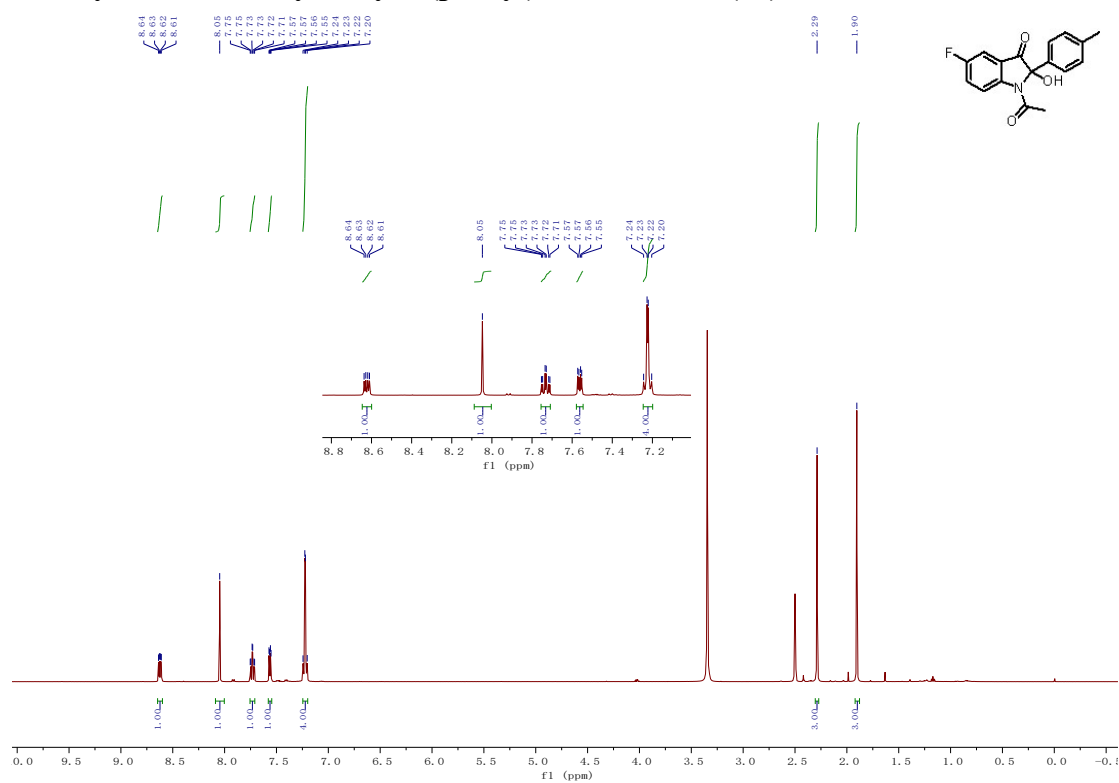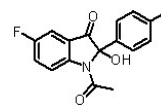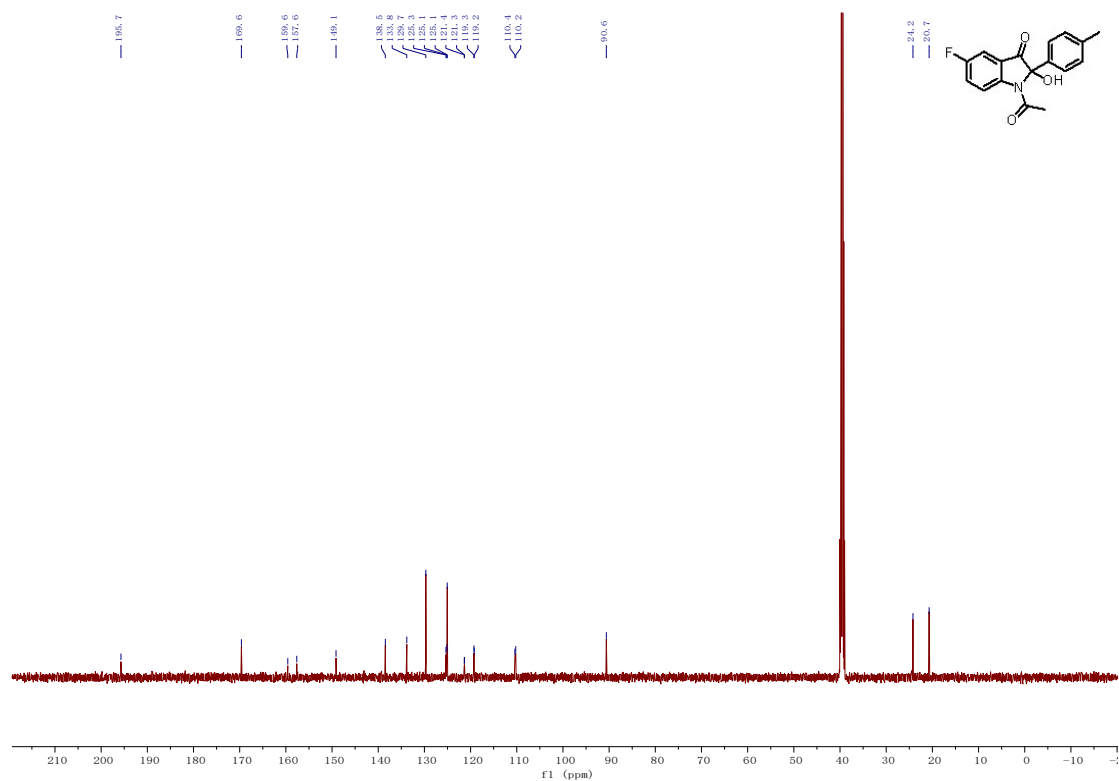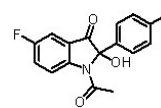

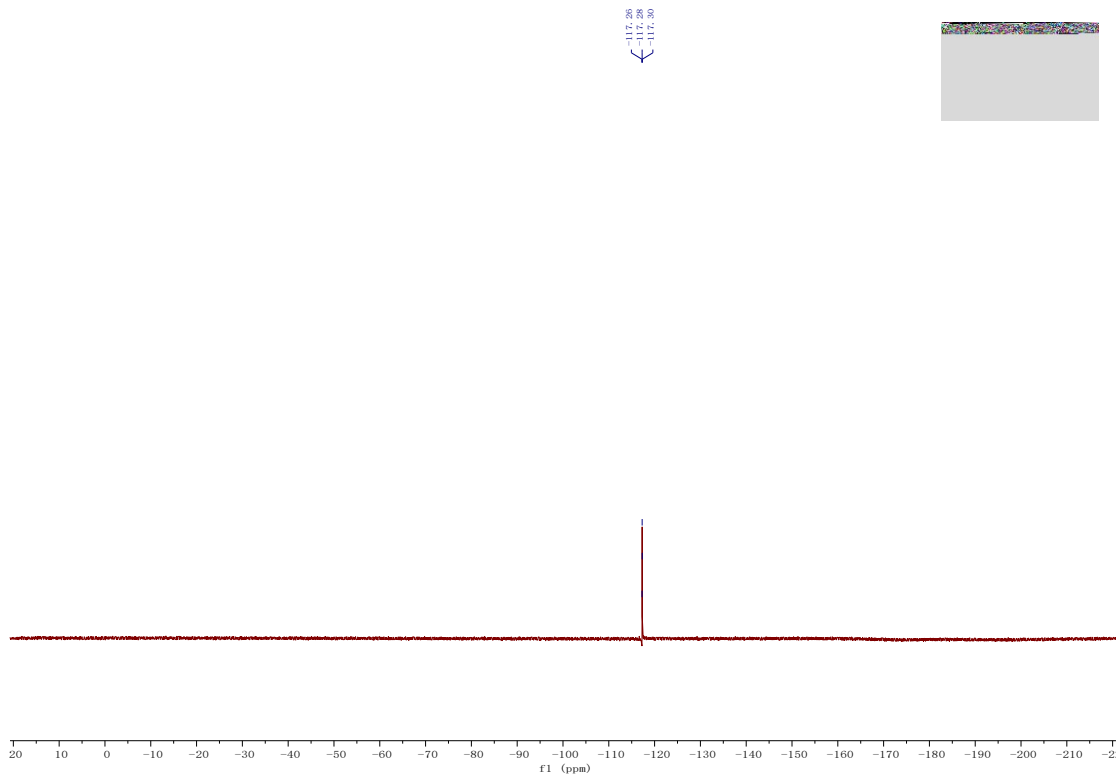

**1-acetyl-2-hydroxy-2-(p-tolyl)-5-(trifluoromethyl)indolin-3-one (2p)**

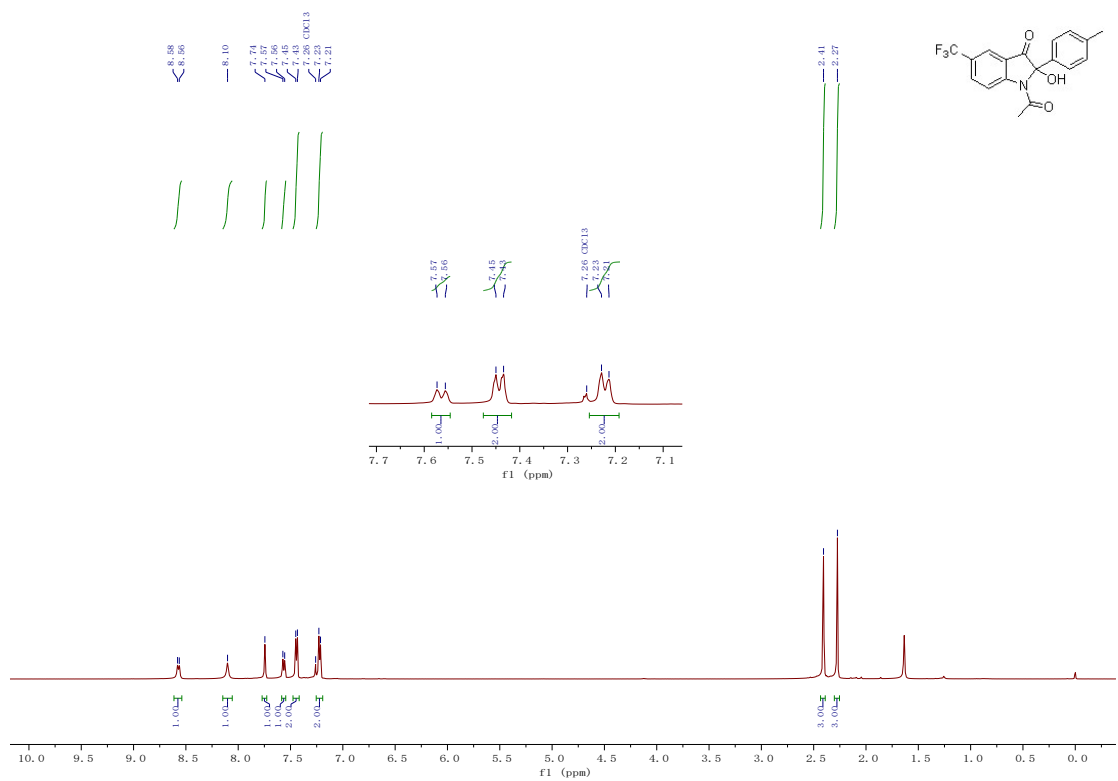



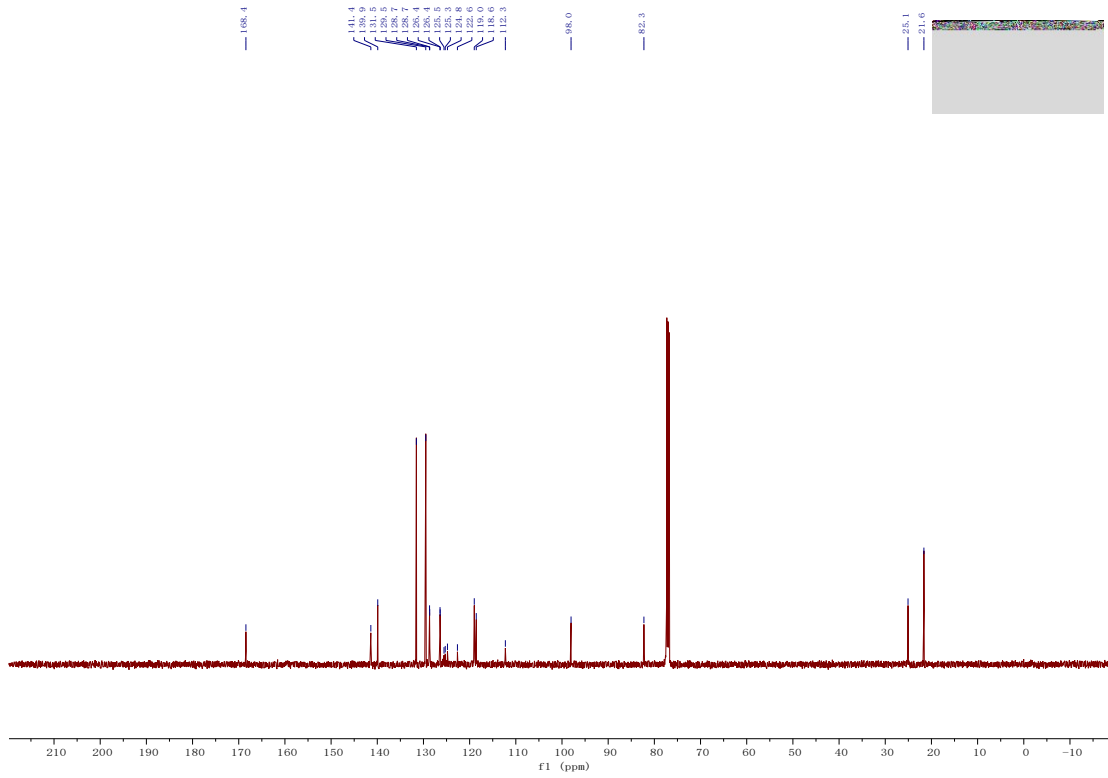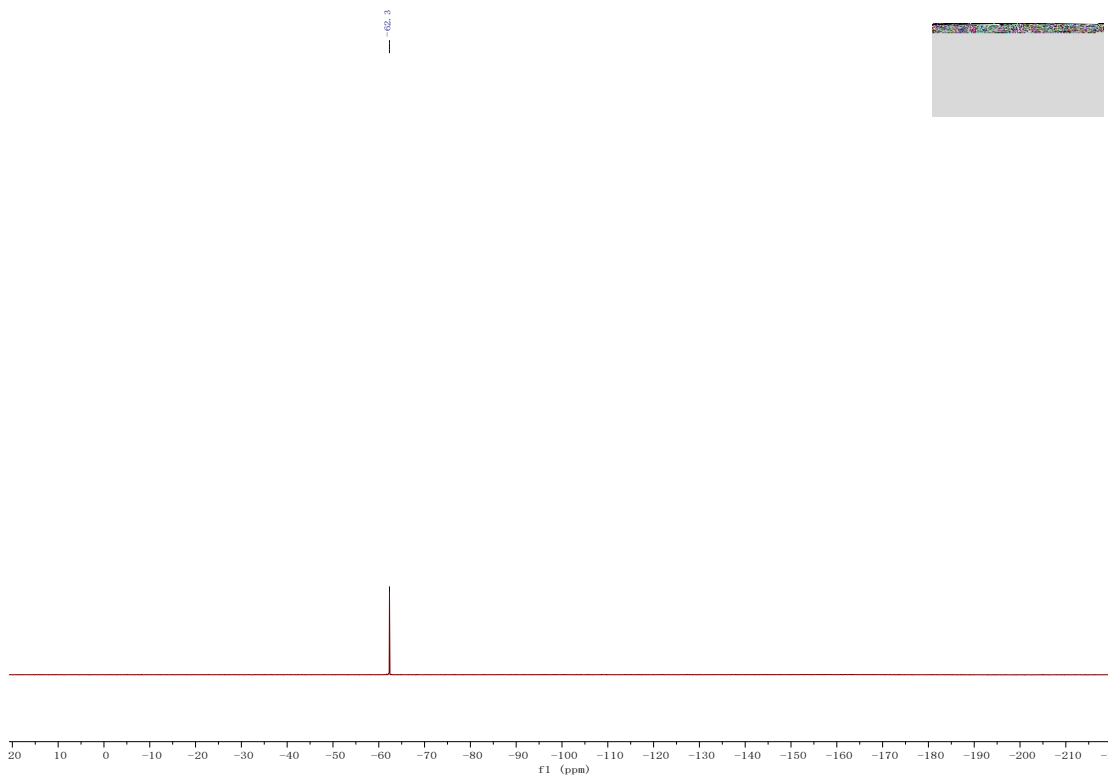

# 1-acetyl-2-hydroxy-4-methyl-2-(p-tolyl)indolin-3-one (2q)

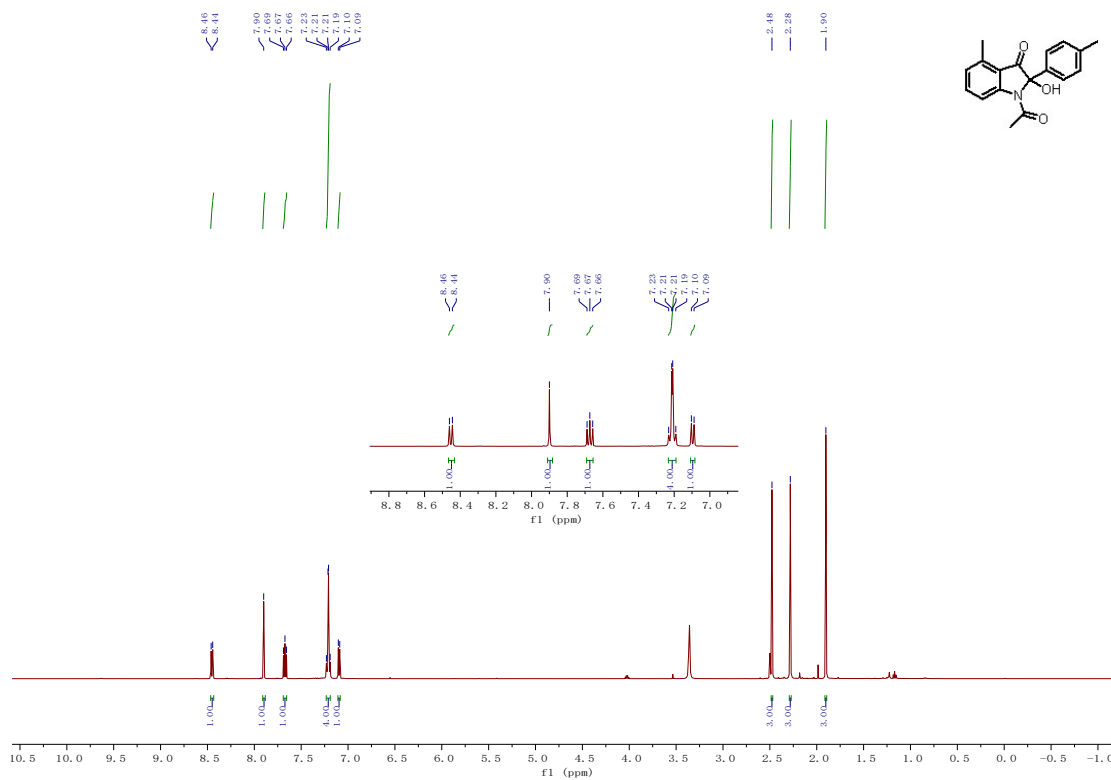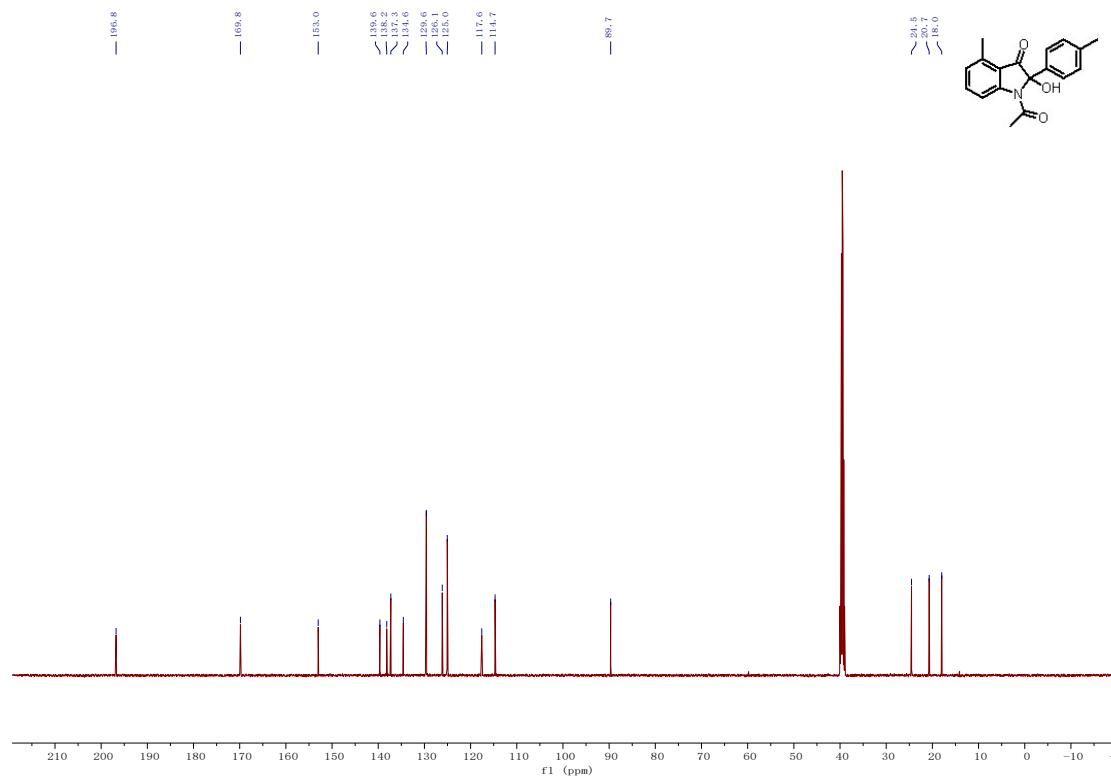

# 1-acetyl-2-hydroxy-2-(1H-indol-5-yl)indolin-3-one (2r)

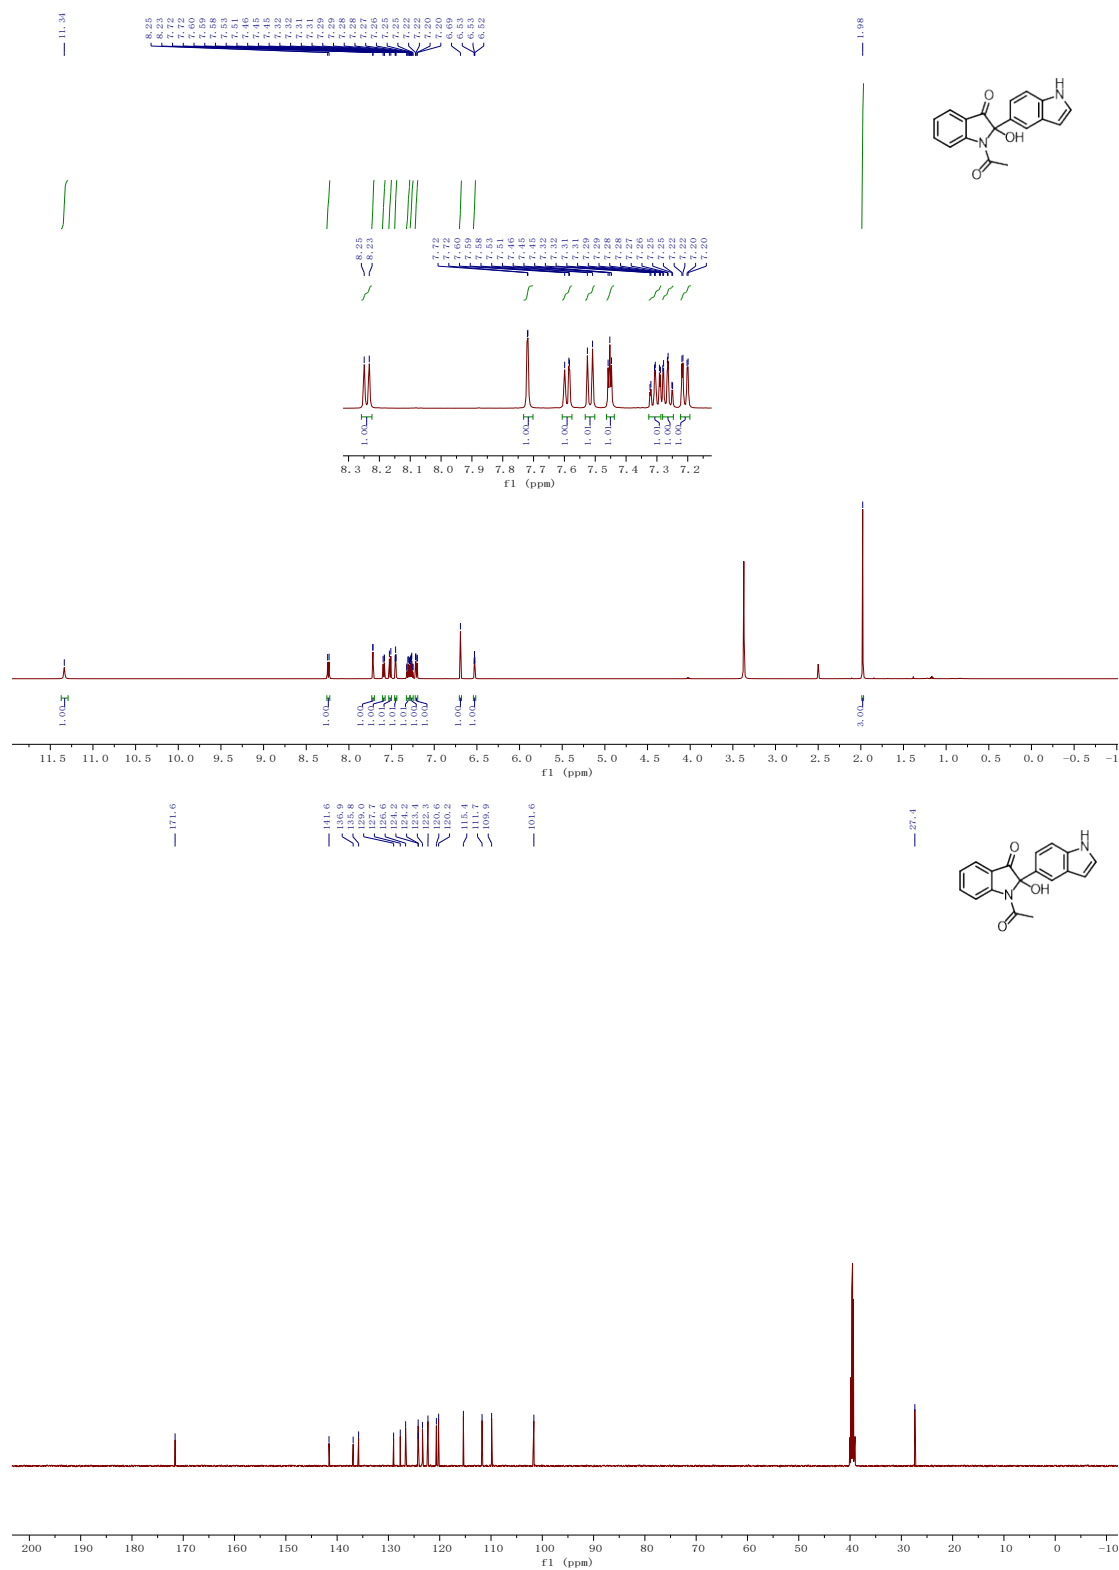

# 1-acetyl-2-hydroxy-2-(thiophen-3-yl)indolin-3-one (2s)

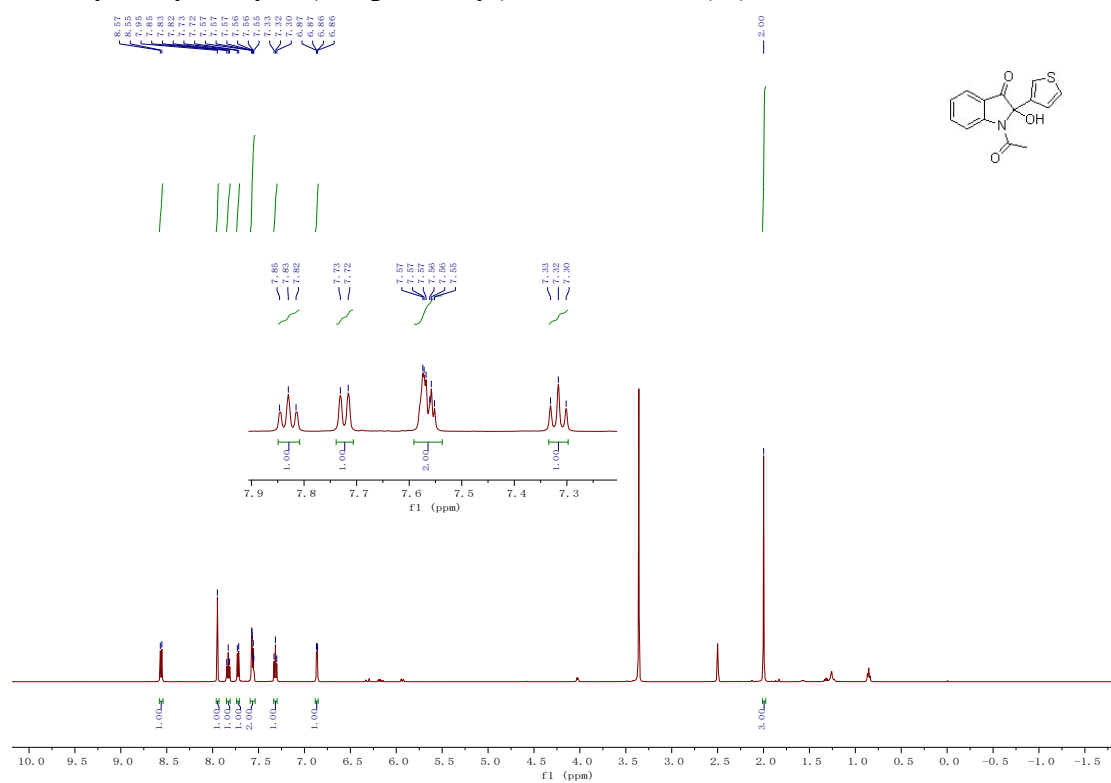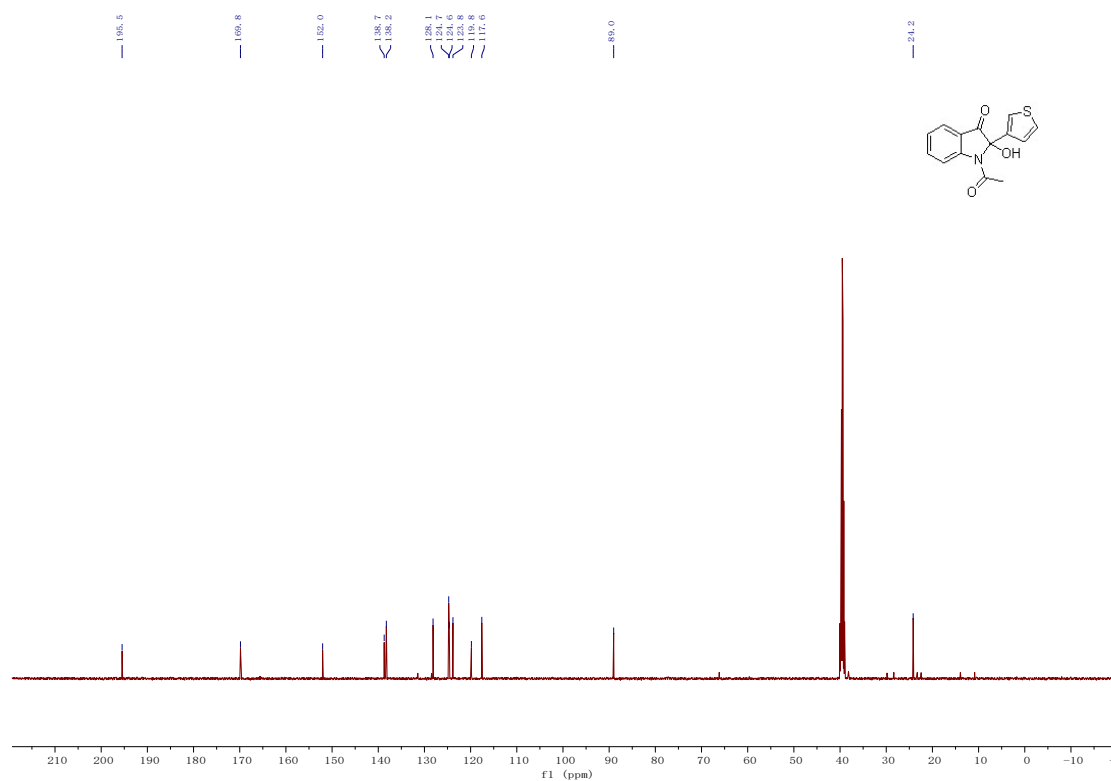

# 1-acetyl-2-(furan-2-yl)-2-hydroxyindolin-3-one (2t)

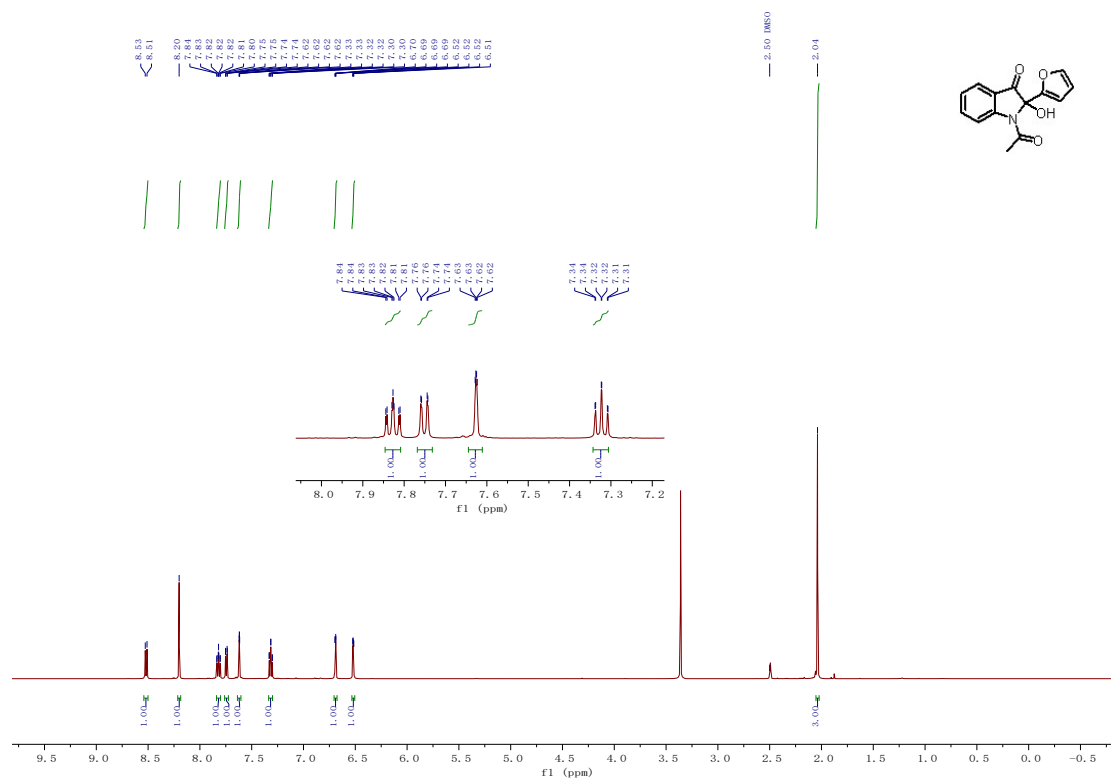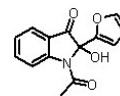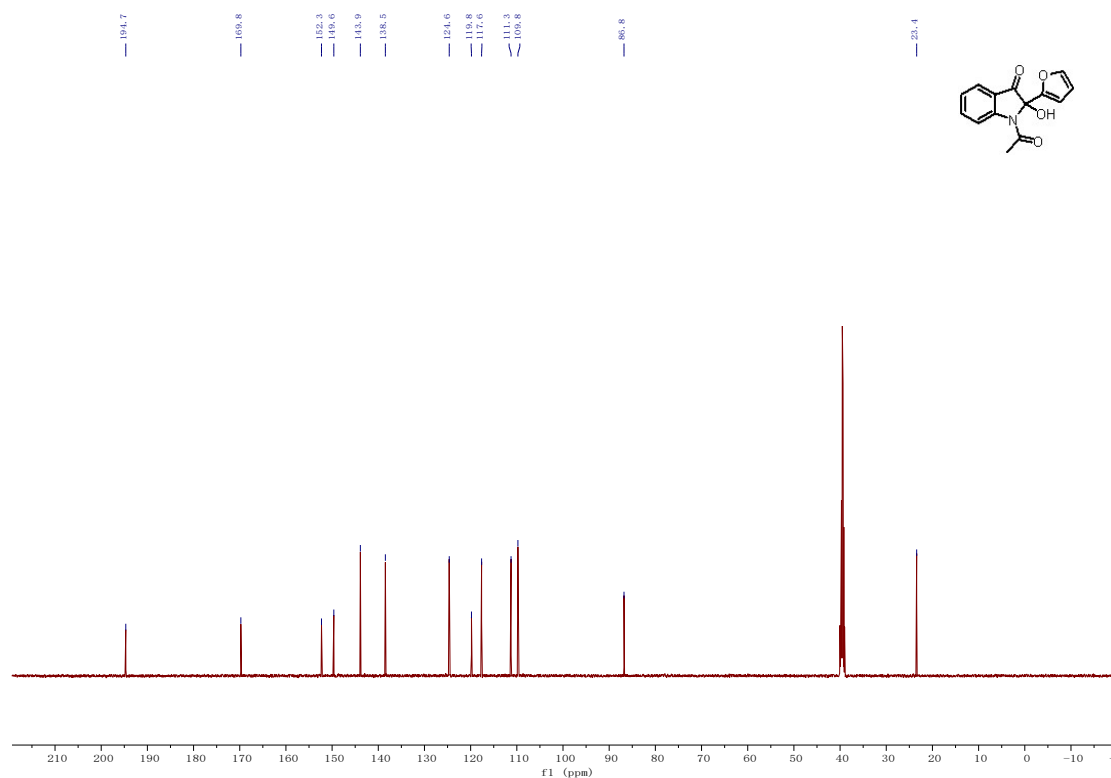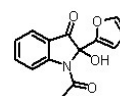

**2-hydroxy-2-(4-methoxyphenyl)-3-oxindoline-1-carbaldehyde (2u)**

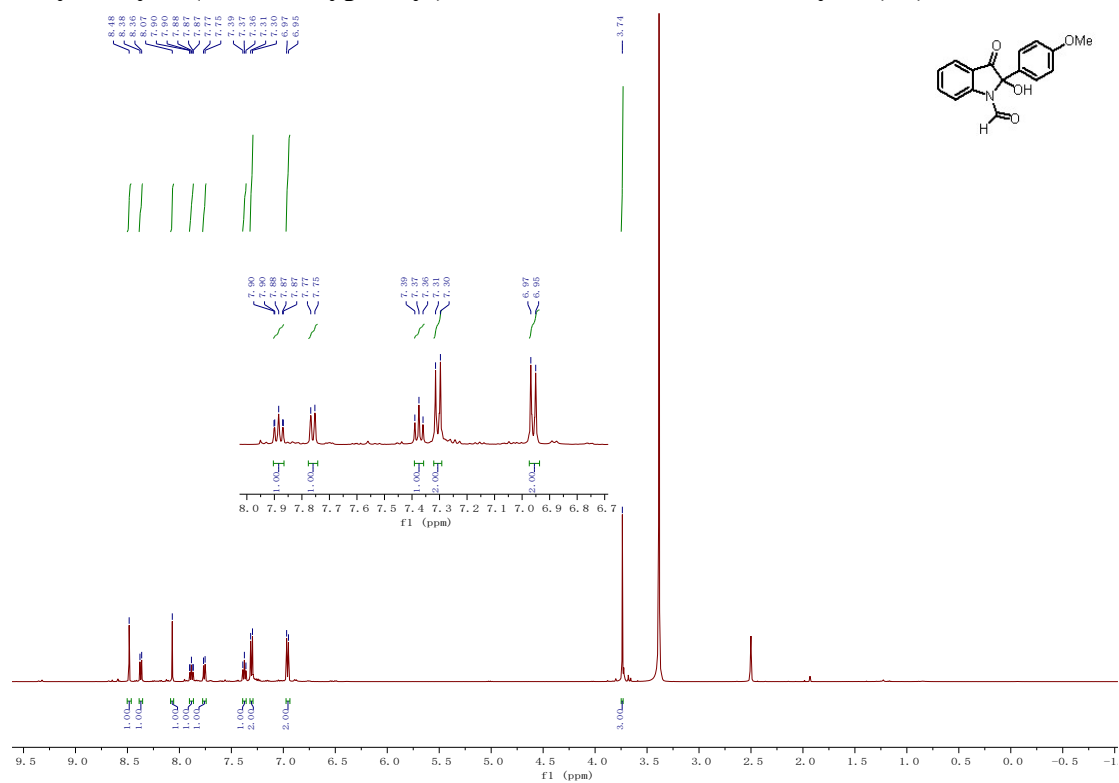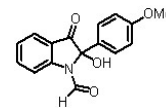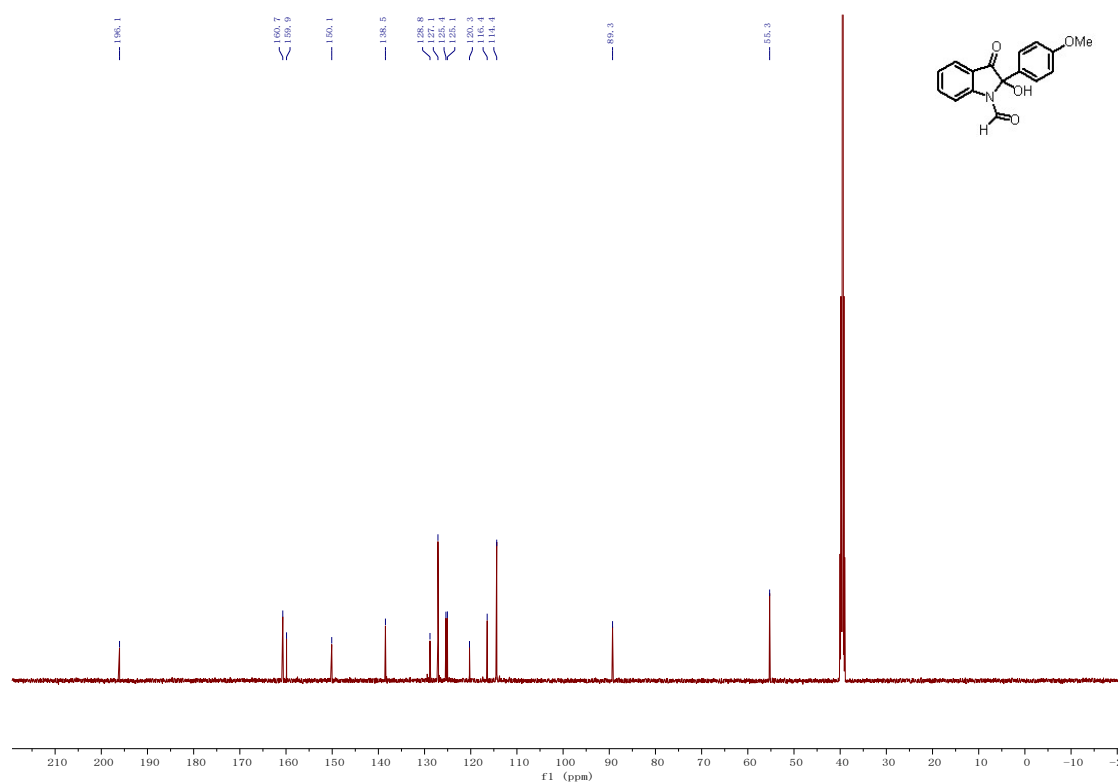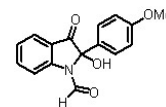

## 2-(4-bromophenyl)-2-hydroxy-3-oxoindoline-1-carbaldehyde (2v)

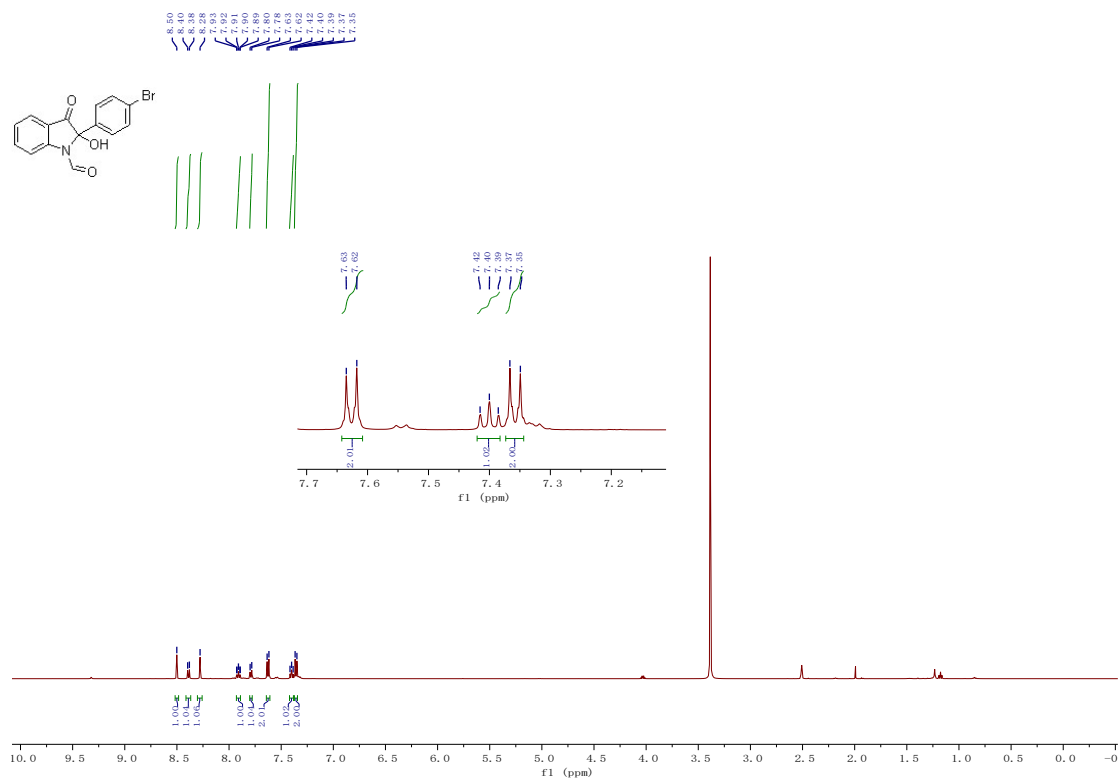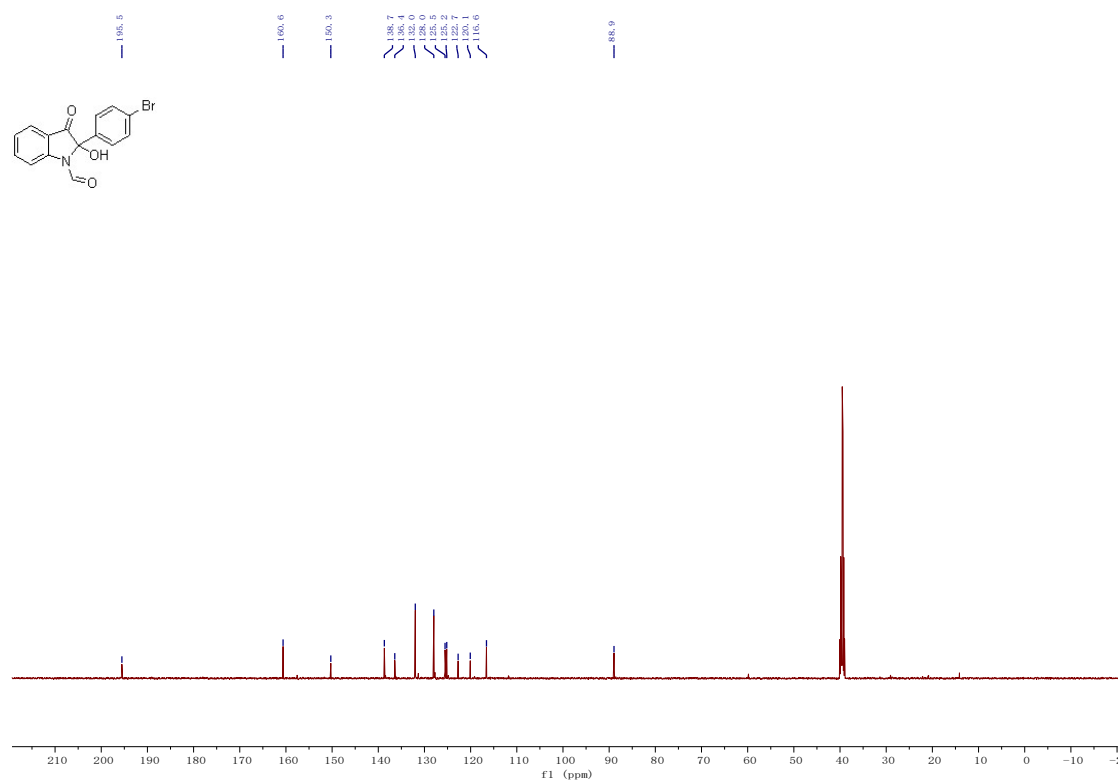

# 1-heptanoyl-2-hydroxy-2-phenylindolin-3-one(2w)

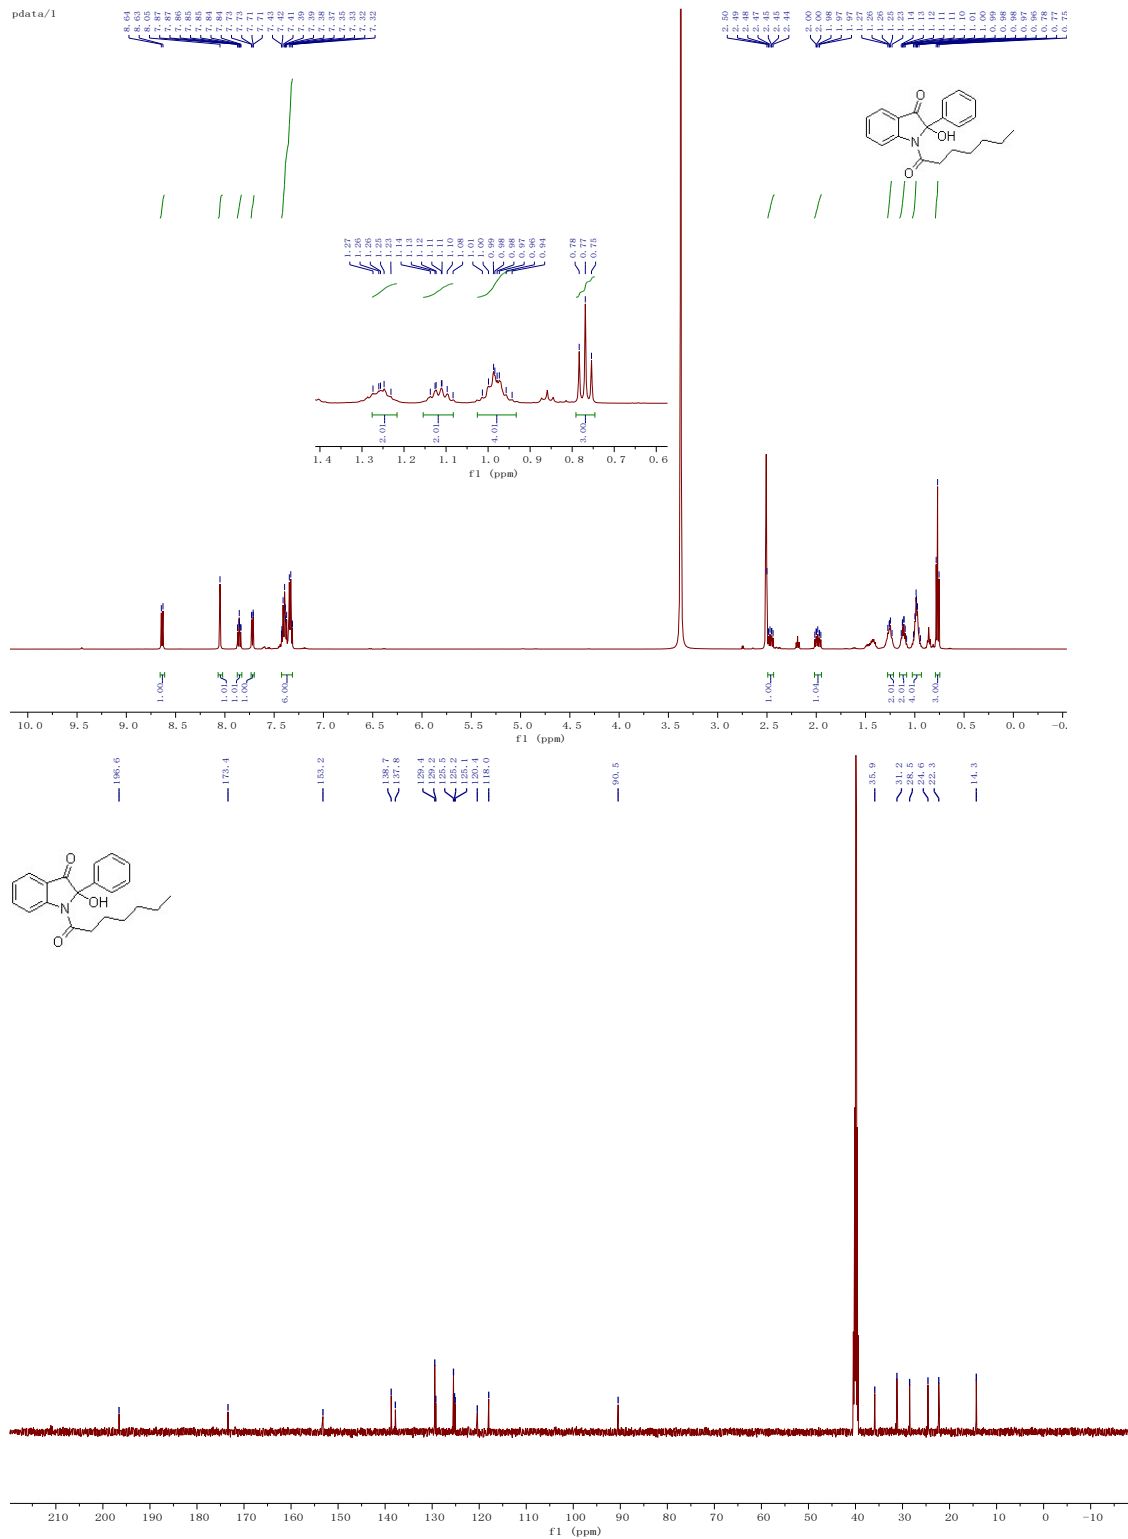





# 4-methyl-N-(2-(2-oxo-2-(p-tolyl)acetyl)phenyl)benzamid (3a)

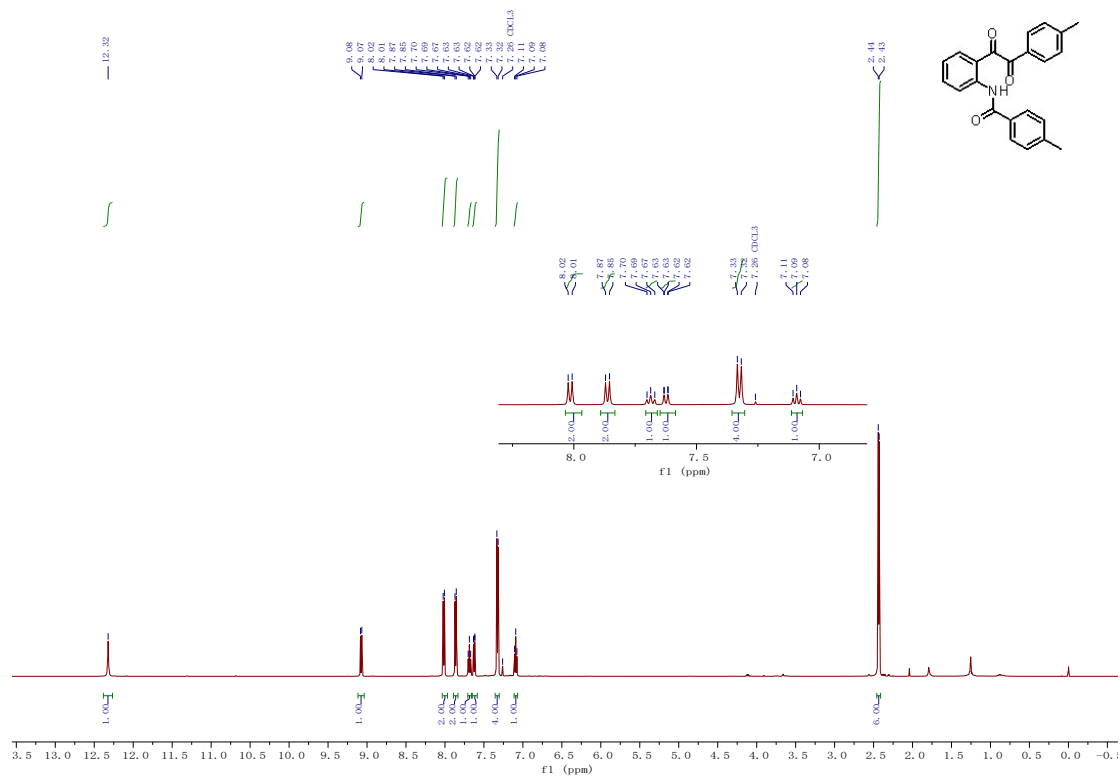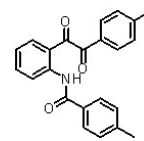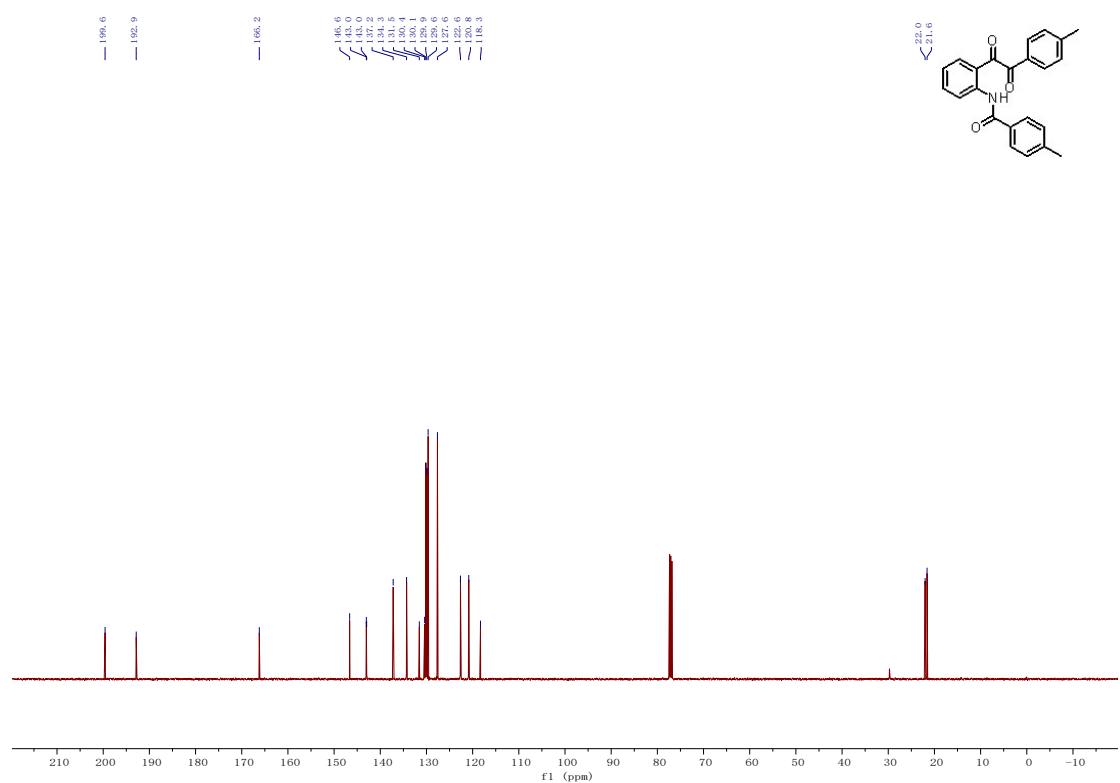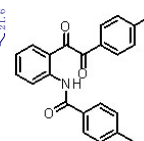

# N-(2-(2-(4-methoxyphenyl)-2-oxoacetyl)phenyl)-4-methylbenzamide (3b)

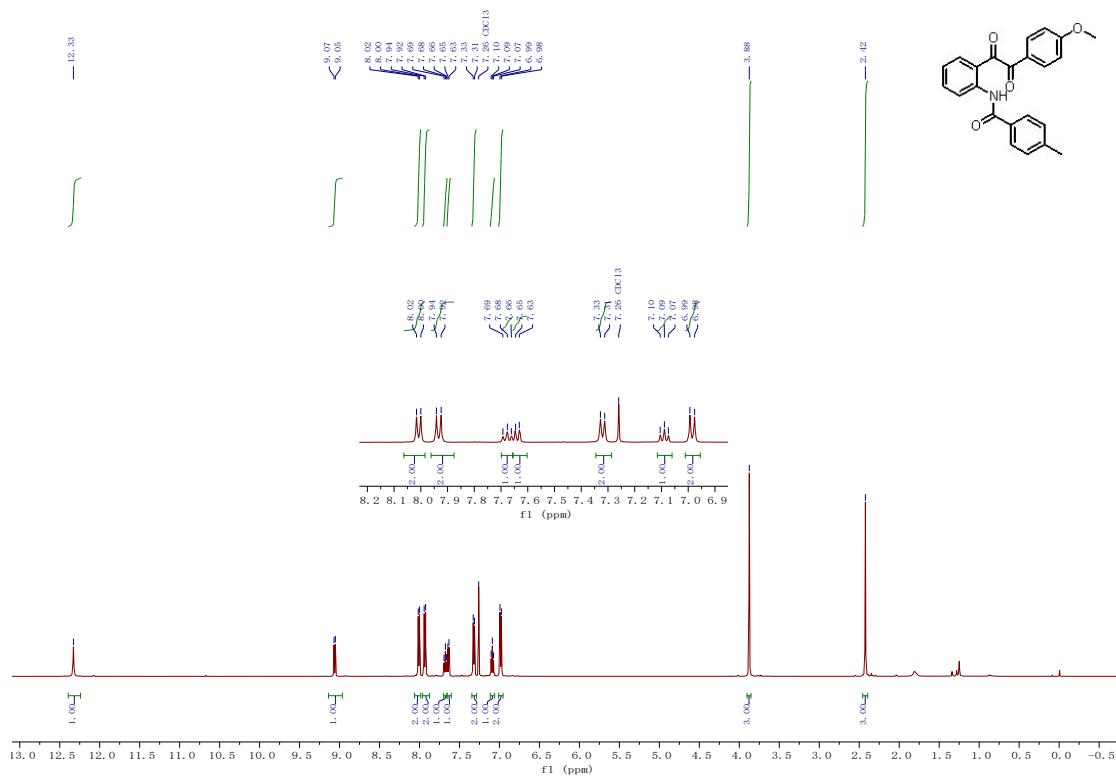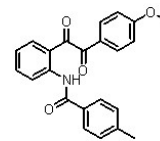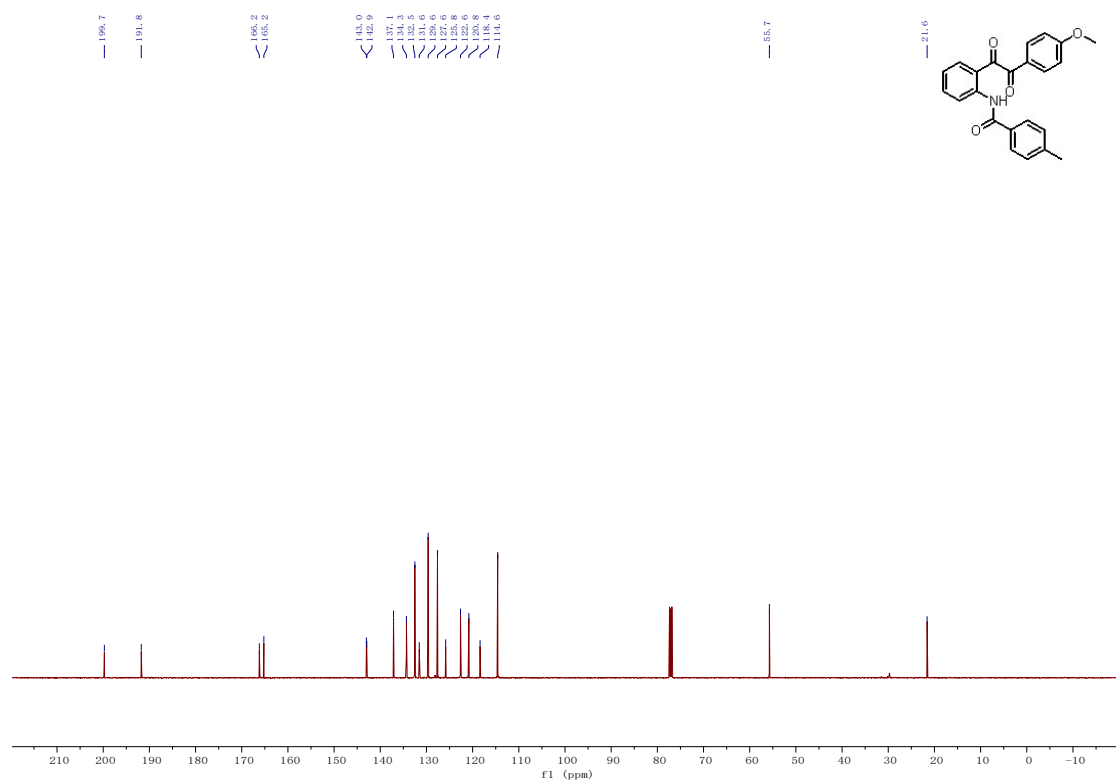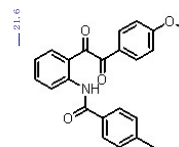

# 4-methyl-N-(2-(2-oxo-2-(m-tolyl)acetyl)phenyl)benzamide (3c)

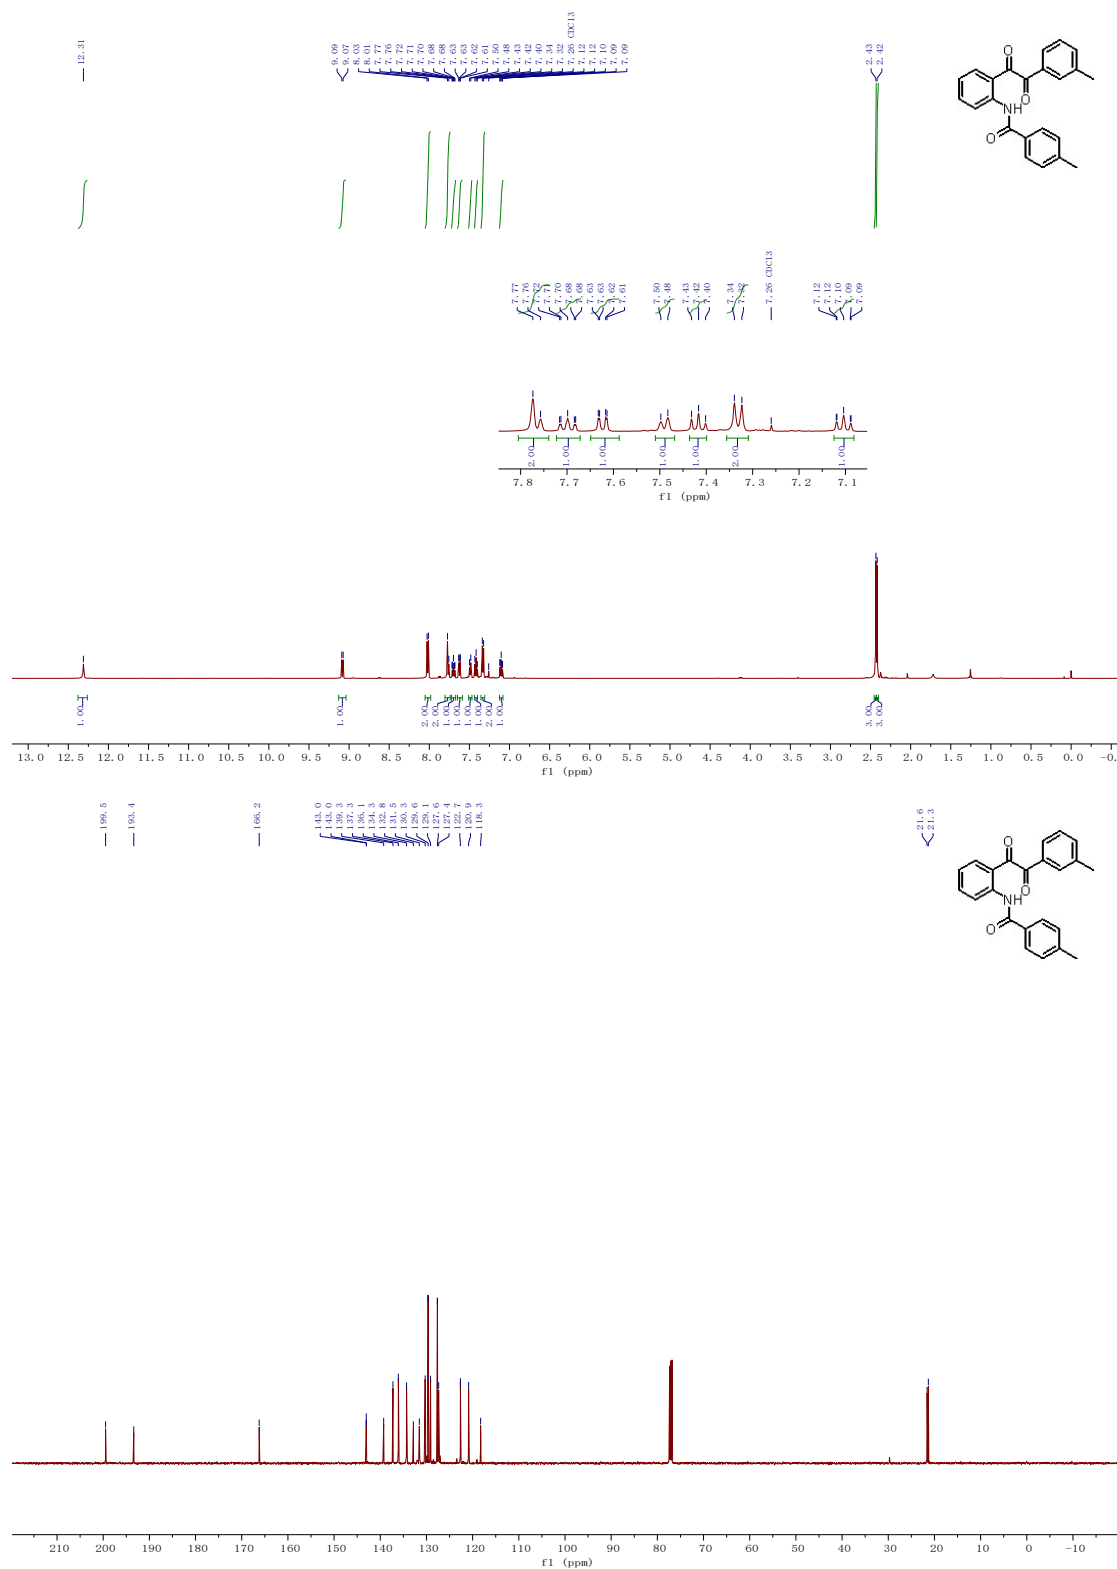



# N-(4-fluoro-2-(2-oxo-2-(p-tolyl)acetyl)phenyl)-4-methylbenzamide (3e)

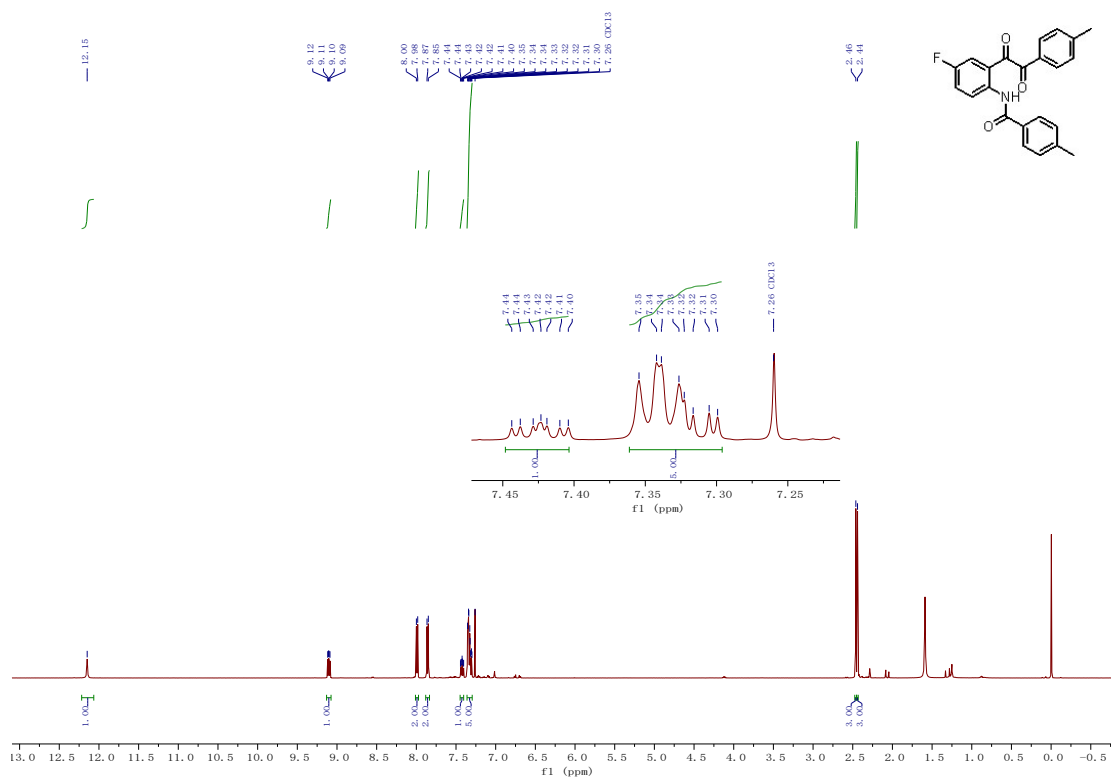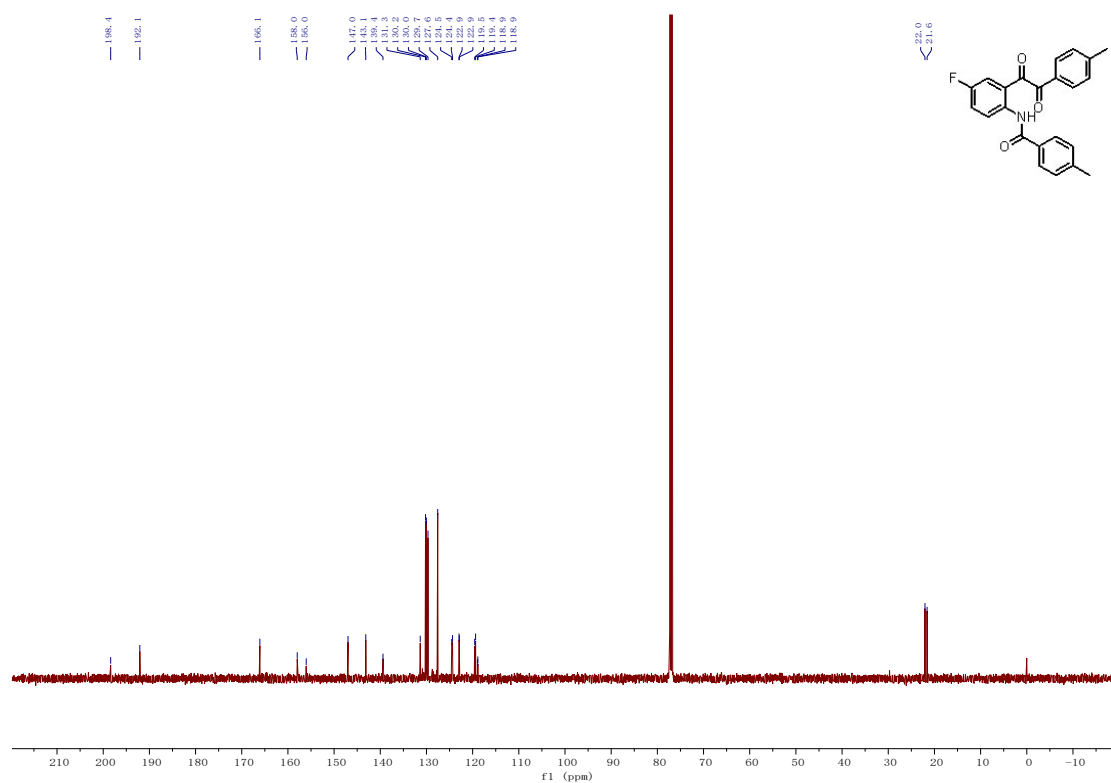

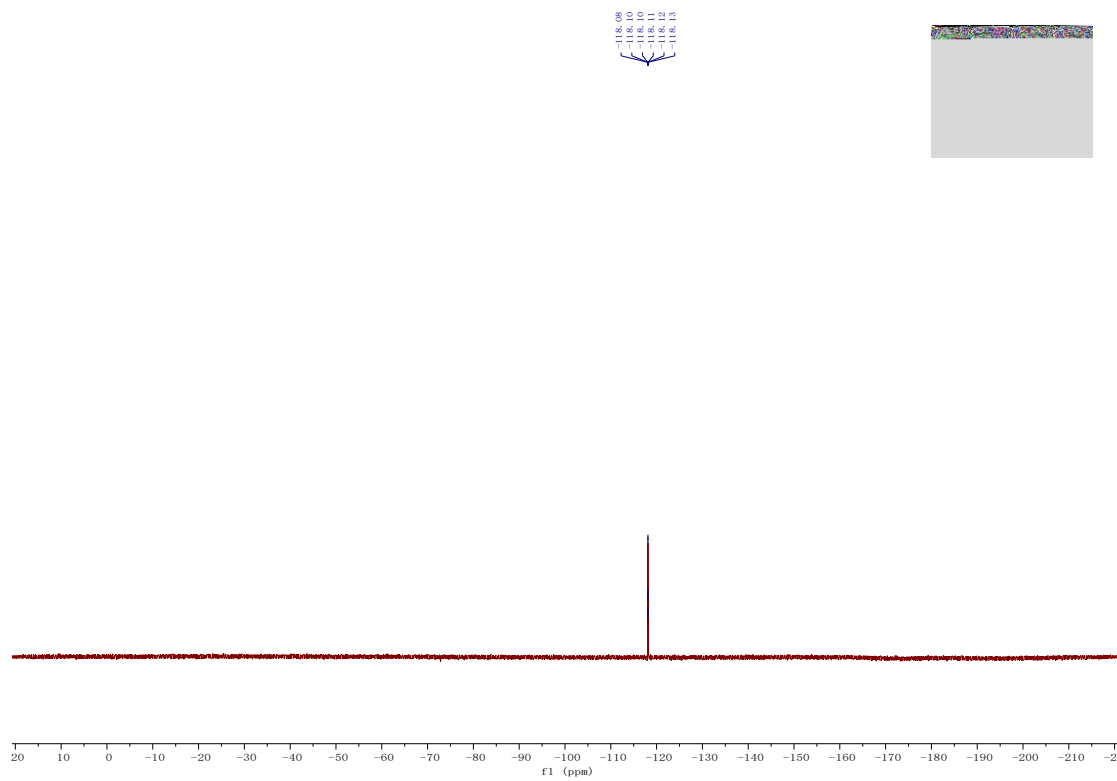

# N-(2-(2-(4-methoxyphenyl)-2-oxoacetyl)phenyl)pivalamide (3f)

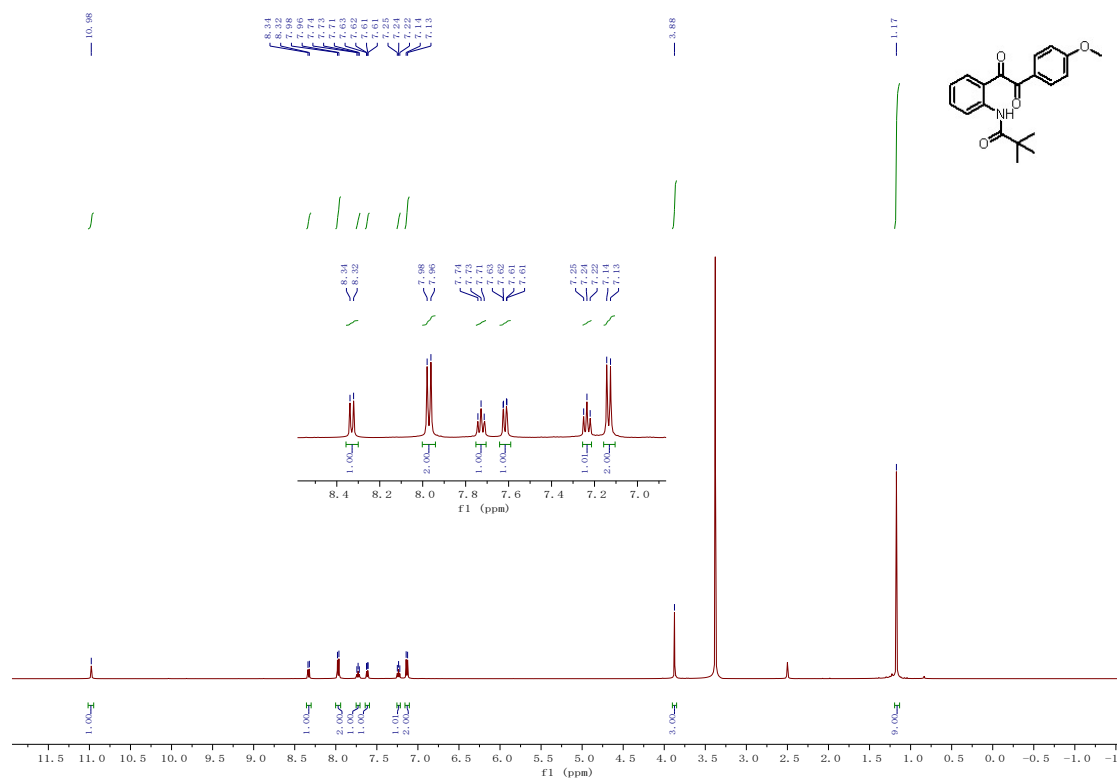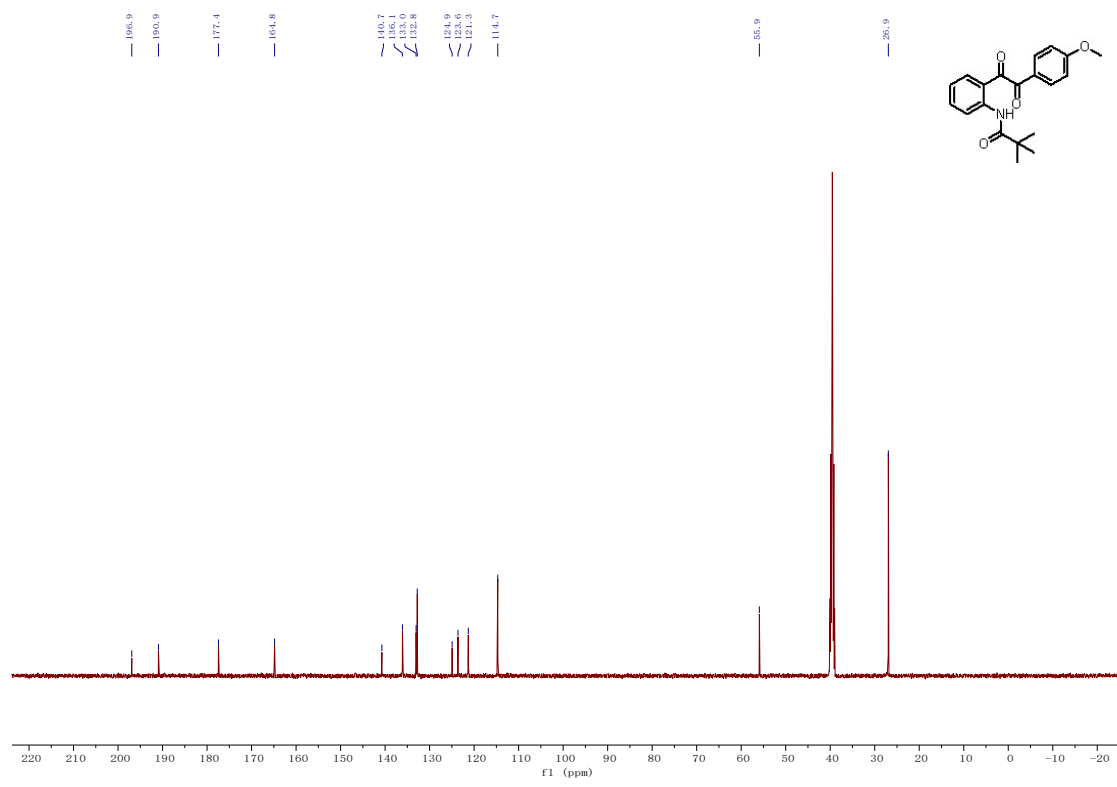



# N-(5-methyl-2-(2-oxo-2-(p-tolyl)acetyl)phenyl)pivalamide (3g)

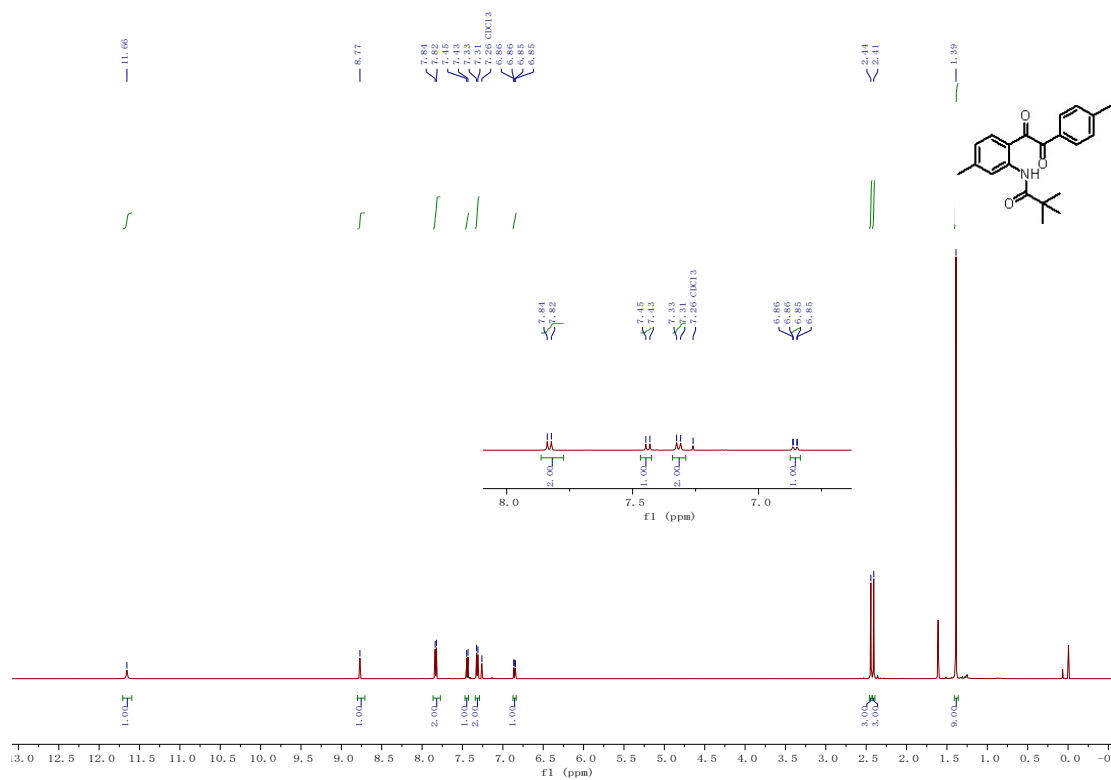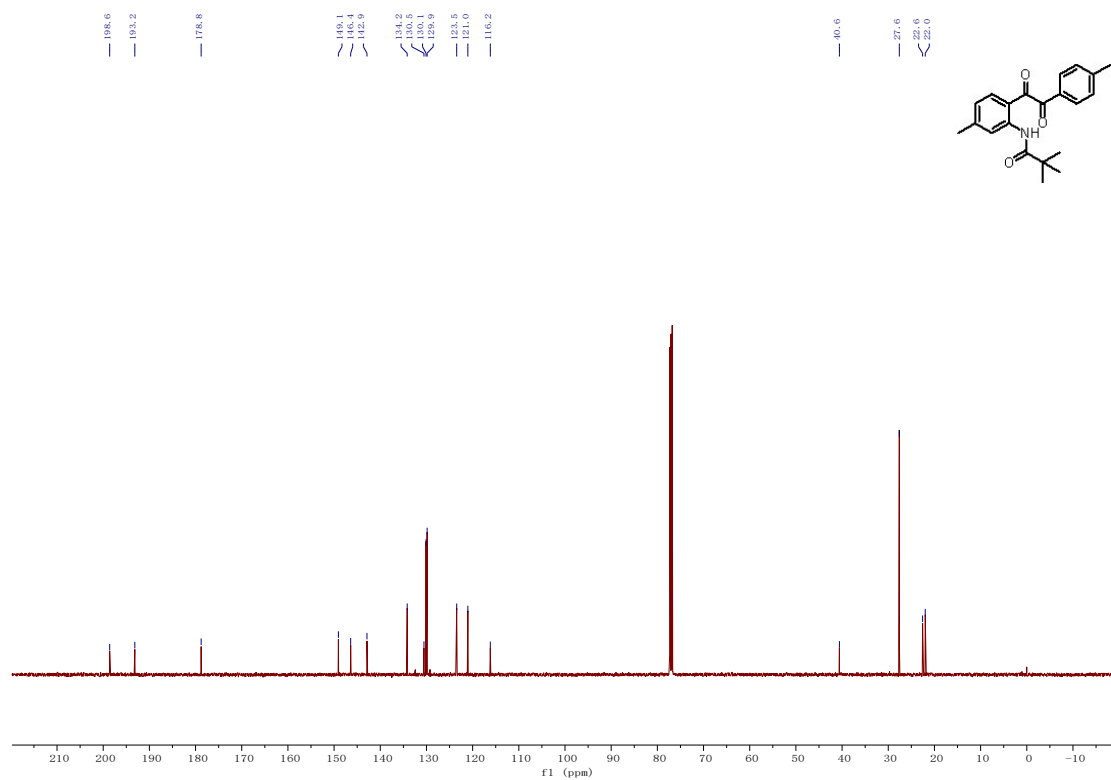

# N-(2-(2-oxo-2-(p-tolyl)acetyl)pyridine-3-yl)acetamide (3h)

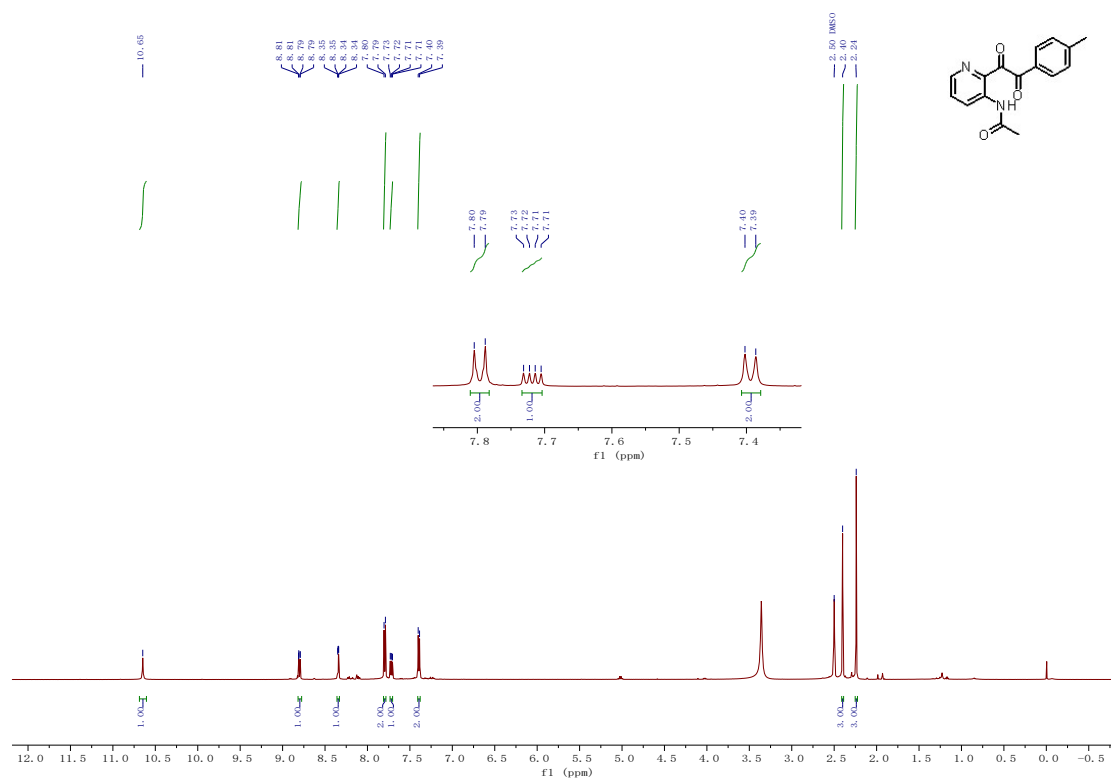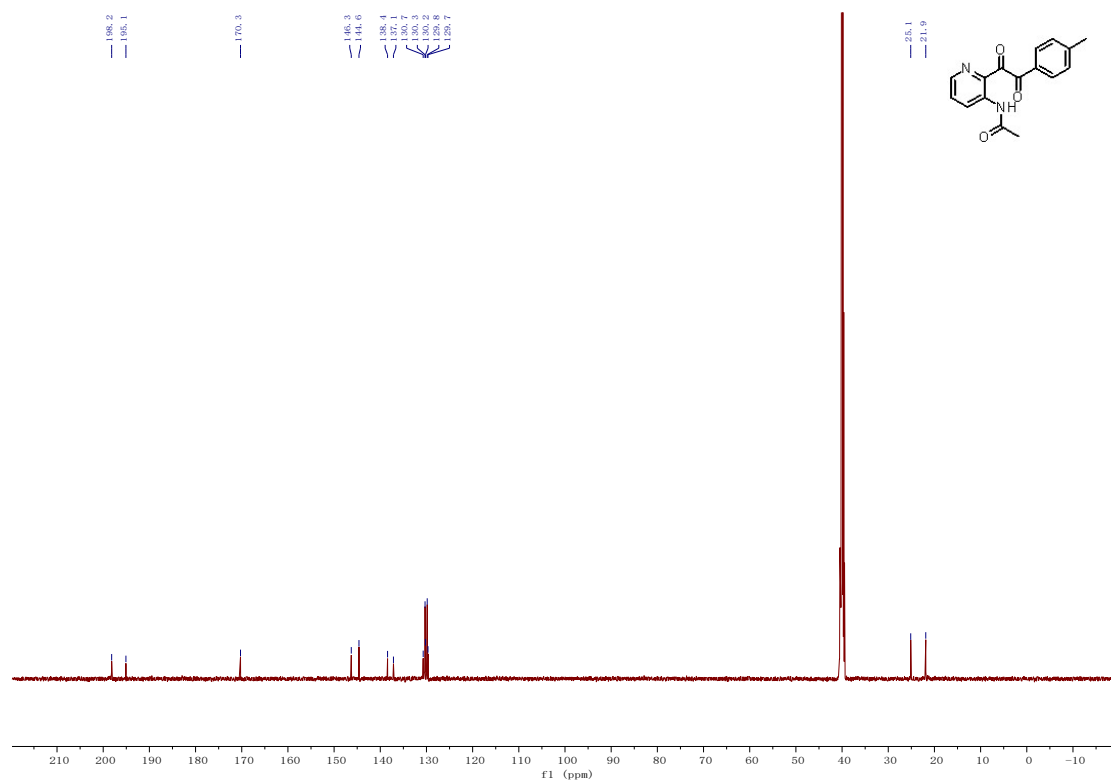

## 2-hydroxy-2-(p-tolyl)indolin-3-one (4a)

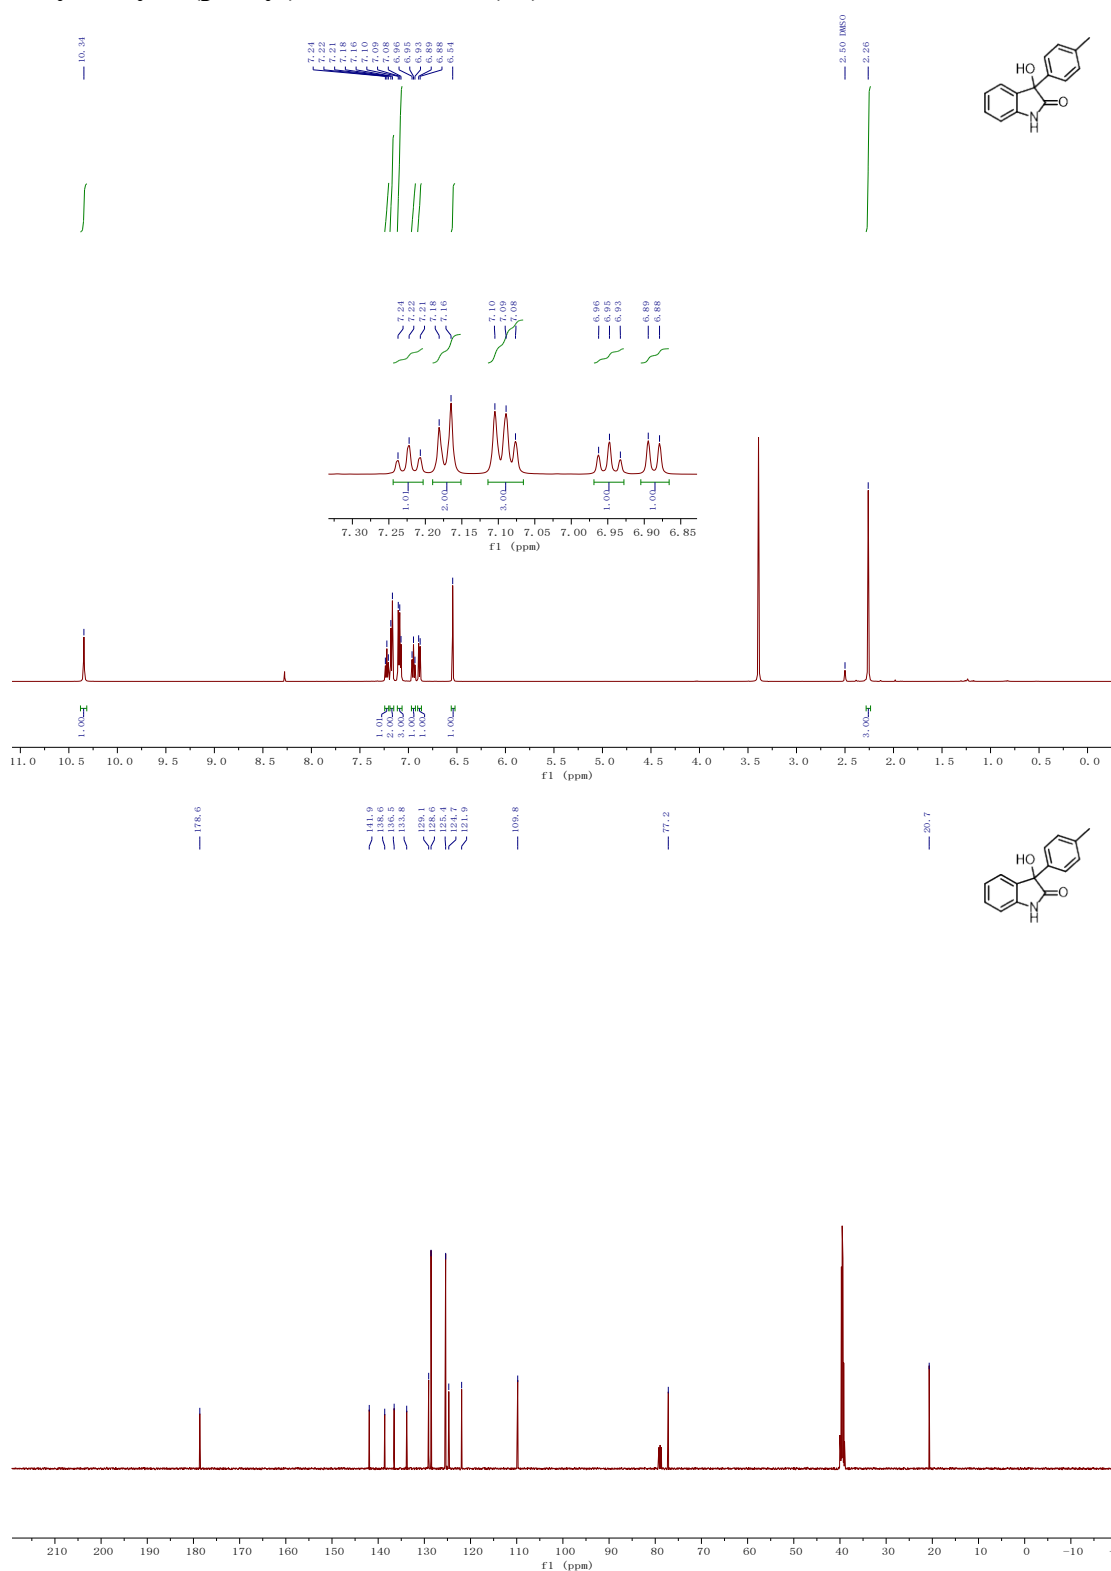

### 3-hydroxy-6-methyl-3-(p-tolyl)indolin-2-one (4b)

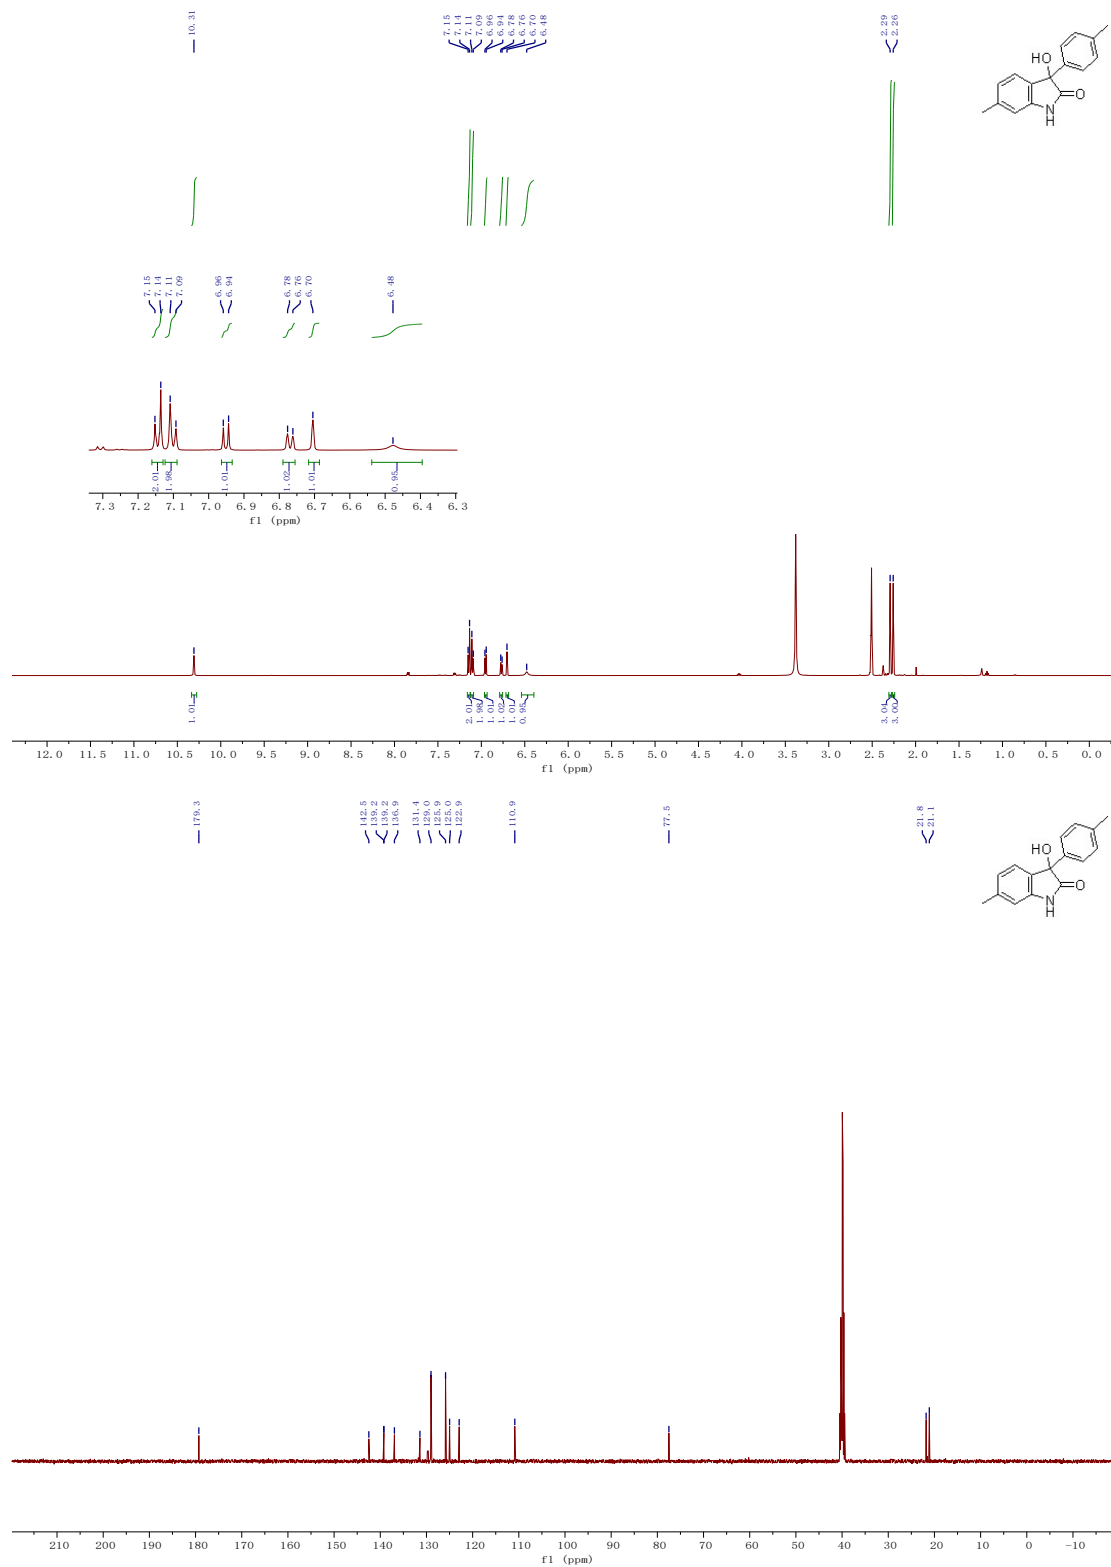

### 3-hydroxy-3-(m-tolyl)indolin-2-one (4c)

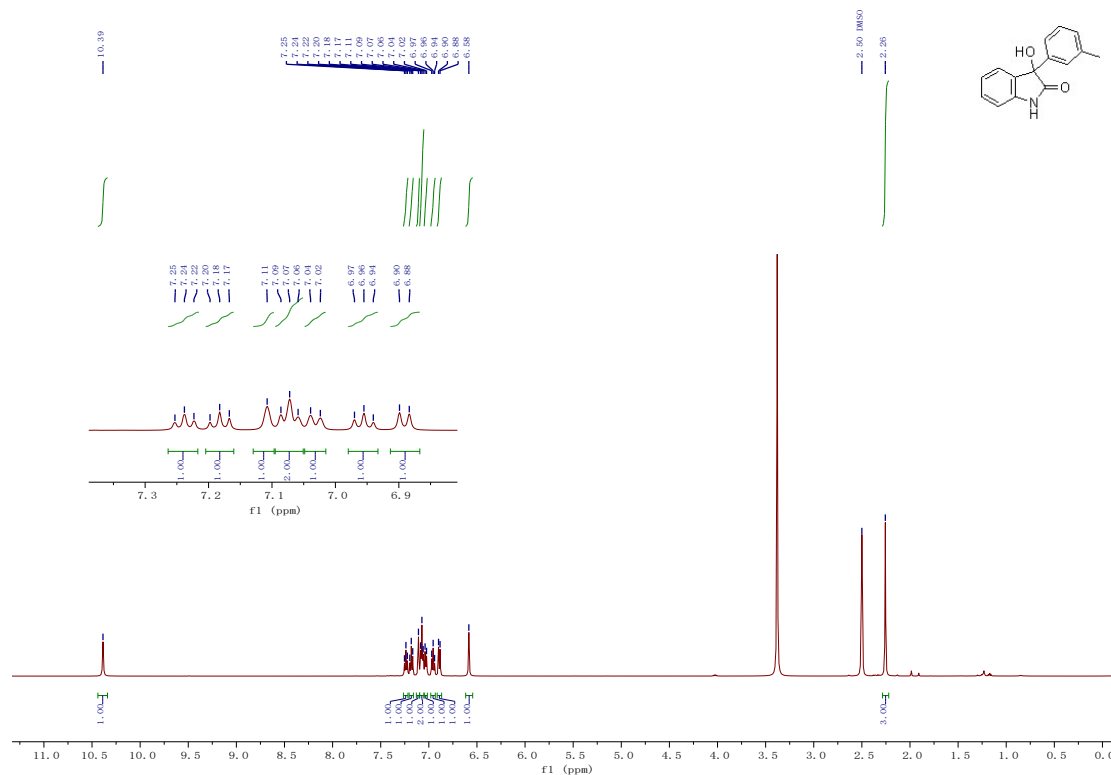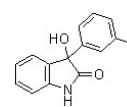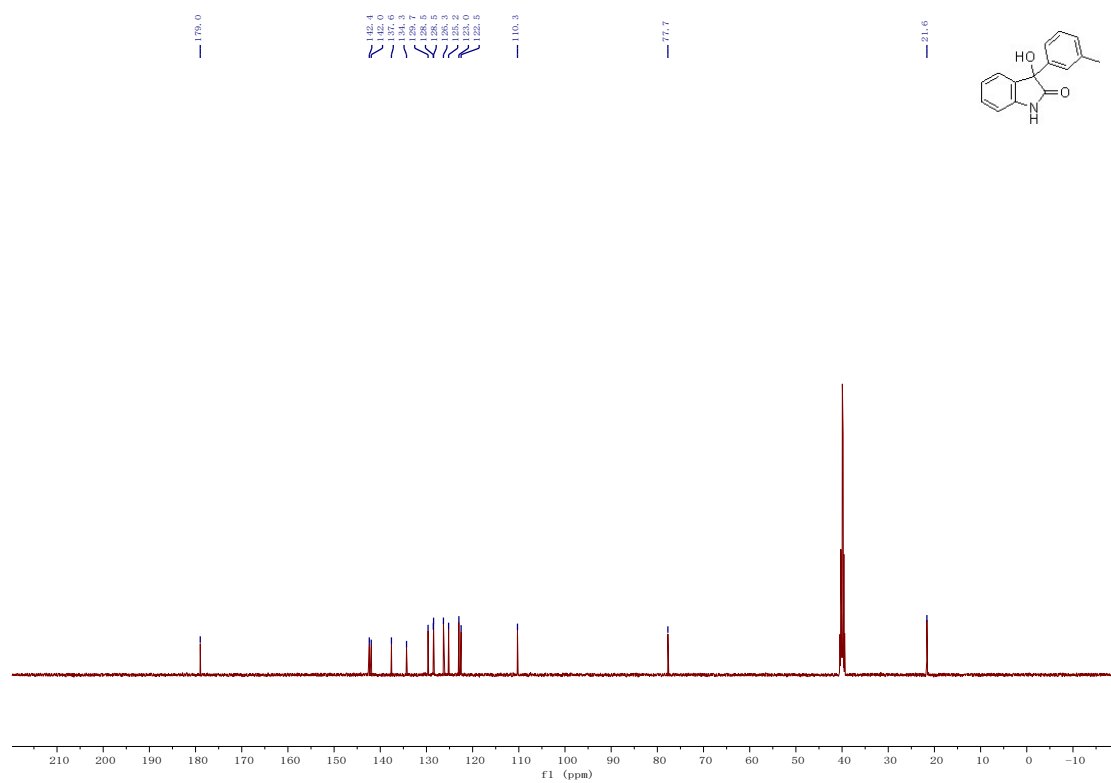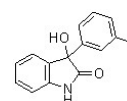

### 3-(3-chlorophenyl)-3-hydroxyindolin-2-one (4d)

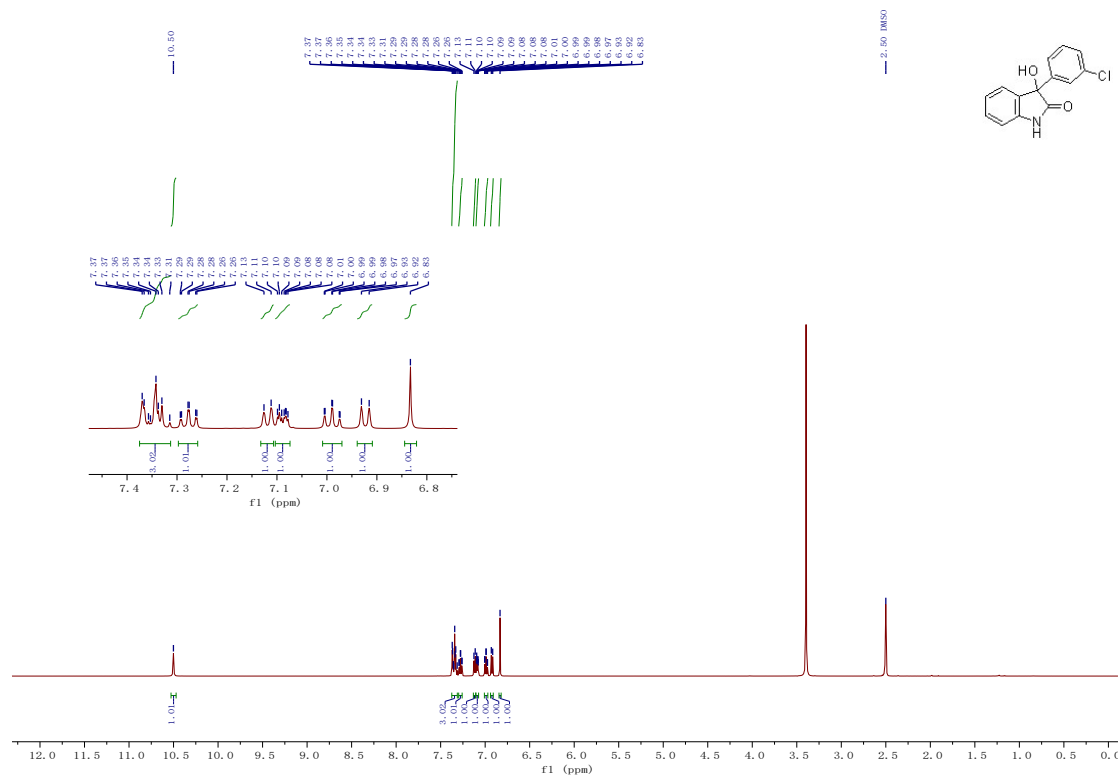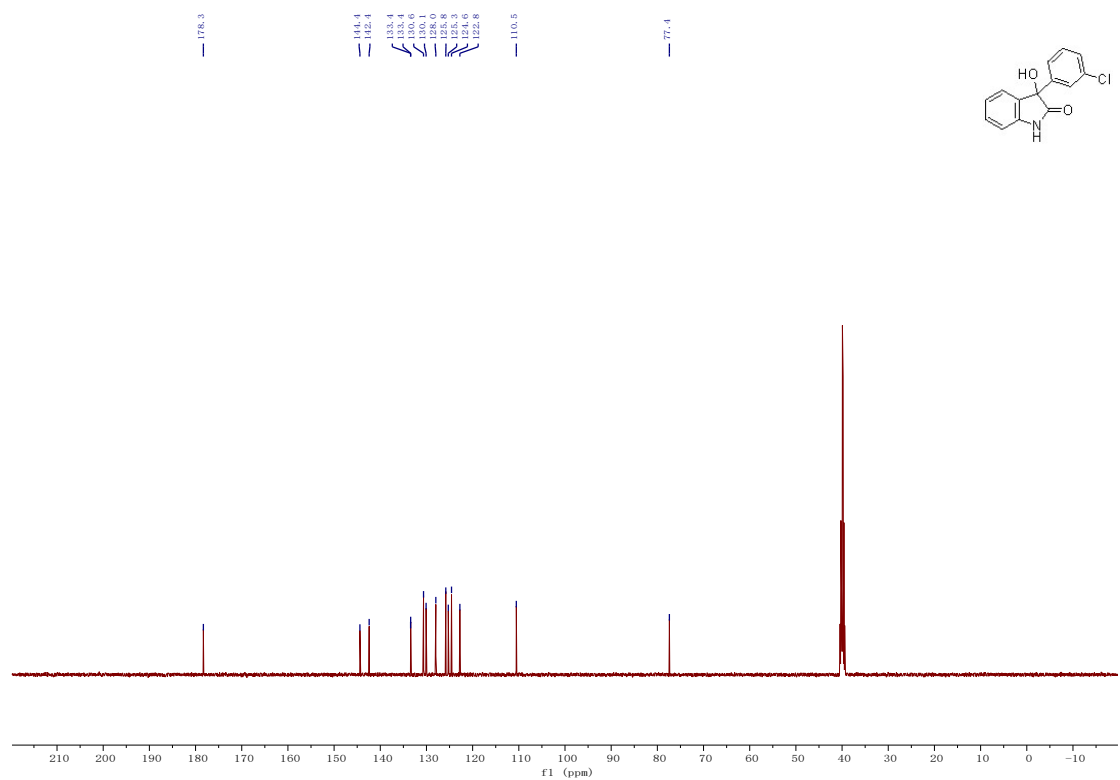



# 5-fluoro-3-hydroxy-3-(p-tolyl)indolin-2-one (4f)

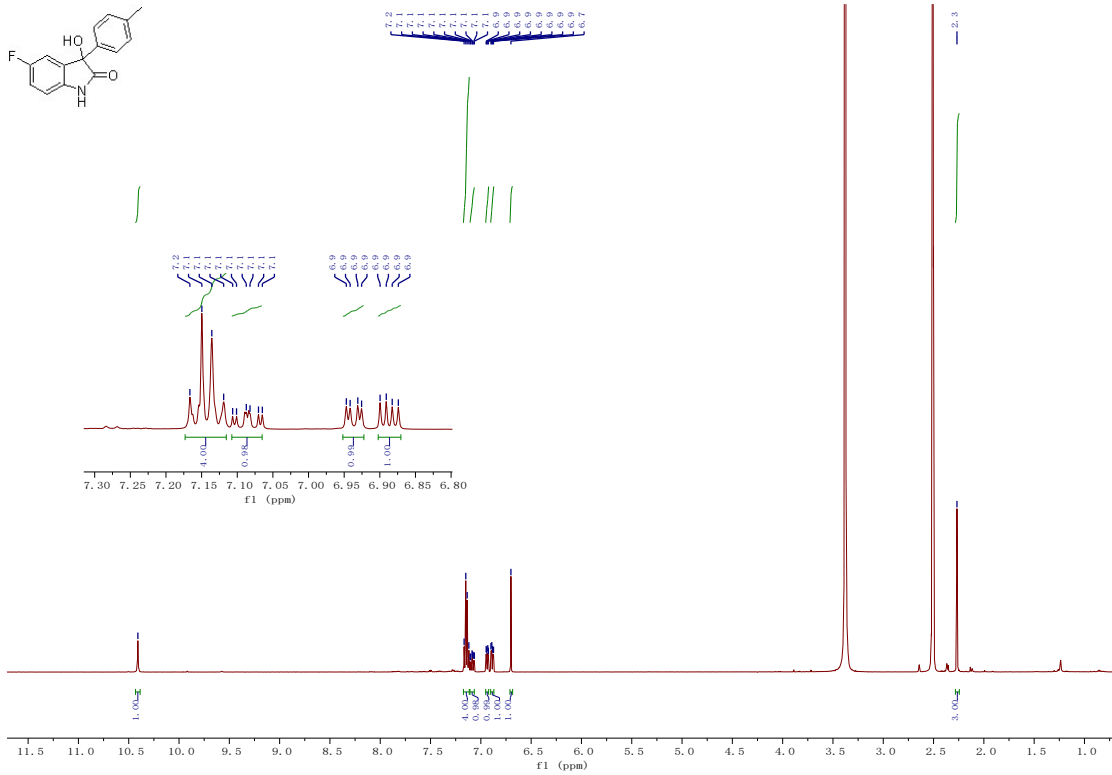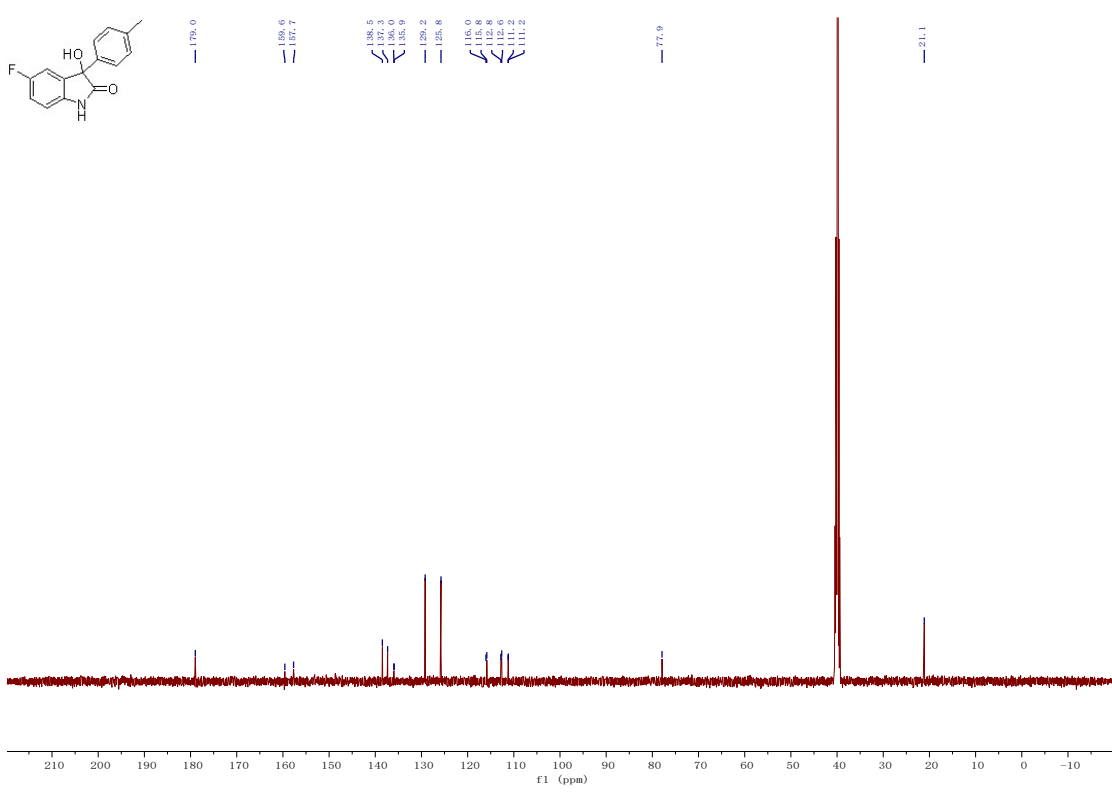



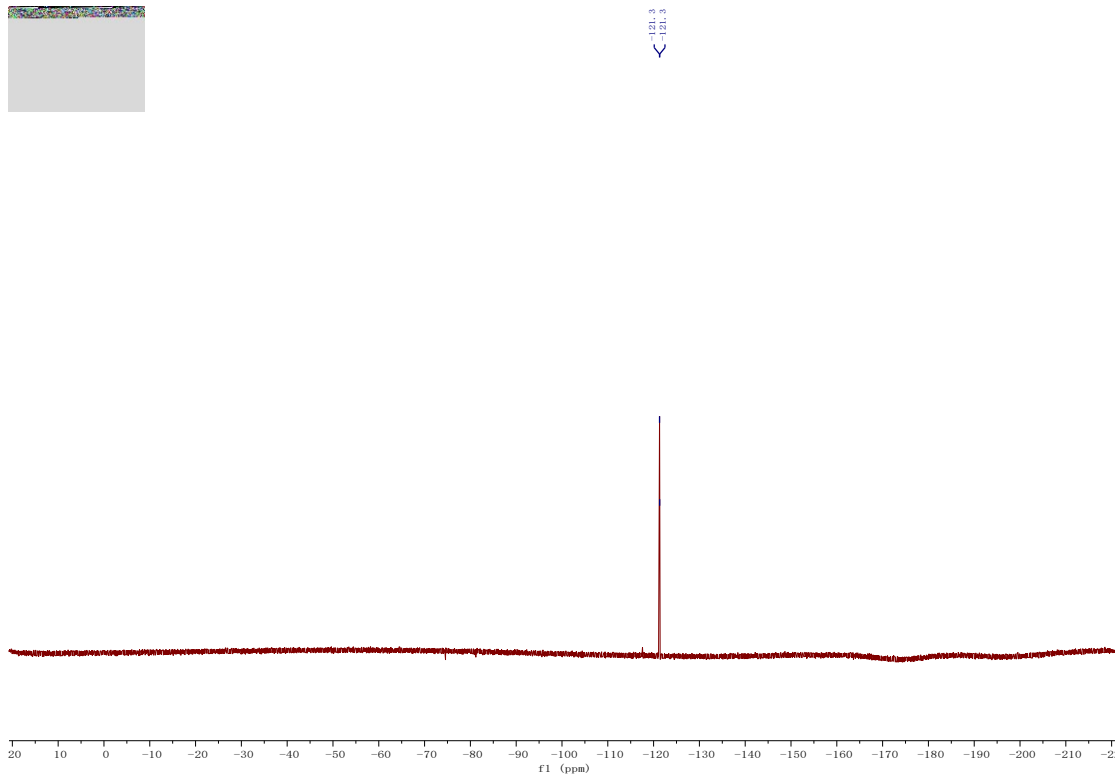

### 5-bromo-3-hydroxy-3-(p-tolyl)indolin-2-one (4g)

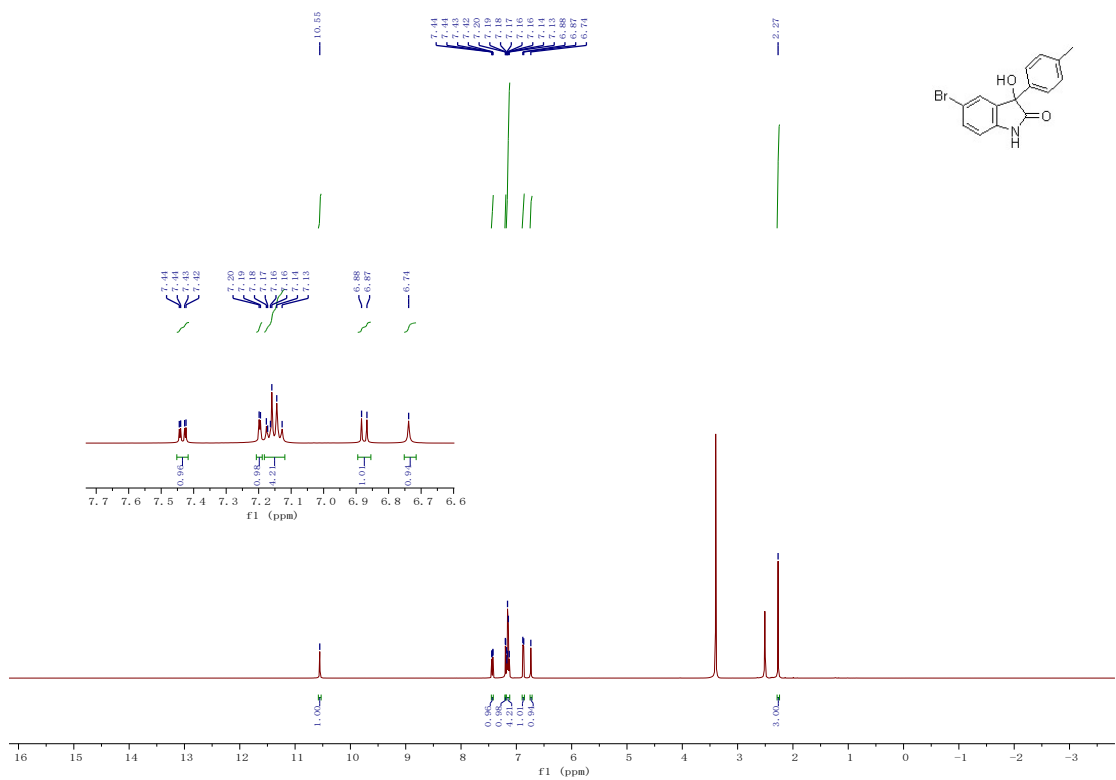



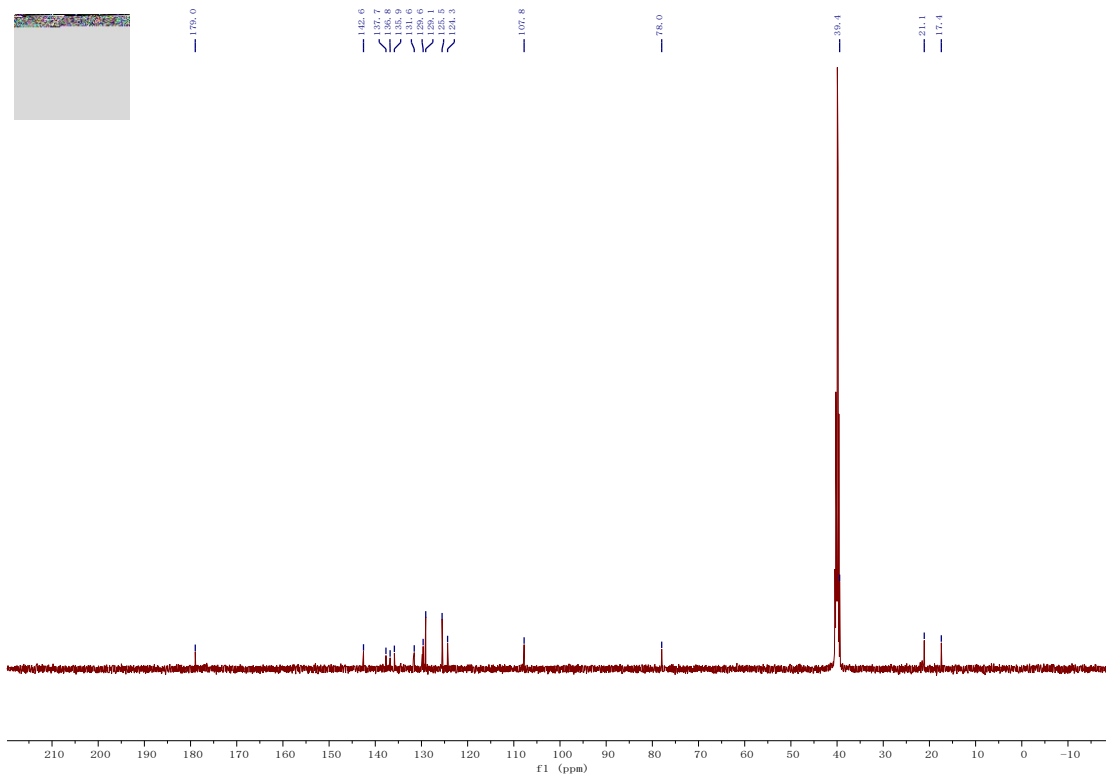

## NMR Spectra of 5

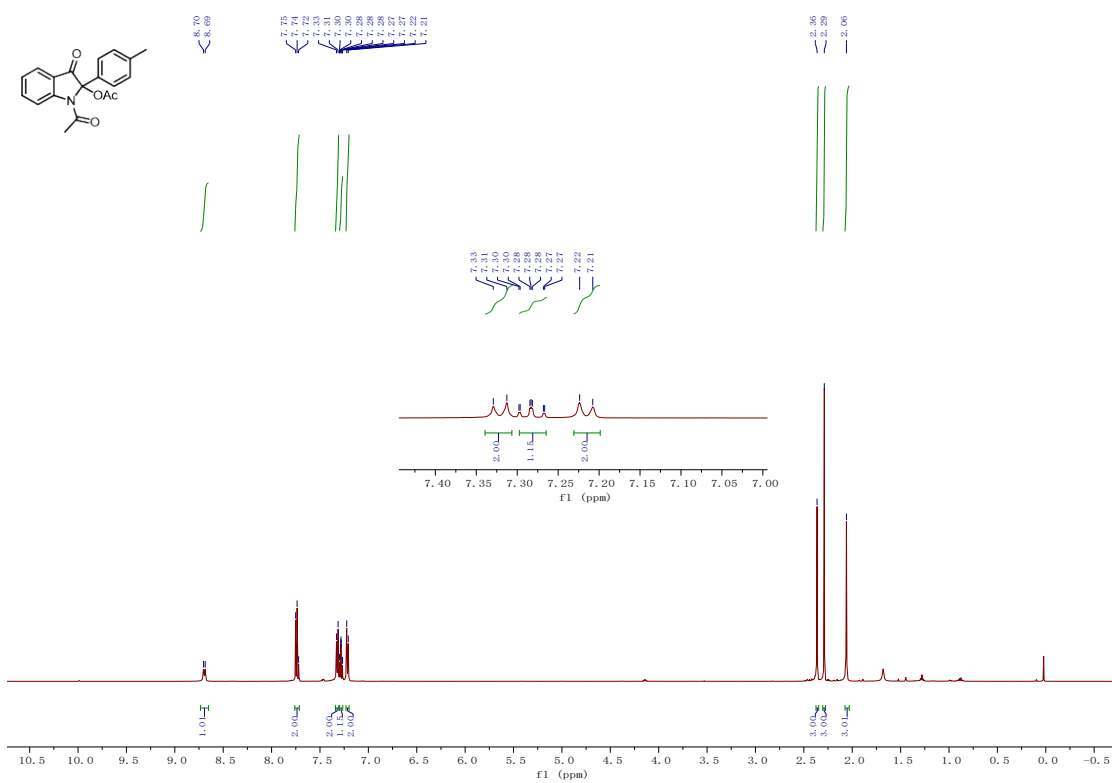

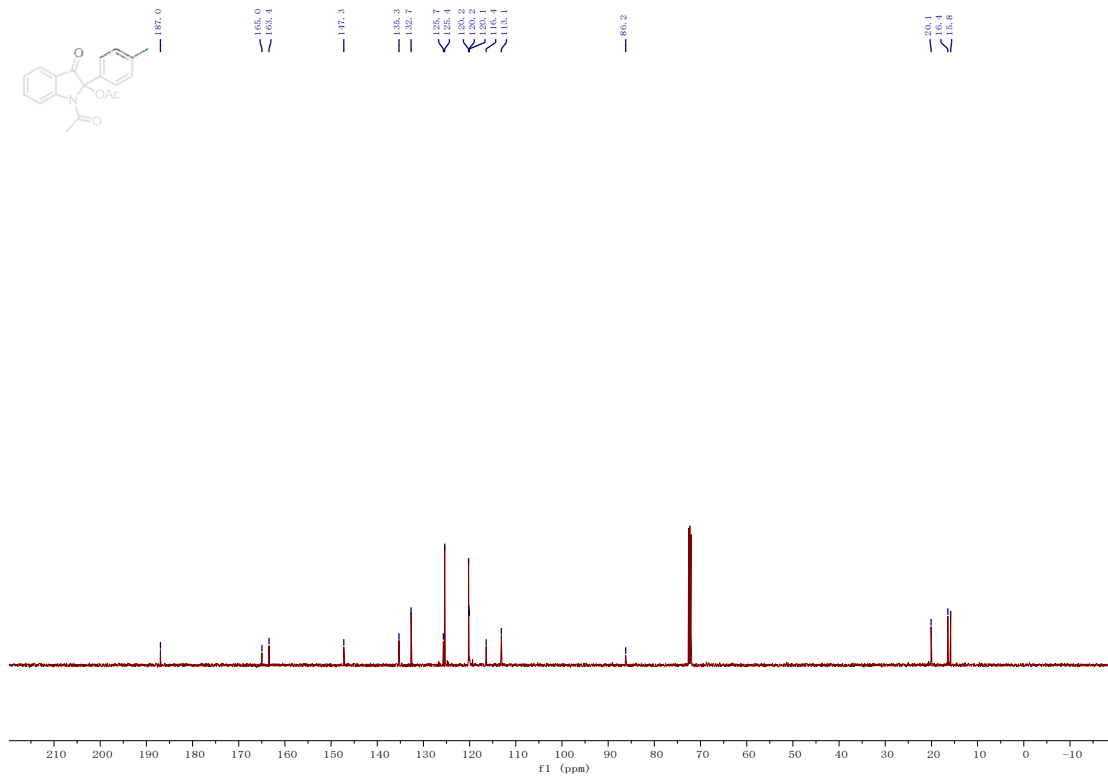

## NMR Spectra of 6

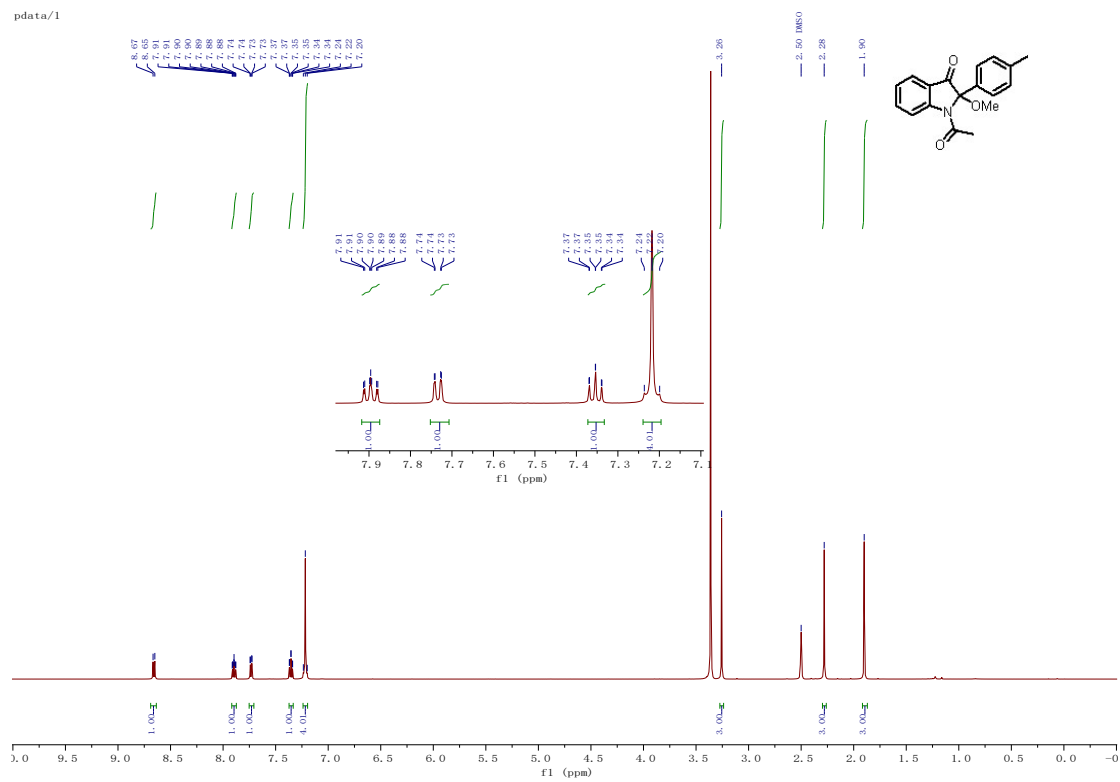

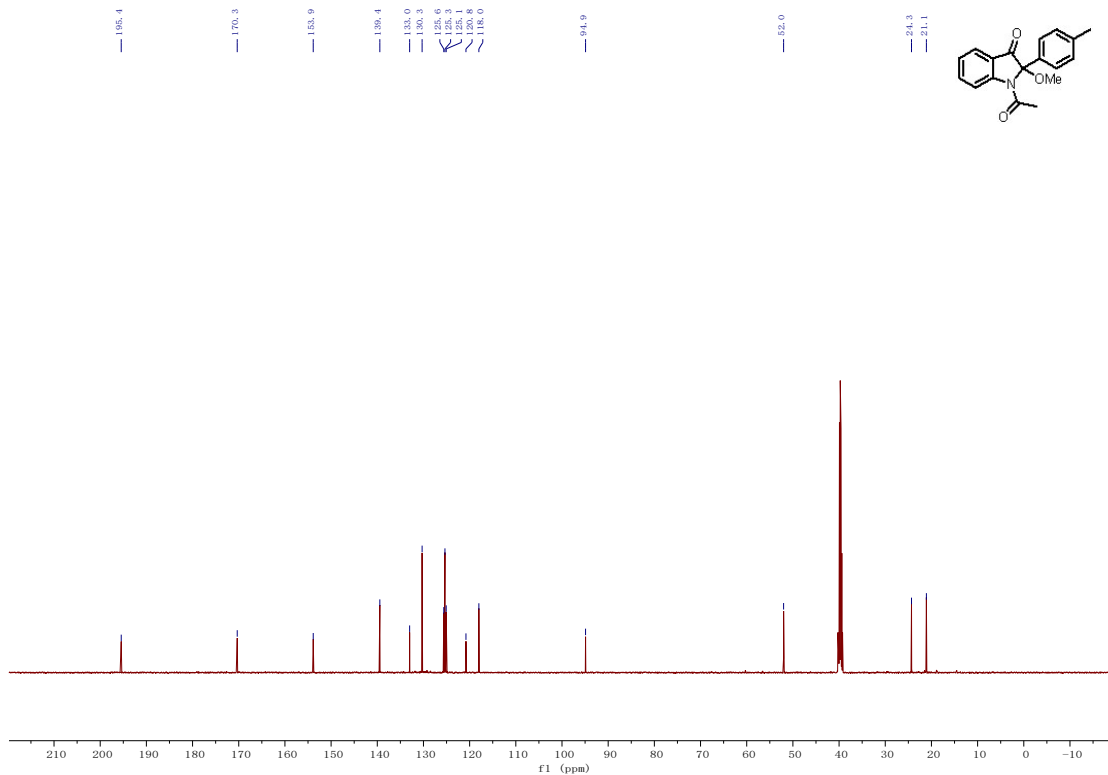

## NMR Spectra of 7

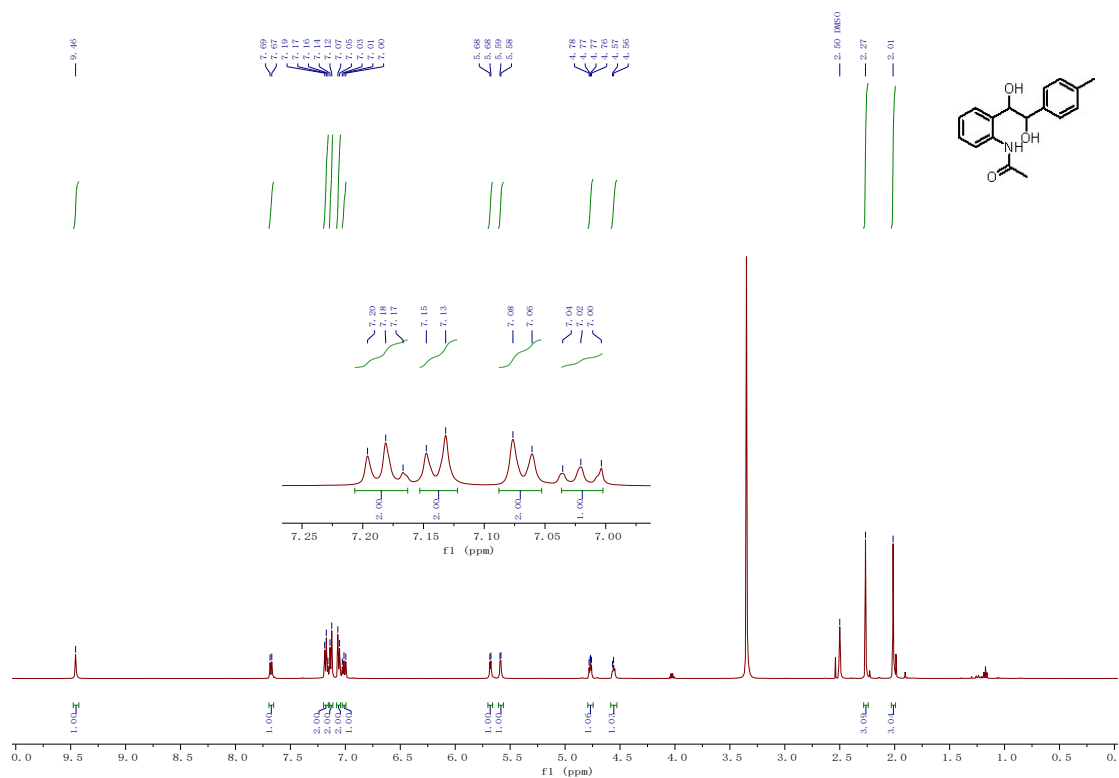



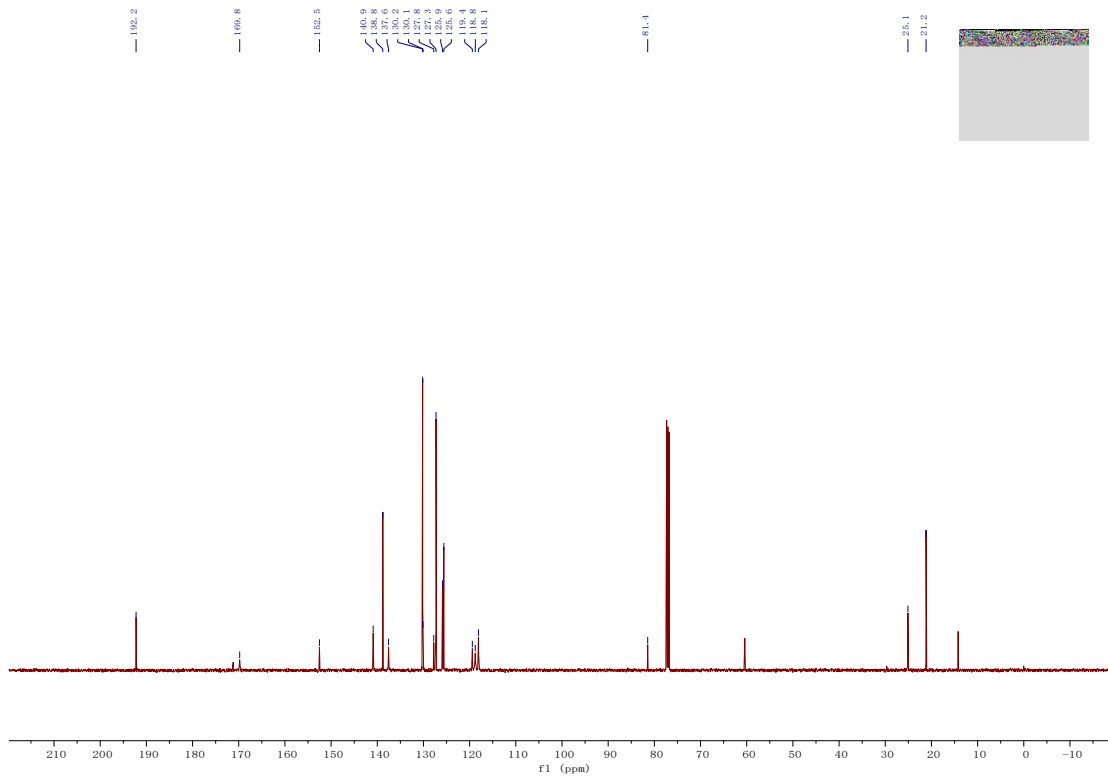

Supplement: d3cc01390a1.pdf [file d3cc01390a1.pdf]
